# Supplementary material for: Gut Microbiota and Related Metabolites Were Disturbed in Ulcerative Colitis and Partly Restored After Mesalamine Treatment
Source: Front Pharmacol. 2021 Jan 18;11:620724. doi: 10.3389/fphar.2020.620724 (PMC7898679; doi:10.3389/fphar.2020.620724)
Supplement: Supplementary file 1 [file table1.xlsx]

## Sheet: 两组差异检验统计表
Species name	NC-Mean(%)	NC-Sd(%)	UC-Mean(%)	UC-Sd(%)	Pvalue	Corrected pvalue	Lower ci	Upper ci	Effectsize
g__Streptococcus	1.266	1.67	11.24	10.63	0.0009386	0.01136	-16.5	-4.251	-9.972
g__Escherichia-Shigella	0.8265	1.746	8.721	11.32	0.01915	0.0729	-15.23	-1.813	-7.894
g__Faecalibacterium	8.045	8.771	1.489	3.094	0.0207	0.07765	1.843	11.8	6.557
g__Romboutsia	0.5279	0.8172	6.754	15.86	0.02418	0.08778	-16.75	-0.2794	-6.226
g__Agathobacter	3.195	3.312	1.478	2.312	0.03756	0.09491	-0.5871	3.981	1.718
g__Dorea	3.097	4.522	1.117	2.153	0.02073	0.07765	-0.456	4.861	1.98
g__[Ruminococcus]_torques_group	1.878	2.584	0.7793	2.397	0.004444	0.02689	-0.9607	2.884	1.099
g__Prevotella_9	2.401	7.009	0.1276	0.2446	0.01915	0.0729	-0.08655	6.378	2.273
g__Clostridium_sensu_stricto_1	0.1021	0.2611	2.413	5.124	0.002079	0.01794	-5.602	-0.08259	-2.311
g__Ruminococcus_2	2.465	3.376	0.05005	0.144	0.01437	0.06	0.9038	4.357	2.415
g__Alistipes	1.623	2.595	0.1547	0.2009	0.04328	0.1083	0.277	2.873	1.468
g__Enterococcus	0.1091	0.2848	1.602	3.562	0.0008415	0.01045	-4.001	-0.09229	-1.493
g__Parabacteroides	1.299	1.507	0.158	0.3107	0.0007583	0.009673	0.4249	1.92	1.141
g__Butyricicoccus	0.9311	0.7204	0.2472	0.723	0.004852	0.02899	0.05661	1.158	0.6839
g__Citrobacter	0.15	0.5418	0.963	2.503	0.0003054	0.005148	-2.549	0.2262	-0.8129
g__Lactobacillus	0.05591	0.1995	0.8305	0.8669	0.000132	0.002709	-1.319	-0.2276	-0.7747
g__Klebsiella	0.2277	0.5388	0.6476	1.051	0.01328	0.05698	-1.182	0.1614	-0.42
g__Ruminococcaceae_UCG-013	0.5618	0.5122	0.289	0.6164	0.03661	0.09435	-0.1997	0.6831	0.2727
g__Erysipelatoclostridium	0.03924	0.09583	0.8113	1.746	0.001431	0.01299	-1.913	-0.04235	-0.772
g__Roseburia	0.6693	0.5739	0.1712	0.3104	0.007046	0.04106	0.1643	0.8543	0.4981
g__Pseudomonas	0.6093	1.329	0.01242	0.02631	0.002242	0.0189	0.04994	1.393	0.597
g__[Clostridium]_innocuum_group	0.006989	0.01783	0.5329	0.7705	0.01915	0.0729	-1.013	-0.1054	-0.5258
g__Actinomyces	0.04784	0.06684	0.3349	0.6161	0.001542	0.01373	-0.686	-0.04726	-0.287
g__Granulicatella	0.01451	0.02218	0.3308	0.6201	0.0002653	0.004816	-0.7324	-0.06322	-0.3162
g__Ruminiclostridium_5	0.1623	0.1559	0.1806	0.4109	0.03752	0.09491	-0.3123	0.1905	-0.01826
g__Enterobacter	0.214	0.7791	0.1031	0.1687	0.002091	0.01794	-0.1937	0.5844	0.1109
g__Alloprevotella	0.2685	1.005	0.01091	0.0163	0.01454	0.0602	-0.01881	0.7999	0.2576
g__Intestinibacter	0.02849	0.03545	0.2322	0.3605	0.03425	0.09435	-0.4337	-0.01328	-0.2037
g__norank_f__Muribaculaceae	0.07956	0.2826	0.1757	0.3207	0.0002942	0.005144	-0.3785	0.1295	-0.09621
g__[Eubacterium]_ventriosum_group	0.2285	0.3676	0.00301	0.007051	0.002895	0.02397	0.06747	0.4424	0.2254
g__norank_f__Saccharimonadaceae	0.009139	0.01414	0.1795	0.1242	6.836e-05	0.002401	-0.2417	-0.09853	-0.1704
g__Bacillus	0.0002688	0.001006	0.1806	0.384	9.182e-06	0.0006191	-0.428	-0.04478	-0.1803
g__Pediococcus	0	0	0.1539	0.2708	5.464e-06	0.0005158	-0.3161	-0.02897	-0.1539
g__Gemella	0.003763	0.004895	0.1475	0.2746	0.0001125	0.002415	-0.3178	-0.02005	-0.1437
g__Staphylococcus	0.0008064	0.001602	0.149	0.3166	1.832e-05	0.001081	-0.3582	-0.03381	-0.1482
g__Lachnospiraceae_UCG-001	0.1438	0.2703	0.001505	0.003635	0.02531	0.09119	0.02564	0.2973	0.1423
g__Coprococcus_1	0.1086	0.1002	0.0286	0.06237	0.03588	0.09435	0.0172	0.1442	0.07999
g__Rothia	0.006451	0.01994	0.1306	0.2159	0.0001634	0.003085	-0.2617	-0.02467	-0.1241
g__Ruminococcaceae_UCG-004	0.09945	0.1146	0.02408	0.06834	0.01609	0.06436	0.004134	0.1453	0.07537
g__Slackia	0	0	0.1099	0.3281	0.03678	0.09435	-0.3186	0	-0.1098
g__Bilophila	0.09166	0.1261	0.005268	0.00714	0.02582	0.09231	0.02296	0.1544	0.08639
g__Prevotellaceae_NK3B31_group	0.08574	0.3208	0.008655	0.0196	0.01427	0.06	-0.01618	0.2538	0.07706
g__Prochlorococcus_MIT9313	0	0	0.09144	0.1934	5.464e-06	0.0005158	-0.2164	-0.02333	-0.09144
g__unclassified_f__Propionibacteriaceae	0	0	0.07225	0.1733	5.432e-06	0.0005158	-0.1829	-0.01204	-0.07225
g__Prevotella_7	0.01156	0.03052	0.05645	0.1276	0.02408	0.08778	-0.1337	0.009957	-0.04488
g__Oscillibacter	0.05322	0.08689	0.005645	0.008914	0.04662	0.1155	0.007525	0.09715	0.04758
g__unclassified_o__Lactobacillales	0	0	0.05456	0.09143	0.0003998	0.005391	-0.1163	-0.01167	-0.05457
g__CHKCI001	0	0	0.0508	0.1541	0.01311	0.05697	-0.1494	-0.0003763	-0.0508
g__Aeromonas	0.0002688	0.001006	0.04854	0.105	8.94e-06	0.0006191	-0.1151	-0.01113	-0.04827
g__norank_f__norank_o__SBR1031	0	0	0.04704	0.1016	5.432e-06	0.0005158	-0.1121	-0.01016	-0.04704
g__Family_XIII_AD3011_group	0.03817	0.04143	0.008279	0.02235	0.02875	0.09435	0.003763	0.05382	0.02989
g__Cetobacterium	0	0	0.0444	0.09572	2.541e-05	0.001199	-0.1061	-0.01091	-0.0444
g__norank_f__norank_o__Chloroplast	0.00215	0.003205	0.04215	0.07312	4.045e-05	0.001591	-0.08618	-0.01231	-0.04
g__unclassified_f__Burkholderiaceae	0.02849	0.1066	0.01129	0.02279	0.005189	0.03061	-0.02145	0.08209	0.0172
g__Solobacterium	0.001882	0.004109	0.03763	0.05997	0.000156	0.003068	-0.0774	-0.00973	-0.03575
g__unclassified_f__Brocadiaceae	0	0	0.03951	0.09225	0.0001068	0.002401	-0.0997	-0.006397	-0.03951
g__unclassified_o__Selenomonadales	0.03602	0.09236	0	0	0.04338	0.1083	0.003495	0.08817	0.03602
g__norank_f__Desulfovibrionaceae	0	0	0.03575	0.07916	0.0001068	0.002401	-0.08807	-0.006774	-0.03575
g__Prevotella_6	0.01693	0.06121	0.01806	0.04029	0.04672	0.1155	-0.03284	0.04359	-0.001131
g__Acinetobacter	0.0005376	0.001367	0.03312	0.06057	2.837e-05	0.001217	-0.07262	-0.009245	-0.03258
g__Prevotellaceae_UCG-001	0	0	0.03349	0.07176	5.4e-06	0.0005158	-0.07978	-0.008278	-0.03349
g__Family_XIII_UCG-001	0.03145	0.04738	0.0003763	0.00119	0.01398	0.05943	0.009031	0.05785	0.03107
g__Weissella	0.001613	0.003205	0.0301	0.0543	0.03618	0.09435	-0.06456	-0.003602	-0.02849
g__Vibrio	0	0	0.02935	0.06803	0.0001063	0.002401	-0.07413	-0.004516	-0.02935
g__Lactococcus	0.004032	0.01509	0.02107	0.05093	0.001337	0.01292	-0.05269	0.006828	-0.01704
g__Oribacterium	0.001613	0.005052	0.02333	0.04363	0.01602	0.06436	-0.05177	-0.002311	-0.02172
g__Gordonibacter	0.02097	0.03938	0.003763	0.01064	0.02221	0.08254	0.0001072	0.04069	0.0172
g__Peptostreptococcus	0.002957	0.003359	0.02145	0.03967	0.0471	0.1158	-0.04607	-0.00258	-0.01849
g__Atopobium	0.003494	0.009952	0.0207	0.02633	0.01511	0.06158	-0.03435	-0.002151	-0.0172
g__norank_f__Barnesiellaceae	0	0	0.02408	0.03875	0.0001068	0.002401	-0.04778	-0.006774	-0.02408
g__Porphyromonas	0.002419	0.006015	0.02145	0.05205	0.008716	0.05017	-0.05342	-5.333e-05	-0.01903
g__Corynebacterium	0.001613	0.0041	0.02183	0.04601	0.03108	0.09435	-0.05026	-0.001344	-0.02021
g__Megasphaera	0.01236	0.04519	0.01091	0.01715	0.01246	0.05697	-0.0193	0.03154	0.001448
g__norank_f__norank_o__Saccharimonadales	0.001613	0.002845	0.01994	0.03955	0.02688	0.09435	-0.04434	-0.00129	-0.01833
g__unclassified_f__Barnesiellaceae	0	0	0.0207	0.03504	0.00139	0.01292	-0.04515	-0.00301	-0.0207
g__Rikenellaceae_RC9_gut_group	0.0008064	0.003017	0.01806	0.03516	0.0007258	0.009516	-0.0413	-0.003602	-0.01726
g__Cloacibacterium	0	0	0.01882	0.04913	0.004414	0.02689	-0.05191	-0.001129	-0.01881
g__Corynebacterium_1	0.001344	0.004071	0.01731	0.04172	0.01109	0.05697	-0.04371	-0.0001616	-0.01597
g__Candidatus_Actinomarina	0	0	0.01806	0.03617	2.46e-05	0.001199	-0.04214	-0.004892	-0.01806
g__Faecalibaculum	0.0008064	0.002179	0.01618	0.02942	0.009758	0.05549	-0.03311	-0.001183	-0.01537
g__Flavobacterium	0	0	0.01693	0.03928	0.000398	0.005391	-0.04288	-0.002258	-0.01693
g__norank_f__norank_o__norank_c__WS6_Dojkabacteria	0	0	0.01656	0.03932	0.000398	0.005391	-0.04288	-0.002258	-0.01655
g__norank_f__Mitochondria	0	0	0.01618	0.03951	0.001373	0.01292	-0.04288	-0.001882	-0.01618
g__Shuttleworthia	0.008333	0.02119	0.006774	0.01046	0.03293	0.09435	-0.009408	0.01468	0.00156
g__norank_f__norank_o__JGI_0000069-P22	0	0	0.0143	0.03212	0.0001006	0.002401	-0.03538	-0.002634	-0.0143
g__Prevotella_1	0	0	0.0143	0.03087	0.0001022	0.002401	-0.03462	-0.00301	-0.0143
g__Helicobacter	0	0	0.01392	0.02601	0.0003715	0.005391	-0.02972	-0.001881	-0.01392
g__norank_f__JG30-KF-CM45	0	0	0.01392	0.02007	0.0001027	0.002401	-0.02747	-0.004892	-0.01392
g__Finegoldia	0.0005376	0.002011	0.01242	0.02515	0.02306	0.08505	-0.02822	-0.0004301	-0.01188
g__norank_f__norank_o__KF-JG30-C25	0	0	0.01242	0.0254	0.004431	0.02689	-0.02973	-0.001882	-0.01242
g__Candidatus_Kuenenia	0	0	0.01167	0.02169	0.001396	0.01292	-0.02596	-0.002634	-0.01167
g__Truepera	0	0	0.01167	0.02646	0.0003872	0.005391	-0.0286	-0.001882	-0.01167
g__Proteiniphilum	0	0	0.01091	0.02176	0.000389	0.005391	-0.02484	-0.001882	-0.01091
g__Morganella	0.0002688	0.001006	0.01054	0.01461	0.001153	0.01292	-0.0208	-0.003387	-0.01027
g__Lachnospiraceae_NC2004_group	0.01075	0.02071	0	0	0.01185	0.05697	0.002419	0.02285	0.01075
g__Dubosiella	0	0	0.01016	0.0234	0.01316	0.05697	-0.02521	-0.0007526	-0.01016
g__Rikenella	0	0	0.009784	0.0141	0.000389	0.005391	-0.01882	-0.002634	-0.009784
g__Leuconostoc	0.001882	0.004366	0.007902	0.01235	0.0376	0.09491	-0.01435	0.0002685	-0.006021
g__Clade_Ia	0	0	0.009408	0.01433	0.0001037	0.002401	-0.01919	-0.003387	-0.009407
g__norank_f__A4b	0	0	0.009408	0.01749	0.001378	0.01292	-0.02145	-0.001505	-0.009408
g__OLB13	0	0	0.009031	0.01961	0.00438	0.02689	-0.02182	-0.001129	-0.009031
g__Novosphingobium	0	0	0.008655	0.02092	0.00438	0.02689	-0.02258	-0.0007526	-0.008655
g__W5053	0	0	0.008655	0.0172	0.004278	0.02689	-0.0207	-0.001505	-0.008655
g__Mogibacterium	0.0002688	0.001006	0.008279	0.01974	0.01845	0.07196	-0.02043	-0.0005913	-0.008009
g__Mycobacterium	0	0	0.008279	0.01736	0.004431	0.02689	-0.02032	-0.001129	-0.008279
g__Candidatus_Saccharimonas	0	0	0.00715	0.0164	0.01311	0.05697	-0.01844	-0.0003763	-0.007149
g__norank_f__Rikenellaceae	0	0	0.00715	0.01621	0.00438	0.02689	-0.01769	-0.0007526	-0.007149
g__Sphingomonas	0	0	0.006774	0.01493	0.001288	0.01292	-0.01618	-0.001129	-0.006773
g__norank_f__Bacteroidetes_vadinHA17	0	0	0.006774	0.01493	0.001288	0.01292	-0.01656	-0.001129	-0.006773
g__Synergistes	0	0	0.006774	0.01239	0.01316	0.05697	-0.01543	-0.0007526	-0.006774
g__norank_f__Erysipelotrichaceae	0	0	0.006397	0.01164	0.01311	0.05697	-0.01467	-0.0003763	-0.006396
g__Acetobacter	0	0	0.006397	0.01765	0.03666	0.09435	-0.01769	0	-0.006397
g__norank_f__AEGEAN-169_marine_group	0	0	0.006021	0.01388	0.004278	0.02689	-0.01505	-0.0007526	-0.006021
g__Bryobacter	0	0	0.006021	0.01257	0.001288	0.01292	-0.0143	-0.001129	-0.00602
g__norank_f__norank_o__norank_c__Anaerolineae	0	0	0.006021	0.01269	0.00438	0.02689	-0.0143	-0.0007526	-0.00602
g__Trichococcus	0	0	0.006021	0.01528	0.03678	0.09435	-0.01618	0	-0.006021
g__Sedimentibacter	0	0	0.005645	0.01307	0.03678	0.09435	-0.01467	0	-0.005644
g__Chryseobacterium	0	0	0.005645	0.0127	0.004278	0.02689	-0.01392	-0.0007526	-0.005644
g__Alteromonas	0	0	0.005645	0.007983	0.001373	0.01292	-0.01091	-0.001505	-0.005644
g__norank_f__JG30-KF-AS9	0	0	0.005645	0.01139	0.001288	0.01292	-0.01317	-0.001129	-0.005644
g__norank_f__norank_o__Gastranaerophilales	0	0	0.005268	0.01294	0.03678	0.09435	-0.01392	-0.0003763	-0.005268
g__Limnohabitans	0	0	0.005268	0.00942	0.00438	0.02689	-0.01129	-0.001129	-0.005268
g__Allobaculum	0	0	0.005268	0.01037	0.00438	0.02689	-0.01242	-0.001129	-0.005268
g__Comamonas	0	0	0.005268	0.01282	0.01297	0.05697	-0.01355	-0.0003763	-0.005268
g__Muribaculum	0	0	0.004892	0.01177	0.03678	0.09435	-0.01279	0	-0.004892
g__Wolbachia	0	0	0.004892	0.01035	0.004278	0.02689	-0.01167	-0.0007526	-0.004892
g__Bradyrhizobium	0	0	0.004892	0.01292	0.03666	0.09435	-0.01317	0	-0.004891
g__Pseudopropionibacterium	0	0	0.004892	0.01164	0.01297	0.05697	-0.01242	-0.0003763	-0.004892
g__Arthrobacter	0	0	0.004892	0.01035	0.004278	0.02689	-0.01129	-0.0007526	-0.004892
g__Synechococcus_CC9902	0	0	0.004516	0.008283	0.01311	0.05697	-0.009783	-0.0007526	-0.004515
g__Chlamydia	0	0	0.004516	0.009183	0.004278	0.02689	-0.01053	-0.0007526	-0.004515
g__Propioniciclava	0	0	0.004516	0.009353	0.01311	0.05697	-0.01053	-0.0003763	-0.004515
g__Scardovia	0	0	0.004516	0.009183	0.004278	0.02689	-0.01053	-0.0007526	-0.004515
g__norank_f__norank_o__Acidobacteriales	0	0	0.004139	0.008022	0.004278	0.02689	-0.009407	-0.0007526	-0.004139
g__Fastidiosipila	0	0	0.004139	0.008216	0.01311	0.05697	-0.009407	-0.0007526	-0.004139
g__Aurantimicrobium	0	0	0.004139	0.008022	0.004278	0.02689	-0.009783	-0.0007526	-0.004139
g__Arcobacter	0	0	0.004139	0.009462	0.03678	0.09435	-0.01053	0	-0.004139
g__norank_f__norank_o__SAR86_clade	0	0	0.004139	0.008405	0.03666	0.09435	-0.009407	0	-0.004139
g__unclassified_f__Caulobacteraceae	0	0	0.004139	0.008022	0.004278	0.02689	-0.009407	-0.0007526	-0.004139
g__Ruminiclostridium	0.0002688	0.001006	0.003763	0.004345	0.01513	0.06158	-0.006236	-0.0009676	-0.003494
g__Thermomonas	0.0002688	0.001006	0.003763	0.005322	0.01845	0.07196	-0.006774	-0.000699	-0.003494
g__norank_f__PHOS-HE36	0	0	0.003763	0.008129	0.01297	0.05697	-0.009031	-0.0003763	-0.003763
g__Aquabacterium	0	0	0.003763	0.009387	0.03666	0.09435	-0.009782	0	-0.003763
g__Arenimonas	0	0	0.003763	0.00687	0.004278	0.02689	-0.008279	-0.0007526	-0.003763
g__norank_f__F082	0	0	0.003763	0.006396	0.01311	0.05697	-0.007903	-0.0003763	-0.003764
g__Nitrolancea	0	0	0.003763	0.008129	0.01297	0.05697	-0.009031	-0.0003763	-0.003763
g__Eikenella	0	0	0.003763	0.006396	0.01311	0.05697	-0.007903	-0.0003763	-0.003763
g__Fermentimonas	0	0	0.003763	0.007096	0.01311	0.05697	-0.008655	-0.0003763	-0.003763
g__Chujaibacter	0	0	0.003387	0.008216	0.03666	0.09435	-0.008654	0	-0.003387
g__norank_f__norank_o__Subgroup_2	0	0	0.003387	0.006973	0.01297	0.05697	-0.008279	-0.0003763	-0.003387
g__Limnobacter	0	0	0.003387	0.006003	0.01311	0.05697	-0.007527	-0.0003763	-0.003387
g__norank_f__norank_o__norank_c__KD4-96	0	0	0.003387	0.008216	0.03666	0.09435	-0.008654	0	-0.003387
g__norank_f__Bacteroidales_UCG-001	0	0	0.003387	0.006973	0.01297	0.05697	-0.007903	-0.0003763	-0.003387
g__Streptomyces	0	0	0.003387	0.008216	0.03666	0.09435	-0.009031	0	-0.003387
g__Sediminibacterium	0	0	0.003387	0.008216	0.03666	0.09435	-0.009031	0	-0.003387
g__Campylobacter	0	0	0.003387	0.006973	0.01297	0.05697	-0.008279	-0.0003763	-0.003387
g__Mesotoga	0	0	0.003387	0.008216	0.03666	0.09435	-0.008654	0	-0.003387
g__Ellin6067	0	0	0.003387	0.004505	0.001288	0.01292	-0.006396	-0.001129	-0.003386
g__Burkholderia-Caballeronia-Paraburkholderia	0.0002688	0.001006	0.00301	0.003886	0.01845	0.07196	-0.005268	-0.0004838	-0.002742
g__Treponema_2	0	0	0.00301	0.007051	0.03666	0.09435	-0.007903	0	-0.003011
g__Extensimonas	0	0	0.00301	0.004954	0.01311	0.05697	-0.00602	-0.0003763	-0.00301
g__norank_f__ST-12K33	0	0	0.00301	0.007051	0.03666	0.09435	-0.007526	-0.0003763	-0.003011
g__dgA-11_gut_group	0	0	0.00301	0.00583	0.01297	0.05697	-0.006775	-0.0003763	-0.003011
g__norank_f__norank_o__norank_c__Latescibacteria	0	0	0.002634	0.00471	0.01297	0.05697	-0.005644	-0.0003763	-0.002634
g__Proteus	0	0	0.002634	0.005897	0.03666	0.09435	-0.006398	0	-0.002635
g__Clostridium_sensu_stricto_3	0	0	0.002634	0.005897	0.03666	0.09435	-0.006775	0	-0.002635
g__Halomonas	0	0	0.002634	0.005897	0.03666	0.09435	-0.006775	0	-0.002635
g__norank_f__norank_o__SJA-15	0	0	0.002634	0.005897	0.03666	0.09435	-0.006398	0	-0.002635
g__norank_f__norank_o__norank_c__c5LKS83	0	0	0.002634	0.005033	0.03678	0.09435	-0.00602	0	-0.002634
g__Sva0996_marine_group	0	0	0.002634	0.005897	0.03666	0.09435	-0.006398	0	-0.002635
g__Macellibacteroides	0	0	0.002258	0.004045	0.03678	0.09435	-0.004892	0	-0.002258
g__norank_f__norank_o__NB1-j	0	0	0.002258	0.00476	0.03666	0.09435	-0.005267	0	-0.002258
g__norank_f__Prolixibacteraceae	0	0	0.001882	0.003657	0.03666	0.09435	-0.004516	0	-0.001882
g__norank_f__Anaerolineaceae	0	0	0.001882	0.003657	0.03666	0.09435	-0.004516	0	-0.001882
g__norank_f__Rhodothermaceae	0	0	0.001882	0.003198	0.03666	0.09435	-0.003763	0	-0.001882
g__Stenotrophobacter	0	0	0.001882	0.003657	0.03666	0.09435	-0.00414	0	-0.001882
g__norank_f__DEV007	0	0	0.001882	0.003657	0.03666	0.09435	-0.004139	0	-0.001882
g__Blvii28_wastewater-sludge_group	0	0	0.001882	0.003657	0.03666	0.09435	-0.00414	0	-0.001882
g__Aerococcus	0	0	0.001882	0.003657	0.03666	0.09435	-0.004139	0	-0.001882
g__Brevundimonas	0	0	0.001882	0.003198	0.03666	0.09435	-0.004139	0	-0.001882
g__unclassified_o__Saccharimonadales	0	0	0.001882	0.003657	0.03666	0.09435	-0.004516	0	-0.001882
g__unclassified_f__Sphingomonadaceae	0	0	0.001882	0.003657	0.03666	0.09435	-0.00414	0	-0.001882
g__[Eubacterium]_xylanophilum_group	0	0	0.001882	0.003657	0.03666	0.09435	-0.004516	0	-0.001882
g__norank_f__Saprospiraceae	0	0	0.001505	0.002631	0.03666	0.09435	-0.003387	0	-0.001505
g__Polynucleobacter	0	0	0.001505	0.001943	0.01269	0.05697	-0.002634	-0.0003763	-0.001505
g__norank_f__NS9_marine_group	0	0	0.001505	0.002631	0.03666	0.09435	-0.003387	0	-0.001505
g__Denitratisoma	0	0	0.001505	0.002631	0.03666	0.09435	-0.00301	0	-0.001505
g__norank_f__NS11-12_marine_group	0	0	0.001505	0.002631	0.03666	0.09435	-0.003387	0	-0.001505
g__Guggenheimella	0	0	0.001129	0.001818	0.03629	0.09435	-0.002258	0	-0.001129
g__Stenotrophomonas	0	0	0.001129	0.001818	0.03629	0.09435	-0.002258	-0.0003763	-0.001129
g__norank_f__norank_o__norank_c__WWE3	0	0	0.001129	0.001818	0.03629	0.09435	-0.002258	0	-0.001129
g__Desulfobulbus	0	0	0.001129	0.001818	0.03629	0.09435	-0.002258	0	-0.001129
