# Supplementary material for: Gut Microbiota and Related Metabolites Were Disturbed in Ulcerative Colitis and Partly Restored After Mesalamine Treatment
Source: Front Pharmacol. 2021 Jan 18;11:620724. doi: 10.3389/fphar.2020.620724 (PMC7898679; doi:10.3389/fphar.2020.620724)
Supplement: Supplementary file 2 [file table2.xlsx]

## Sheet: 两组差异检验统计表
Species name	Mesalamine-Mean(%)	Mesalamine-Sd(%)	UC-Mean(%)	UC-Sd(%)	Pvalue	Corrected pvalue	Lower ci	Upper ci	Effectsize
g__Streptococcus	1.807	2.428	11.24	10.63	0.0031	0.02889	-16.16	-3.459	-9.432
g__Megamonas	2.162	7.87	1.185	3.3	0.007074	0.04226	-3.112	6.187	0.9775
g__Clostridium_sensu_stricto_1	0.1941	0.3466	2.413	5.124	0.0279	0.1052	-5.931	-0.01318	-2.219
g__Enterococcus	0.1933	0.4913	1.602	3.562	0.01499	0.06468	-3.823	0.03954	-1.409
g__Prevotella_9	1.47	3.858	0.1276	0.2446	0.01915	0.08113	-0.1271	3.41	1.342
g__Dialister	1.406	2.496	0.0444	0.1186	0.008647	0.05037	0.2421	2.665	1.362
g__Citrobacter	0.02876	0.07751	0.963	2.503	0.0005475	0.007973	-2.624	-0.02974	-0.9342
g__Klebsiella	0.1763	0.3371	0.6476	1.051	0.04574	0.1276	-1.195	0.04462	-0.4713
g__Ruminococcaceae_UCG-014	0.7532	2.1	0.04177	0.05882	0.01046	0.05839	-0.06004	1.897	0.7113
g__Prevotella	0.6943	2.596	0.03838	0.06956	0.03329	0.1052	-0.07377	2.063	0.6559
g__Akkermansia	0.4492	1.681	0.03199	0.07886	0.00173	0.01715	-0.08015	1.34	0.4171
g__Actinomyces	0.07042	0.06825	0.3349	0.6161	0.009094	0.05232	-0.6848	-0.03085	-0.2645
g__Granulicatella	0.04435	0.06598	0.3308	0.6201	0.004051	0.02908	-0.7042	-0.02521	-0.2864
g__norank_f__Saccharimonadaceae	0.1019	0.2365	0.1795	0.1242	0.008274	0.04881	-0.1979	0.07504	-0.07762
g__Alistipes	0.1024	0.3476	0.1547	0.2009	0.002134	0.02072	-0.2421	0.1721	-0.05223
g__norank_f__norank_o__Chloroplast	0.2137	0.7909	0.04215	0.07312	0.0008952	0.01264	-0.08382	0.617	0.1716
g__Christensenellaceae_R-7_group	0.0887	0.3308	0.1509	0.434	0.003443	0.02908	-0.4186	0.2035	-0.06222
g__Pediococcus	0.07929	0.2967	0.1539	0.2708	0.0001451	0.003219	-0.2819	0.1626	-0.07463
g__norank_f__Muribaculaceae	0.01344	0.04921	0.1757	0.3207	0.0001527	0.003234	-0.3753	-0.03559	-0.1623
g__Bacillus	0.0005376	0.002011	0.1806	0.384	9.182e-06	0.00103	-0.4282	-0.04102	-0.1801
g__Rothia	0.04489	0.08999	0.1306	0.2159	0.03397	0.1052	-0.2287	0.03415	-0.08568
g__Staphylococcus	0.003225	0.008961	0.149	0.3166	5.142e-05	0.002396	-0.348	-0.0329	-0.1458
g__Enterobacter	0.03037	0.06674	0.1031	0.1687	0.0134	0.05893	-0.1976	0.01231	-0.07273
g__Slackia	0	0	0.1099	0.3281	0.03678	0.1052	-0.3231	0	-0.1098
g__Prochlorococcus_MIT9313	0	0	0.09144	0.1934	5.464e-06	0.0008487	-0.216	-0.02258	-0.09144
g__unclassified_f__Ruminococcaceae	0.01989	0.06399	0.06059	0.1066	0.006587	0.03986	-0.1193	0.02085	-0.04069
g__unclassified_f__Propionibacteriaceae	0	0	0.07225	0.1733	5.432e-06	0.0008487	-0.1852	-0.01167	-0.07225
g__norank_f__Ruminococcaceae	0.0129	0.03161	0.04591	0.08663	0.0496	0.1376	-0.09473	0.01005	-0.03301
g__unclassified_o__Lactobacillales	0.004032	0.008012	0.05456	0.09143	0.03849	0.1081	-0.1116	-0.005483	-0.05054
g__Prevotella_7	0	0	0.05645	0.1276	2.554e-05	0.001323	-0.1392	-0.01016	-0.05644
g__Aeromonas	0.001344	0.004071	0.04854	0.105	6.054e-05	0.002489	-0.1149	-0.009999	-0.0472
g__norank_f__Clostridiales_vadinBB60_group	0.0379	0.1418	0.01091	0.01864	0.00512	0.03224	-0.01994	0.1099	0.02698
g__norank_f__norank_o__SBR1031	0.0002688	0.001006	0.04704	0.1016	1.195e-05	0.00103	-0.1144	-0.01037	-0.04677
g__Solobacterium	0.008333	0.009699	0.03763	0.05997	0.03753	0.106	-0.06933	-0.001452	-0.02929
g__Cetobacterium	0	0	0.0444	0.09572	2.541e-05	0.001323	-0.1065	-0.01054	-0.0444
g__unclassified_f__Brocadiaceae	0	0	0.03951	0.09225	0.0001068	0.002489	-0.1001	-0.006774	-0.03951
g__norank_f__Desulfovibrionaceae	0	0	0.03575	0.07916	0.0001068	0.002489	-0.08769	-0.006774	-0.03575
g__Prevotellaceae_UCG-001	0	0	0.03349	0.07176	5.4e-06	0.0008487	-0.07978	-0.008655	-0.03349
g__Acinetobacter	0.0002688	0.001006	0.03312	0.06057	1.327e-05	0.00103	-0.07375	-0.009783	-0.03284
g__Weissella	0.00215	0.008046	0.0301	0.0543	0.009659	0.05489	-0.06548	-0.002366	-0.02796
g__Ruminococcaceae_UCG-005	0.01317	0.04928	0.01882	0.02643	0.01457	0.06346	-0.02973	0.02371	-0.005644
g__Vibrio	0	0	0.02935	0.06803	0.0001063	0.002489	-0.07375	-0.004892	-0.02935
g__norank_f__Barnesiellaceae	0	0	0.02408	0.03875	0.0001068	0.002489	-0.04928	-0.007149	-0.02408
g__Corynebacterium	0.001344	0.002803	0.02183	0.04601	0.02371	0.09609	-0.04956	-0.002043	-0.02048
g__Lactococcus	0.001075	0.003106	0.02107	0.05093	0.002752	0.02617	-0.05264	-0.001667	-0.02
g__Porphyromonas	0.0002688	0.001006	0.02145	0.05205	0.000287	0.005815	-0.05493	-0.003225	-0.02118
g__unclassified_f__Barnesiellaceae	0	0	0.0207	0.03504	0.00139	0.01478	-0.04515	-0.00301	-0.0207
g__Cloacibacterium	0	0	0.01882	0.04913	0.004414	0.02908	-0.05079	-0.001505	-0.01881
g__Rikenellaceae_RC9_gut_group	0	0	0.01806	0.03516	0.0001037	0.002489	-0.04178	-0.00414	-0.01807
g__Candidatus_Actinomarina	0	0	0.01806	0.03617	2.46e-05	0.001323	-0.04176	-0.004892	-0.01806
g__Prevotella_6	0	0	0.01806	0.04029	0.001378	0.01478	-0.04402	-0.00301	-0.01806
g__Corynebacterium_1	0.0005376	0.001367	0.01731	0.04172	0.004755	0.03078	-0.04452	-0.00172	-0.01678
g__Ruminiclostridium	0.01371	0.05129	0.003763	0.004345	0.0374	0.106	-0.005645	0.03887	0.009946
g__Flavobacterium	0	0	0.01693	0.03928	0.000398	0.005982	-0.04213	-0.002634	-0.01693
g__norank_f__norank_o__norank_c__WS6_Dojkabacteria	0	0	0.01656	0.03932	0.000398	0.005982	-0.04251	-0.002258	-0.01655
g__norank_f__Mitochondria	0.0002688	0.001006	0.01618	0.03951	0.00543	0.03374	-0.04213	-0.001452	-0.01591
g__Faecalibaculum	0	0	0.01618	0.02942	0.0003715	0.005982	-0.03537	-0.001882	-0.01618
g__norank_f__norank_o__JGI_0000069-P22	0	0	0.0143	0.03212	0.0001006	0.002489	-0.03538	-0.00301	-0.0143
g__Prevotella_1	0	0	0.0143	0.03087	0.0001022	0.002489	-0.03462	-0.00301	-0.0143
g__Helicobacter	0	0	0.01392	0.02601	0.0003715	0.005982	-0.02972	-0.001881	-0.01392
g__norank_f__JG30-KF-CM45	0	0	0.01392	0.02007	0.0001027	0.002489	-0.0286	-0.004892	-0.01392
g__Finegoldia	0.0005376	0.002011	0.01242	0.02515	0.02306	0.09428	-0.02903	-0.0005913	-0.01188
g__norank_f__norank_o__KF-JG30-C25	0	0	0.01242	0.0254	0.004431	0.02908	-0.02973	-0.001505	-0.01242
g__Leptotrichia	0	0	0.01204	0.03051	0.01311	0.05839	-0.03161	-0.0007526	-0.01204
g__Candidatus_Kuenenia	0	0	0.01167	0.02169	0.001396	0.01478	-0.02634	-0.002634	-0.01167
g__Truepera	0	0	0.01167	0.02646	0.0003872	0.005982	-0.02897	-0.002258	-0.01167
g__Tyzzerella	0.005376	0.02011	0.006021	0.008905	0.005106	0.03224	-0.01016	0.01349	-0.0006447
g__unclassified_f__Burkholderiaceae	0	0	0.01129	0.02279	0.000398	0.005982	-0.02634	-0.002634	-0.01129
g__Proteiniphilum	0	0	0.01091	0.02176	0.000389	0.005982	-0.02446	-0.002258	-0.01091
g__Alloprevotella	0	0	0.01091	0.0163	0.00139	0.01478	-0.02145	-0.003011	-0.01091
g__Tyzzerella_3	0	0	0.01016	0.02953	0.03666	0.1052	-0.02935	-0.0003763	-0.01016
g__Dubosiella	0	0	0.01016	0.0234	0.01316	0.05839	-0.02559	-0.0007526	-0.01016
g__Rikenella	0	0	0.009784	0.0141	0.000389	0.005982	-0.01881	-0.002634	-0.009784
g__Clade_Ia	0	0	0.009408	0.01433	0.0001037	0.002489	-0.01881	-0.003387	-0.009407
g__norank_f__A4b	0	0	0.009408	0.01749	0.001378	0.01478	-0.02032	-0.001882	-0.009408
g__OLB13	0	0	0.009031	0.01961	0.00438	0.02908	-0.0222	-0.001129	-0.009031
g__Novosphingobium	0	0	0.008655	0.02092	0.00438	0.02908	-0.0222	-0.0007526	-0.008655
g__W5053	0	0	0.008655	0.0172	0.004278	0.02908	-0.01994	-0.001505	-0.008655
g__Prevotellaceae_NK3B31_group	0	0	0.008655	0.0196	0.001344	0.01478	-0.02145	-0.001505	-0.008655
g__Neisseria	0	0	0.008279	0.01604	0.001378	0.01478	-0.01881	-0.001505	-0.008278
g__Leuconostoc	0.0002688	0.001006	0.007902	0.01235	0.001696	0.01715	-0.0158	-0.001613	-0.007634
g__Sphingomonas	0.0008064	0.002179	0.006774	0.01493	0.03434	0.1052	-0.01591	-0.0001077	-0.005967
g__norank_f__Rikenellaceae	0	0	0.00715	0.01621	0.00438	0.02908	-0.01806	-0.001129	-0.007149
g__Shuttleworthia	0.0002688	0.001006	0.006774	0.01046	0.001696	0.01715	-0.01365	-0.001613	-0.006504
g__norank_f__Bacteroidetes_vadinHA17	0.0002688	0.001006	0.006774	0.01493	0.006342	0.03889	-0.01656	-0.0008601	-0.006505
g__Intestinimonas	0.0005376	0.002011	0.006397	0.007743	0.01682	0.07191	-0.01075	-0.001505	-0.00586
g__Synergistes	0	0	0.006774	0.01239	0.01316	0.05839	-0.01468	-0.0007526	-0.006774
g__Coprococcus_2	0.001882	0.00704	0.004516	0.009183	0.03051	0.1052	-0.01016	0.00301	-0.002634
g__norank_f__Erysipelotrichaceae	0	0	0.006397	0.01164	0.01311	0.05839	-0.0143	-0.0003763	-0.006396
g__Acetobacter	0	0	0.006397	0.01765	0.03666	0.1052	-0.01769	0	-0.006397
g__norank_f__AEGEAN-169_marine_group	0	0	0.006021	0.01388	0.004278	0.02908	-0.01505	-0.0007526	-0.006021
g__Bryobacter	0	0	0.006021	0.01257	0.001288	0.01478	-0.0143	-0.001129	-0.00602
g__norank_f__norank_o__norank_c__Anaerolineae	0	0	0.006021	0.01269	0.00438	0.02908	-0.0143	-0.0007526	-0.00602
g__Trichococcus	0	0	0.006021	0.01528	0.03678	0.1052	-0.01618	0	-0.006021
g__Sedimentibacter	0	0	0.005645	0.01307	0.03678	0.1052	-0.01467	-0.0003763	-0.005644
g__Chryseobacterium	0	0	0.005645	0.0127	0.004278	0.02908	-0.01392	-0.0007526	-0.005644
g__Alteromonas	0	0	0.005645	0.007983	0.001373	0.01478	-0.01054	-0.001881	-0.005644
g__norank_f__JG30-KF-AS9	0	0	0.005645	0.01139	0.001288	0.01478	-0.01279	-0.001129	-0.005644
g__norank_f__norank_o__Gastranaerophilales	0	0	0.005268	0.01294	0.03678	0.1052	-0.01355	0	-0.005268
g__Limnohabitans	0	0	0.005268	0.00942	0.00438	0.02908	-0.01129	-0.0007526	-0.005268
g__Allobaculum	0	0	0.005268	0.01037	0.00438	0.02908	-0.01167	-0.0007526	-0.005268
g__Comamonas	0	0	0.005268	0.01282	0.01297	0.05839	-0.01355	-0.0003763	-0.005268
g__Muribaculum	0	0	0.004892	0.01177	0.03678	0.1052	-0.01242	0	-0.004892
g__Wolbachia	0	0	0.004892	0.01035	0.004278	0.02908	-0.01167	-0.0007526	-0.004892
g__Synechococcus_CC9902	0	0	0.004516	0.008283	0.01311	0.05839	-0.009783	-0.0007526	-0.004515
g__Chlamydia	0	0	0.004516	0.009183	0.004278	0.02908	-0.01053	-0.0007526	-0.004515
g__Propioniciclava	0	0	0.004516	0.009353	0.01311	0.05839	-0.01091	-0.0007526	-0.004515
g__Aurantimicrobium	0.0002688	0.001006	0.004139	0.008022	0.01998	0.0824	-0.009514	-0.0003225	-0.00387
g__unclassified_f__Caulobacteraceae	0.0002688	0.001006	0.004139	0.008022	0.01998	0.0824	-0.009246	-0.0005913	-0.00387
g__norank_f__norank_o__Acidobacteriales	0	0	0.004139	0.008022	0.004278	0.02908	-0.009407	-0.0007526	-0.004139
g__Fastidiosipila	0	0	0.004139	0.008216	0.01311	0.05839	-0.009783	-0.0007526	-0.004139
g__Arcobacter	0	0	0.004139	0.009462	0.03678	0.1052	-0.01016	0	-0.004139
g__norank_f__norank_o__SAR86_clade	0	0	0.004139	0.008405	0.03666	0.1052	-0.009407	0	-0.004139
g__norank_f__PHOS-HE36	0	0	0.003763	0.008129	0.01297	0.05839	-0.009407	-0.0003763	-0.003763
g__Arenimonas	0	0	0.003763	0.00687	0.004278	0.02908	-0.008655	-0.0007526	-0.003763
g__norank_f__F082	0	0	0.003763	0.006396	0.01311	0.05839	-0.007904	-0.0003763	-0.003764
g__Thermomonas	0	0	0.003763	0.005322	0.00438	0.02908	-0.00715	-0.001129	-0.003763
g__Nitrolancea	0	0	0.003763	0.008129	0.01297	0.05839	-0.009031	-0.0003763	-0.003763
g__Eikenella	0	0	0.003763	0.006396	0.01311	0.05839	-0.007903	-0.0003763	-0.003763
g__Fermentimonas	0	0	0.003763	0.007096	0.01311	0.05839	-0.008279	-0.0007526	-0.003763
g__Coriobacteriaceae_UCG-002	0	0	0.003387	0.006973	0.01297	0.05839	-0.007903	-0.0007526	-0.003387
g__Chujaibacter	0	0	0.003387	0.008216	0.03666	0.1052	-0.008654	0	-0.003387
g__norank_f__norank_o__Subgroup_2	0	0	0.003387	0.006973	0.01297	0.05839	-0.008279	-0.0003763	-0.003387
g__Limnobacter	0	0	0.003387	0.006003	0.01311	0.05839	-0.007151	-0.0003763	-0.003387
g__norank_f__norank_o__norank_c__KD4-96	0	0	0.003387	0.008216	0.03666	0.1052	-0.009031	0	-0.003387
g__norank_f__Bacteroidales_UCG-001	0	0	0.003387	0.006973	0.01297	0.05839	-0.007903	-0.0003763	-0.003387
g__Streptomyces	0	0	0.003387	0.008216	0.03666	0.1052	-0.008654	0	-0.003387
g__Campylobacter	0	0	0.003387	0.006973	0.01297	0.05839	-0.007903	-0.0003763	-0.003387
g__Mesotoga	0	0	0.003387	0.008216	0.03666	0.1052	-0.008654	-0.0003763	-0.003387
g__Sediminibacterium	0	0	0.003387	0.008216	0.03666	0.1052	-0.008654	0	-0.003387
g__Ellin6067	0	0	0.003387	0.004505	0.001288	0.01478	-0.00602	-0.001129	-0.003386
g__Treponema_2	0	0	0.00301	0.007051	0.03666	0.1052	-0.007526	0	-0.003011
g__Burkholderia-Caballeronia-Paraburkholderia	0	0	0.00301	0.003886	0.00438	0.02908	-0.005645	-0.0007526	-0.00301
g__Extensimonas	0	0	0.00301	0.004954	0.01311	0.05839	-0.006396	-0.0003763	-0.00301
g__norank_f__ST-12K33	0	0	0.00301	0.007051	0.03666	0.1052	-0.008279	0	-0.003011
g__dgA-11_gut_group	0	0	0.00301	0.00583	0.01297	0.05839	-0.007151	-0.0003763	-0.003011
g__norank_f__norank_o__norank_c__Latescibacteria	0	0	0.002634	0.00471	0.01297	0.05839	-0.00602	-0.0003763	-0.002634
g__Clostridium_sensu_stricto_3	0	0	0.002634	0.005897	0.03666	0.1052	-0.006775	-0.0003763	-0.002635
g__Halomonas	0	0	0.002634	0.005897	0.03666	0.1052	-0.006775	0	-0.002635
g__norank_f__norank_o__SJA-15	0	0	0.002634	0.005897	0.03666	0.1052	-0.006775	-0.0003763	-0.002635
g__norank_f__norank_o__norank_c__c5LKS83	0	0	0.002634	0.005033	0.03678	0.1052	-0.00602	0	-0.002634
g__Sva0996_marine_group	0	0	0.002634	0.005897	0.03666	0.1052	-0.006775	0	-0.002635
g__Defluviitaleaceae_UCG-011	0	0	0.002634	0.003098	0.004363	0.02908	-0.004515	-0.001129	-0.002634
g__Anaerofilum	0.0002688	0.001006	0.002258	0.002631	0.01998	0.0824	-0.00387	-0.0003763	-0.001989
g__Macellibacteroides	0	0	0.002258	0.004045	0.03678	0.1052	-0.004892	0	-0.002258
g__norank_f__norank_o__NB1-j	0	0	0.002258	0.00476	0.03666	0.1052	-0.005267	0	-0.002258
g__Ralstonia	0	0	0.002258	0.002631	0.004278	0.02908	-0.003763	-0.0007526	-0.002258
g__norank_f__Prolixibacteraceae	0	0	0.001882	0.003657	0.03666	0.1052	-0.004139	0	-0.001882
g__norank_f__Anaerolineaceae	0	0	0.001882	0.003657	0.03666	0.1052	-0.004516	-0.0003763	-0.001882
g__norank_f__Rhodothermaceae	0	0	0.001882	0.003198	0.03666	0.1052	-0.004139	0	-0.001882
g__Stenotrophobacter	0	0	0.001882	0.003657	0.03666	0.1052	-0.004139	0	-0.001882
g__norank_f__DEV007	0	0	0.001882	0.003657	0.03666	0.1052	-0.004139	-0.0003763	-0.001882
g__Blvii28_wastewater-sludge_group	0	0	0.001882	0.003657	0.03666	0.1052	-0.004139	-0.0003763	-0.001882
g__Aerococcus	0	0	0.001882	0.003657	0.03666	0.1052	-0.004516	0	-0.001882
g__Brevundimonas	0	0	0.001882	0.003198	0.03666	0.1052	-0.003763	-0.0003763	-0.001882
g__unclassified_o__Saccharimonadales	0	0	0.001882	0.003657	0.03666	0.1052	-0.004516	0	-0.001882
g__unclassified_f__Sphingomonadaceae	0	0	0.001882	0.003657	0.03666	0.1052	-0.00414	0	-0.001882
g__norank_f__Saprospiraceae	0	0	0.001505	0.002631	0.03666	0.1052	-0.00301	0	-0.001505
g__Polynucleobacter	0	0	0.001505	0.001943	0.01269	0.05839	-0.002634	-0.0003763	-0.001505
g__Denitratisoma	0	0	0.001505	0.002631	0.03666	0.1052	-0.00301	-0.0003763	-0.001505
g__Prevotella_2	0	0	0.001505	0.002631	0.03666	0.1052	-0.003387	0	-0.001505
g__norank_f__NS9_marine_group	0	0	0.001505	0.002631	0.03666	0.1052	-0.003387	0	-0.001505
g__norank_f__NS11-12_marine_group	0	0	0.001505	0.002631	0.03666	0.1052	-0.00301	0	-0.001505
g__Guggenheimella	0	0	0.001129	0.001818	0.03629	0.1052	-0.002258	0	-0.001129
g__Stenotrophomonas	0	0	0.001129	0.001818	0.03629	0.1052	-0.002258	0	-0.001129
g__norank_f__norank_o__norank_c__WWE3	0	0	0.001129	0.001818	0.03629	0.1052	-0.002258	0	-0.001129
g__Desulfobulbus	0	0	0.001129	0.001818	0.03629	0.1052	-0.002258	0	-0.001129
g__Propionibacterium	0	0	0.001129	0.001818	0.03629	0.1052	-0.002258	0	-0.001129
