# Supplementary material for: Gut Microbiota and Related Metabolites Were Disturbed in Ulcerative Colitis and Partly Restored After Mesalamine Treatment
Source: Front Pharmacol. 2021 Jan 18;11:620724. doi: 10.3389/fphar.2020.620724 (PMC7898679; doi:10.3389/fphar.2020.620724)
Supplement: Supplementary file 3 [file table3.xlsx]

## Sheet: 组间差异详情表
ID	Metabolite	Metab ID	KEGG Compound ID	Library ID	M/Z	Mode	Adducts	Formula	Retention time	CAS ID	KEGG Compound First Category	KEGG Compound Second Category	KEGG Pathway ID	KEGG Pathway First Category	KEGG Pathway Second Category	HMDB Superclass	HMDB Class	HMDB Subclass	VIP_pred_OPLS-DA	VIP_PLS-DA	FC(C/N)	P_value	FDR	C01	C02	C03	C04	C05	C06	C07	C08	C09	C10	C11	C12	C13	C14	N01	N02	N03	N04	N05	N06	N07	N08	N09	N10
pos_18114	Creatine	metab_79	C00300	HMDB0000064	132.077	pos	M+H	C4H9N3O2	0.6717	57-00-1	-	-	map01100;map00330;map00260	Metabolism;Metabolism;Metabolism	Global and overview maps;Amino acid metabolism;Amino acid metabolism	Organic acids and derivatives	Carboxylic acids and derivatives	Amino acids, peptides, and analogues	2.3875	2.3988	0.2786	1.604e-07	4.056e-06	0.0169	2.6378	0.0167	4.5409	3.5511	3.1524	0.0182	3.567	0.0119	0.0164	2.4375	3.6796	0.016	0.0135	4.8776	6.6702	6.7473	6.7988	6.4295	6.4921	5.281	5.8822	6.308	5.214
pos_7494	D-Urobilin	metab_94	C05795	HMDB0004161	611.286	pos	M+Na	C33H40N4O6	7.45105	3947-38-4	-	-	map01100;map01110;map00860	Metabolism;Metabolism;Metabolism	Global and overview maps;Global and overview maps;Metabolism of cofactors and vitamins	Organoheterocyclic compounds	Tetrapyrroles and derivatives	Bilirubins	2.2973	2.2659	0.3611	9.151e-07	1.552e-05	4.1156	0.5007	0.5492	0.5001	4.037	0.4922	3.7704	3.9799	0.4463	3.3409	4.2913	0.5163	0.5345	5.0012	7.0913	6.1454	5.9497	5.438	6.5376	7.4034	6.3766	5.1992	6.7358	6.5637
neg_9501	Ascorbyl stearate	metab_261	-	LMFA07010789;HMDB0038242	477.258	neg	M+Cl	C24H42O7	8.68797	10605-09-1	-	-	-	-	-	Lipids and lipid-like molecules	Fatty Acyls	Fatty acid esters	2.2863	2.2771	0.3236	6.696e-11	3.386e-09	2.3651	0.9314	1.0938	2.115	1.0673	1.1209	1.9099	2.3412	3.9813	1.2057	2.9641	0.8486	1.243	0.9662	6.4291	4.8977	5.1911	5.1202	5.35	5.889	5.0798	4.5569	5.7166	5.066
pos_14741	Petasinine	metab_175	-	HMDB0030516	222.147	pos	M+H-H2O	C13H21NO3	4.108	70474-33-8	-	-	-	-	-	Organoheterocyclic compounds	Pyrrolizidines	-	2.2675	2.2595	0.4417	6.82e-12	6.035e-10	4.28	2.1232	2.7069	3.483	2.9712	2.1108	2.2278	2.133	2.3355	2.3931	4.0462	3.4742	2.2416	2.0986	6.8221	5.9236	5.791	6.1394	5.9198	6.9442	6.712	5.2883	6.2162	6.7073
pos_16799	N-Methyl-14-O-demethylepiporphyroxine	metab_153	-	HMDB0030171	410.098	pos	M+K	C20H21NO6	2.95458	18361-67-6	-	-	-	-	-	Alkaloids and derivatives	Rhoeadine alkaloids	-	2.228	2.2405	0.2823	4.464e-05	0.0002926	2.4767	1.3475	1.4138	1.3466	1.4277	1.3356	1.4486	1.3569	1.2695	1.4065	1.3087	1.3692	1.394	1.3239	3.929	3.2646	5.1406	4.9672	3.2583	3.6314	5.779	7.7206	7.2464	6.2565
pos_17799	6-Acetyl-2,3-dihydro-2-(hydroxymethyl)-4(1H)-pyridinone	metab_36	-	HMDB0035178	152.071	pos	M+H-H2O	C8H11NO3	2.07833	214218-63-0	-	-	-	-	-	Organoheterocyclic compounds	Pyridines and derivatives	Hydropyridines	2.211	2.2094	0.3113	1.666e-11	9.831e-10	1.466	1.3956	1.4622	1.3947	1.4761	1.3836	1.4971	1.405	1.3172	1.4548	1.3565	1.4173	1.4423	1.3718	4.6748	3.9866	4.2399	4.6825	4.7701	4.7527	4.459	4.4446	4.6874	4.8232
pos_1273	N-Phenylacetylglutamic acid	metab_157	-	HMDB0059772	553.18	pos	M+Na, 2M+Na	C13H15NO5	3.95947	-	-	-	-	-	-	Organic acids and derivatives	Carboxylic acids and derivatives	Amino acids, peptides, and analogues	2.1715	2.1694	0.1499	3.133e-10	1.386e-08	1.5693	0.1512	0.1727	0.1509	0.1775	0.1476	0.1849	0.1541	0.1286	0.1702	0.1396	2.8637	0.166	1.9957	4.1145	5.4174	3.5444	3.7869	3.9782	3.4452	3.58	4.2863	3.2582	3.5333
pos_15236	L-Isoleucine	metab_122	C00407	HMDB0000172;HMDB0000557	132.102	pos	M+H	C6H13NO2	3.95947	73-32-5	Peptides	Amino acids	map01100;map04978;map01110;map00280;map00290;map00460;map00960;map02010;map01230;map00966;map01210;map04974;map00970;map01130;map05230;map01064;map01060	Metabolism;Organismal Systems;Metabolism;Metabolism;Metabolism;Metabolism;Metabolism;Environmental Information Processing;Metabolism;Metabolism;Metabolism;Organismal Systems;Genetic Information Processing;Metabolism;Human Diseases;Metabolism;Metabolism	Global and overview maps;Digestive system;Global and overview maps;Amino acid metabolism;Amino acid metabolism;Metabolism of other amino acids;Biosynthesis of other secondary metabolites;Membrane transport;Global and overview maps;Biosynthesis of other secondary metabolites;Global and overview maps;Digestive system;Translation;Global and overview maps;Cancers: Overview;Chemical structure transfor…	Organic acids and derivatives	Carboxylic acids and derivatives	Amino acids, peptides, and analogues	2.1245	2.1309	0.5193	1.15e-14	2.035e-12	2.7965	3.5183	3.6379	3.6147	3.6804	3.3179	2.7692	3.9323	3.5398	3.5358	3.192	2.6471	3.1639	2.1482	6.4115	7.0747	6.082	6.1842	6.131	6.261	5.9998	6.1252	6.1145	6.1991
neg_5448	Simvastatin hydroxy acid	metab_374	-	HMDB0061047	435.273	neg	M-H	C25H40O6	5.88958	-	-	-	-	-	-	Organic acids and derivatives	Hydroxy acids and derivatives	Medium-chain hydroxy acids and derivatives	2.1169	2.1268	2.0906	4.899e-06	5.37e-05	6.2908	6.3407	6.4518	5.7978	5.8486	6.2858	6.3266	5.7874	5.4685	6.5314	6.1905	5.7519	6.0405	6.1808	2.8368	2.353	2.3975	2.5284	6.033	2.7086	2.4421	2.3781	2.7528	2.7054
pos_12620	2-Hydroxy-3-methoxyestrone	metab_16	-	HMDB0011195	406.328	pos	M+H-2H2O	C25H47NO5	6.39092	-	-	-	-	-	-	Organic acids and derivatives	Hydroxy acids and derivatives	Beta hydroxy acids and derivatives	2.032	2.0449	6.9453	0.0001403	0.0007305	3.5759	4.3915	3.2832	2.668	2.564	4.4574	4.4346	3.7596	3.8085	4.985	4.0246	3.4204	4.7447	4.0853	0.0046	0.0022	0.0022	0.0034	5.549	0.0033	0.0027	0.0022	0.0025	0.0031
neg_9256	LysoPC(20:1(11Z))	metab_321	C04230	HMDB0010391	594.374	neg	M+FA-H	C28H56NO7P	8.96318	-	Lipids	Phospholipids	map00564;map05231	Metabolism;Human Diseases	Lipid metabolism;Cancers: Overview	Lipids and lipid-like molecules	Glycerophospholipids	Glycerophosphocholines	2.0292	2.0041	0.4556	7.681e-10	3.021e-08	2.3735	4.5935	2.0337	1.7901	3.3691	2.0629	2.2162	1.8415	1.7143	2.1532	1.8737	1.7622	2.1926	3.4921	5.6663	6.1338	5.4633	4.3544	5.3655	5.5946	4.8622	4.8784	5.0777	5.0873
neg_7546	DG(20:3n9/0:0/18:2n6)	metab_281	-	HMDB0056237	701.532	neg	M+FA-H	C42H72O5	11.3211	-	-	-	-	-	-	Lipids and lipid-like molecules	Fatty Acyls	Eicosanoids	2.0148	2.0323	1.8034	1.942e-06	2.455e-05	6.3798	6.5546	6.809	6.0377	6.1032	6.8284	6.884	6.7293	5.663	7.0027	6.9634	6.4436	6.9198	6.2211	3.5103	2.2229	4.5085	3.2001	4.0262	3.9861	3.4412	2.248	3.6513	5.47
pos_13840	Bilirubin glucuronide	metab_62	C03374;C03033	HMDB0060169;HMDB0010332	761.297	pos	M+H	C39H44N4O12	4.87708	-	-	-	map01100;map00040;map04976	Metabolism;Metabolism;Organismal Systems	Global and overview maps;Carbohydrate metabolism;Digestive system	Organoheterocyclic compounds	Tetrapyrroles and derivatives	Bilirubins	1.9862	1.991	0.3642	5.006e-06	5.37e-05	0.5881	0.5351	0.5851	4.0122	1.969	0.5263	0.6122	3.1153	0.4786	2.4703	2.325	3.6938	1.7419	2.8631	4.1317	6.6426	6.5953	3.1531	3.5273	5.3421	4.2135	5.9292	4.9897	5.5229
pos_6357	3-Carboxy-2,3,4,9-tetrahydro-1H-pyrido[3,4-b]indole-1-propanoic acid	metab_23	-	HMDB0034881	289.119	pos	M+H	C15H16N2O4	4.4692	-	-	-	-	-	-	Alkaloids and derivatives	Harmala alkaloids	-	1.9714	2.0054	0.1719	2.251e-07	4.981e-06	1.0383	0	0	1.1517	0	0	3.7762	0	0	2.984	0	0	0	0	4.3154	2.5743	2.1063	4.7398	3.9456	3.6645	4.2648	4.1226	3.6097	3.8542
pos_17246	Hawkinsin	metab_107	-	HMDB0002354	355.093	pos	M+ACN+Na	C11H17NO6S	2.48122	63224-90-8	-	-	-	-	-	Organic acids and derivatives	Carboxylic acids and derivatives	Amino acids, peptides, and analogues	1.9646	1.9777	0.145	0.0003575	0.001395	0.5536	0.5021	0.5507	0.5015	0.5611	0.4936	0.577	0.5089	0.4476	0.5453	0.4746	0.5178	0.536	0.4853	1.4725	0.0176	4.8943	5.237	3.6047	2.5637	4.0714	5.3527	4.685	3.8377
neg_13684	Marmesin rhamnoside	metab_329	-	HMDB0039564	373.13	neg	M-H2O-H	C20H24O8	3.48705	142347-99-7	-	-	-	-	-	Phenylpropanoids and polyketides	Coumarins and derivatives	Furanocoumarins	1.961	1.9667	3.233	0.001019	0.00334	4.3053	4.8651	4.6995	4.2684	4.5446	4.6021	4.956	4.6606	4.5698	4.6951	4.5214	4.4193	5.1818	4.9843	2.4425	1.5399	0.0125	4.5821	0.0366	0.0252	0.0138	0.0119	0.0278	5.7276
pos_12175	Oleoyl Ethanolamide	metab_161	-	-	326.305	pos	M+H	C20H39NO2	7.10043	-	-	-	-	-	-	-	-	-	1.9187	1.9432	0.5258	1.082e-08	3.191e-07	2.7896	1.8645	3.7489	3.436	4.0007	4.3928	2.9039	1.8742	1.7837	4.1927	1.8243	2.825	3.5531	3.6727	6.9527	5.1051	5.6134	5.2022	5.8999	6.4479	5.9322	6.1888	5.6109	5.2911
pos_492	Latanoprost ethyl amide	metab_119	-	-	418.295	pos	M+H, 2M+ACN+H, M+Na	C25H39NO4	9.13558	-	-	-	-	-	-	-	-	-	1.9137	1.8962	2.8322	0.00315	0.008512	5.3164	4.6229	5.3603	5.3569	5.4395	5.1773	5.1954	4.8728	4.9543	5.1556	4.7437	4.955	4.5712	4.4609	0.2472	0.1344	5.4575	5.741	0.1691	0.1919	5.2898	0.1337	0.1498	0.1808
pos_6813	Crucigasterin 277	metab_80	-	LMSP01080036	278.248	pos	M+H	C18H31NO	5.61142	-	-	-	-	-	-	-	-	-	1.9066	1.9076	0.5677	1.321e-11	9.354e-10	3.6373	2.9607	3.536	4.2075	3.5472	3.0418	2.7668	2.6715	2.7127	2.7231	3.7738	4.2106	2.7101	2.9008	5.6924	5.7897	5.9252	5.9271	5.8055	5.1811	5.5438	5.6735	5.6876	5.9001
neg_15067	Neoacrimarine F	metab_347	-	HMDB0031112	530.142	neg	M-H	C29H25NO9	1.14703	195057-36-4	-	-	-	-	-	Organoheterocyclic compounds	Quinolines and derivatives	Benzoquinolines	1.8833	1.891	2.4974	0.0003208	0.001305	4.8319	4.5875	5.0672	3.7985	4.812	5.1812	4.9506	4.5858	4.2283	4.8598	4.6294	4.6327	5.0385	4.9503	1.2417	0.8049	5.8598	3.1303	2.7724	1.1217	0.8815	0.8263	1.1628	1.1187
neg_10291	D8'-Merulinic acid A	metab_277	-	HMDB0041454	779.547	neg	2M-H	C24H38O4	7.5752	69506-65-6	-	-	-	-	-	Benzenoids	Benzene and substituted derivatives	Benzoic acids and derivatives	1.8686	1.8847	1.7459	1.078e-05	8.483e-05	5.4013	6.0126	6.1228	5.73	5.8863	6.1333	6.4497	5.887	5.9366	5.9235	6.7037	5.4339	6.2314	6.6259	3.1046	2.6202	2.6648	3.8195	3.3514	2.9762	4.6023	2.6454	3.0205	5.7594
neg_3421	Portulacaxanthin II	metab_367	C08565	HMDB0012281	373.106	neg	M-H	C18H18N2O7	2.3556	-	-	-	map01110;map00965	Metabolism;Metabolism	Global and overview maps;Biosynthesis of other secondary metabolites	Organic acids and derivatives	Carboxylic acids and derivatives	Amino acids, peptides, and analogues	1.7979	1.8014	1.8394	2.314e-06	2.825e-05	4.8294	5.1044	5.0742	4.821	5.1735	5.4871	4.9838	4.998	4.7664	5.4081	5.5452	4.1146	5.3563	5.2286	2.6238	3.0609	3.0135	2.6336	1.3315	2.4104	3.9831	2.2175	3.9514	2.3049
neg_1777	Stearoyllactic acid	metab_379	-	HMDB0033372;LMFA07011021	377.242	neg	M-H, M+Na-2H	C21H40O4	9.87463	4253-64-9	-	-	-	-	-	Lipids and lipid-like molecules	Fatty Acyls	Fatty acid esters	1.78	1.7824	1.8332	0.0001032	0.0005708	5.32	4.6844	5.4192	5.1076	5.3696	5.6842	5.6359	5.2887	5.6905	5.7145	5.5953	5.0888	5.3737	4.6656	5.0254	2.0475	1.8339	3.1426	3.7653	2.1426	1.8781	1.8148	2.7609	4.6671
neg_15392	N2-Fructopyranosylarginine	metab_338	-	HMDB0041541	335.155	neg	M-H	C12H24N4O7	0.6106	162966-07-6	-	-	-	-	-	Organic acids and derivatives	Carboxylic acids and derivatives	Amino acids, peptides, and analogues	1.7631	1.7625	0.4753	4.612e-07	9.069e-06	0.9987	0.9547	1.5979	2.4506	2.381	3.5895	1.2902	3.4808	0.8293	2.9911	2.7611	0.8712	2.9318	3.6733	5.6287	4.0979	4.2019	4.0319	4.9775	4.8307	4.4776	4.8454	4.6583	4.5357
pos_8029	(3beta,11alpha,13beta)-3,11,13-Oleananetriol	metab_3	-	HMDB0034521	461.397	pos	M+H	C30H52O3	8.72625	85643-69-2	-	-	-	-	-	Lipids and lipid-like molecules	Prenol lipids	Triterpenoids	1.7525	1.7613	2.6374	0.003876	0.01024	4.6186	5.2126	4.9465	4.8561	4.7384	5.075	4.9327	4.396	3.0524	5.5443	5.2695	3.856	4.3136	4.7638	5.0267	0.0004	3.5407	0.0006	0.0005	5.8608	3.3252	0.0004	0.0005	0.0006
pos_7702	4,4-Dimethylcholesta-8,14,24-trienol	metab_26	C11455	HMDB0001023	411.36	pos	M+H	C29H46O	8.02495	64284-64-6	-	-	map01100;map01130;map00100	Metabolism;Metabolism;Metabolism	Global and overview maps;Global and overview maps;Lipid metabolism	Lipids and lipid-like molecules	Steroids and steroid derivatives	Cholestane steroids	1.7339	1.7356	1.4686	3.77e-09	1.335e-07	6.4435	6.4449	6.7285	5.7313	6.7382	6.6426	6.6604	6.579	5.9362	6.6985	6.3373	6.4326	6.5953	5.9778	5.3336	4.1667	4.428	3.7023	4.2652	4.1818	4.2919	3.9306	4.7795	4.6748
pos_11789	Ankorine	metab_50	C09337	-	336.219	pos	M+H	C19H29NO4	7.65798	-	-	-	map00950	Metabolism	Biosynthesis of other secondary metabolites	-	-	-	1.71	1.694	2.7209	0.001371	0.004257	4.1863	3.9213	3.9946	4.0102	3.4792	3.5572	3.7281	3.6735	4.3674	4.0859	3.3442	4.2593	3.5121	4.1993	1.0826	0.7957	0.8037	6.2973	0.897	0.956	0.8688	0.7933	0.8425	0.9278
neg_8965	CPA(18:0/0:0)	metab_273	-	HMDB0007004	419.253	neg	M-H	C21H41O6P	9.33725	-	-	-	-	-	-	Lipids and lipid-like molecules	Glycerophospholipids	Glycerophosphates	1.7069	1.6974	0.5871	9.103e-06	7.447e-05	3.1674	3.9717	4.7341	4.0138	1.7948	3.782	4.2245	3.7698	4.826	1.1274	5.262	2.8168	3.9042	0.8921	6.1554	6.6008	6.218	5.175	5.547	5.5471	5.5019	5.827	5.9395	6.239
neg_4006	Nomilinic acid 17-glucoside	metab_349	-	HMDB0037892	747.262	neg	M+Cl	C34H48O16	3.45345	113301-65-8	-	-	-	-	-	Lipids and lipid-like molecules	Saccharolipids	-	1.6878	1.6651	1.9153	0.002639	0.007392	4.7906	4.9963	4.8086	4.7705	5.1996	5.5137	5.6657	5.1472	5.3349	5.6089	5.2087	5.1111	5.5069	4.8713	3.7481	1.9131	0.4276	0.5144	5.3052	3.9023	3.1295	5.5412	0.682	1.8872
pos_13828	Cucurbitachrome 1	metab_81	-	HMDB0041581	645.393	pos	M+2Na-H	C40H56O4	4.88698	181229-73-2	-	-	-	-	-	Lipids and lipid-like molecules	Prenol lipids	Tetraterpenoids	1.6601	1.6161	2.5159	0.001682	0.005001	4.3201	5.0823	4.7122	3.6474	3.4314	4.2703	4.5908	3.3557	3.9022	4.8027	3.0273	3.6717	4.1553	2.3986	0.9334	3.8562	0.6687	0.816	0.7563	0.8122	0.7298	5.6611	0.705	0.7855
pos_231	Corey PG-Lactone Diol	metab_78	-	-	269.175	pos	M+H, M+ACN+Na, M+H-H2O	C15H24O4	2.56685	-	-	-	-	-	-	-	-	-	1.6584	1.664	1.6951	0.000298	0.001227	5.5563	5.5556	5.5447	5.5725	5.0752	5.8945	4.9347	5.1277	5.3234	4.6894	5.2375	5.5947	5.2687	5.7326	4.7326	2.0478	1.7733	4.9664	3.7804	2.1974	3.9385	1.7612	2.4246	4.0272
pos_17887	Arginyl-Proline	metab_54	-	HMDB0028717	254.161	pos	M+H-H2O	C11H21N5O3	1.21818	-	-	-	-	-	-	Organic acids and derivatives	Carboxylic acids and derivatives	Amino acids, peptides, and analogues	1.6564	1.6494	0.5639	1.065e-06	1.639e-05	3.0642	1.9599	1.5172	2.4641	1.5313	3.1304	2.7874	3.8317	2.0843	2.6804	4.225	3.4044	2.3031	3.8733	6.0763	4.583	4.2307	5.5514	4.4099	5.4216	3.7469	5.2839	4.7499	5.1567
neg_3236	3-(3,4-Dihydroxyphenyl)lactic acid	metab_234	C01207	HMDB0003503	197.046	neg	M-H	C9H10O5	1.79185	23028-17-3	-	-	map00350	Metabolism	Amino acid metabolism	Phenylpropanoids and polyketides	Phenylpropanoic acids	-	1.6368	1.616	0.5121	1.106e-05	8.515e-05	1.7647	3.2224	2.5655	2.1995	0.8711	3.6951	1.5951	0.7318	0.6295	3.7122	3.5083	2.9171	1.039	4.3592	4.9803	3.7941	3.9199	4.3449	5.3229	5.01	4.3797	4.3754	5.2325	4.4127
pos_31	Linoleoyl Ethanolamide	metab_121	C13828	HMDB0012252;HMDB0013624	324.29	pos	M+H, M+K, 2M+H, 2M+Na, M+Na	C20H37NO2	8.27383	68171-52-8	-	-	-	-	-	Organic nitrogen compounds	Organonitrogen compounds	Amines	1.6218	1.6179	1.4777	7.949e-06	7.447e-05	6.6474	5.929	5.7331	7.1737	6.4259	6.2914	5.5304	6.4708	4.9207	6.0001	7.1263	6.2005	6.4495	6.7198	5.449	2.918	4.1611	3.4814	4.0287	5.2244	4.5285	5.1406	3.7679	3.6489
neg_5924	Notoginsenoside R10	metab_351	-	HMDB0039051	589.31	neg	M+Cl	C30H50O9	6.9282	335157-20-5	-	-	-	-	-	Lipids and lipid-like molecules	Steroids and steroid derivatives	Steroidal glycosides	1.5918	1.6224	0.5732	0.0002075	0.0009663	0.4787	4.5609	4.5462	2.4597	2.7725	4.4473	4.339	4.6664	4.5902	5.3517	0.4582	0.3878	5.6874	2.6054	5.8893	4.8665	5.691	5.5312	6.4899	6.2767	5.2092	7.0189	6.3096	5.7222
pos_17428	2-hydroxyphenylpropionylglycine	metab_18	-	HMDB0094723	224.092	pos	M+H	C11H13NO4	2.32322	-	-	-	-	-	-	Organic acids and derivatives	Carboxylic acids and derivatives	Amino acids, peptides, and analogues	1.5871	1.5665	0.3979	0.0001287	0.0006905	0.0361	2.7325	3.1971	0.6868	2.371	0.0299	2.037	3.1776	1.9095	0.2353	2.9477	0.0323	0.0342	1.4164	3.789	0.9875	3.2011	4.7068	3.6037	4.4815	4.4644	4.073	3.7173	4.3963
pos_17689	Styrene	metab_200	C07083;C19506	HMDB0034240	105.07	pos	M+H	C8H8	2.16362	100-42-5	-	-	map01100;map01220;map01120;map00642;map00643	Metabolism;Metabolism;Metabolism;Metabolism;Metabolism	Global and overview maps;Global and overview maps;Global and overview maps;Xenobiotics biodegradation and metabolism;Xenobiotics biodegradation and metabolism	Benzenoids	Benzene and substituted derivatives	Styrenes	1.5487	1.5142	0.5748	5.064e-05	0.0003091	4.8125	2.6134	4.3793	4.2282	2.0174	1.4305	1.5445	2.0213	1.3637	1.5919	3.1206	2.0166	3.4613	4.8331	5.752	4.5674	4.9007	4.0989	6.0343	5.2729	5.1106	4.2008	4.9448	4.1229
neg_13958	Cynaroside A	metab_276	-	HMDB0040532	465.177	neg	M+Na-2H	C21H32O10	3.14673	117804-06-5	-	-	-	-	-	Lipids and lipid-like molecules	Prenol lipids	Terpene lactones	1.5399	1.5135	1.7559	0.0008292	0.002878	4.2131	4.33	4.714	4.4923	4.8667	4.6355	4.2459	4.6215	4.3041	4.3938	4.275	3.6438	4.8564	4.9527	2.5586	3.1549	1.4154	1.5424	1.8841	3.0178	2.7518	5.6368	1.7622	1.7156
pos_1543	9,10,13-Trihydroxystearic acid	metab_40	-	HMDB0030935	355.263	pos	M+H, M+Na	C18H36O5	4.95625	50439-74-2	-	-	-	-	-	Lipids and lipid-like molecules	Fatty Acyls	Fatty acids and conjugates	1.5393	1.5466	1.4815	1.812e-05	0.0001309	6.3732	5.0984	5.4589	6.1999	6.1446	5.2377	5.4699	5.8875	4.8727	5.3172	5.9685	5.7721	5.3288	5.5248	4.3505	2.6217	3.2625	3.8003	3.4623	3.6559	4.9061	2.7376	4.7597	4.3646
neg_2597	(-)-Stercobilin	metab_212	-	HMDB0240259	593.331	neg	M-H, M+Cl	C33H46N4O6	3.74378	-	-	-	-	-	-	Organoheterocyclic compounds	Tetrapyrroles and derivatives	Bilirubins	1.5387	1.5335	1.602	0.001419	0.004369	4.4954	7.241	7.0688	4.5423	5.2268	6.2009	6.9126	6.5592	6.915	7.2491	4.9431	5.162	7.2103	4.62	4.3481	3.8834	2.5973	6.1799	0.7214	3.8577	3.5725	2.7109	3.8518	5.8822
neg_15301	P-Acetamidophenol (Acetaminophen, Tylenol)	metab_356	-	-	150.056	neg	M-H	C8H9NO2	0.705417	-	-	-	-	-	-	-	-	-	1.5385	1.545	0.5701	0.0005474	0.001958	3.7471	2.151	2.0168	3.578	3.4714	2.1444	1.0662	2.8293	2.91	2.7408	3.0045	3.0935	3.7866	2.5332	4.2465	3.6537	6.6809	6.7923	4.2878	4.1917	6.9088	3.9509	4.0735	4.1691
pos_650	DEHYDRO (11,12)URSOLIC ACID LACTONE	metab_83	-	-	455.351	pos	M+H-H2O, M+H, M+H-2H2O	C30H46O3	7.36745	-	-	-	-	-	-	-	-	-	1.5216	1.5293	1.4198	0.0001645	0.0008203	6.083	6.4123	6.366	5.8223	6.3106	6.1304	6.3554	5.9734	5.8112	6.3563	6.1207	6.0038	6.0874	5.6429	4.9614	3.4009	3.4104	4.6131	3.7188	4.2796	3.9858	3.3981	6.4014	4.8335
pos_8174	Isozeaxanthin	metab_114	-	HMDB0036922	551.424	pos	M+H-H2O	C40H56O2	9.07582	29065-03-0	-	-	-	-	-	Lipids and lipid-like molecules	Prenol lipids	Tetraterpenoids	1.5213	1.5345	1.4046	9.101e-06	7.447e-05	5.999	5.7051	6.1332	5.8299	6.2449	5.9619	5.6944	6.4995	5.2216	5.9252	6.4019	6.3666	6.1783	6.4596	3.7277	3.6137	5.0654	3.3128	4.5044	5.1458	5.2602	4.069	3.7774	4.5519
pos_16422	Indole	metab_110	C19907;C00463	HMDB0000738;HMDB0035924	118.065	pos	M+H	C8H7N	3.29743	120-72-9	-	-	map01100;map01110;map04974;map00402;map00400;map00380	Metabolism;Metabolism;Organismal Systems;Metabolism;Metabolism;Metabolism	Global and overview maps;Global and overview maps;Digestive system;Biosynthesis of other secondary metabolites;Amino acid metabolism;Amino acid metabolism	Organoheterocyclic compounds	Indoles and derivatives	Indoles	1.4974	1.4953	0.6595	2.27e-05	0.0001576	3.8956	4.9054	4.604	2.1213	4.4943	3.8804	4.0551	1.8803	4.0414	4.579	2.2663	1.8929	4.5061	4.1931	5.4562	5.4619	5.6213	5.7924	5.6978	5.5414	5.5008	5.5061	5.4481	5.5434
neg_3148	3-Isopropylmalate	metab_241	C04411	HMDB0012156	157.051	neg	M-H2O-H	C7H12O5	1.03442	921-28-8	-	-	map01100;map01210;map01110;map01230;map00290	Metabolism;Metabolism;Metabolism;Metabolism;Metabolism	Global and overview maps;Global and overview maps;Global and overview maps;Global and overview maps;Amino acid metabolism	Lipids and lipid-like molecules	Fatty Acyls	Fatty acids and conjugates	1.4959	1.485	0.5868	4.265e-05	0.0002849	3.0069	3.5068	3.4905	0.4292	2.1972	4.4384	2.4221	0.4627	2.7159	3.9151	2.7676	3.9064	2.1053	4.0588	5.6248	3.7012	4.2879	4.9735	5.0537	4.9961	4.5724	4.2408	5.4677	5.0765
neg_3239	PISCIDIC ACID	metab_362	-	-	255.051	neg	M-H	C11H12O7	1.81503	-	-	-	-	-	-	-	-	-	1.4928	1.4872	0.612	9.204e-07	1.552e-05	2.0824	3.0409	2.7861	2.778	2.3893	3.3718	2.9831	2.5809	1.9329	3.3389	1.52	1.7639	3.3089	4.6629	4.6646	4.237	3.8283	4.7867	4.7836	4.5401	4.2936	4.5025	4.8355	4.5115
pos_139	13Z-Docosenamide	metab_9	-	-	338.343	pos	M+H, 2M+Na, 2M+H, M+Na	C22H43NO	9.818	-	-	-	-	-	-	-	-	-	1.4923	1.4918	1.2743	3.006e-14	3.548e-12	7.075	6.7714	6.6673	6.9057	6.7802	6.5666	6.4661	7.1554	6.9304	6.5836	6.6663	7.3294	6.9152	6.7308	5.2881	5.253	5.4199	5.5	5.3255	5.4865	5.1698	5.3291	5.3268	5.4569
pos_16467	Acetyl-L-tyrosine	metab_44	C01657	HMDB0000866	224.092	pos	M+H	C11H13NO4	3.26562	-	-	-	-	-	-	Organic acids and derivatives	Carboxylic acids and derivatives	Amino acids, peptides, and analogues	1.4858	1.4762	0.5253	9.813e-05	0.0005514	2.1244	3.3124	3.5728	3.4002	0.0076	0.0061	3.1847	0.0064	2.9734	3.3074	1.4721	3.1095	1.4815	3.1004	4.4466	3.5207	4.1984	4.3305	4.2326	4.223	4.3851	4.4192	4.0862	4.3825
pos_17956	Chondroitin D-glucuronate	metab_76	-	HMDB0060454	473.177	pos	M+ACN+Na	C16H27NO11	0.98285	-	-	-	-	-	-	Organic oxygen compounds	Organooxygen compounds	Carbohydrates and carbohydrate conjugates	1.4749	1.4796	1.6432	0.001233	0.003898	4.8749	5.4478	4.0996	4.753	4.5777	5.0738	4.7098	4.8756	4.4043	4.9254	4.5815	4.7764	4.949	5.0882	2.7358	1.5468	3.9544	4.2536	1.662	3.3829	5.0841	1.544	1.6005	3.4127
pos_18058	N-Acetylputrescine	metab_148	C02714	HMDB0002064	131.118	pos	M+H	C6H14N2O	0.7793	18233-70-0	-	-	map01100;map00330	Metabolism;Metabolism	Global and overview maps;Amino acid metabolism	Organic acids and derivatives	Carboximidic acids and derivatives	Carboximidic acids	1.4497	1.4366	0.6796	5.835e-06	5.902e-05	4.2652	2.5094	3.3041	4.0783	4.6296	2.497	2.6145	3.8807	3.8049	2.5708	4.3852	4.3067	3.4435	4.579	6.2834	4.7881	5.2913	5.9249	5.3387	5.6591	5.6415	4.4857	5.5961	4.4497
pos_7957	PS(18:1(9Z)/0:0)	metab_185	-	LMGP03050001	524.298	pos	M+H	C24H46NO9P	8.64635	-	-	-	-	-	-	-	-	-	1.4462	1.4308	0.5977	0.0009378	0.003103	3.7748	3.4024	4.134	0.4856	4.4375	4.673	0.5599	4.3893	4.9054	0.5287	6.0036	4.468	3.123	0.4697	5.3979	5.9305	5.6479	5.5665	5.897	4.9359	5.2591	4.4562	5.6374	5.4777
pos_16770	Trans-O-Methylgrandmarin	metab_207	-	HMDB0039031	307.118	pos	M+H	C16H18O6	2.98117	-	-	-	-	-	-	Phenylpropanoids and polyketides	Coumarins and derivatives	Pyranocoumarins	1.4358	1.4312	3.2345	0.002652	0.007392	0.0259	2.4793	3.3574	3.7829	3.9803	3.3381	4.958	3.2638	3.5424	3.2546	2.4687	2.3366	3.4512	2.08	0.0009	0.0004	4.8452	0.0007	1.7375	0.0007	0.752	0.0004	2.008	0.0006
pos_11038	Dihydroceramide C2	metab_89	-	-	344.316	pos	M+H	C20H41NO3	8.6558	-	-	-	-	-	-	-	-	-	1.4341	1.4361	1.6874	0.005606	0.01407	5.3178	4.6318	5.4629	4.739	4.9167	5.2021	5.2295	4.2283	4.4135	5.0414	4.6356	4.3612	4.5573	4.7626	4.4162	1.0031	1.0116	5.5001	3.0769	4.0807	4.3019	1.0005	1.0531	3.1247
pos_8073	Deoxycholic acid 3-glucuronide	metab_86	C03033	HMDB0002596;LMST05010046	607.29	pos	M+K	C30H48O10	8.80457	72504-58-6	-	-	map01100;map00040;map04976	Metabolism;Metabolism;Organismal Systems	Global and overview maps;Carbohydrate metabolism;Digestive system	Lipids and lipid-like molecules	Steroids and steroid derivatives	Steroidal glycosides	1.4175	1.3992	0.487	0.002993	0.008151	0.9574	0.0074	0.0087	0.0074	0.009	0.0072	4.7114	4.9745	0.0061	2.9584	4.2646	5.0705	1.7461	5.784	4.6354	4.9944	5.7727	4.3662	4.1113	4.3813	3.6231	4.8449	4.2186	3.795
pos_2910	Alpha-Hederin	metab_47	C08954	-	751.461	pos	M+H, M+Na	C41H66O12	6.58537	-	-	-	-	-	-	-	-	-	1.4132	1.4236	2.4185	0.01114	0.02495	2.1672	4.0042	4.4052	3.3436	4.2021	4.9568	4.4838	6.1205	3.6286	4.413	2.0542	2.9687	2.1428	5.7273	0.7744	0.5238	0.5304	0.6648	0.6098	0.6612	4.2045	0.5218	7.0072	0.6366
pos_18172	4-Pyrimidine Methanamine (hydrochloride)	metab_30	-	-	110.072	pos	M+H	C5H7N3	0.599633	-	-	-	-	-	-	-	-	-	1.3955	1.4087	0.6793	1.99e-07	4.696e-06	3.1203	2.4706	3.0453	4.084	3.1408	3.0063	2.7688	3.6124	3.0986	2.7171	3.3912	3.0379	3.1286	2.6494	4.2858	5.5428	4.7363	4.826	4.2828	4.012	4.3348	4.8671	4.4972	4.1176
neg_11	(4E,7E,10Z,13E,16E,19E)-docosa-4,7,10,13,16,19-hexaenoic acid	metab_219	-	-	327.232	neg	M-H, 2M-H, M+FA-H, M+Cl, M+K-2H	C22H32O2	8.69762	-	-	-	-	-	-	-	-	-	1.393	1.3991	1.3685	2.659e-06	3.137e-05	6.1221	5.1841	5.4743	6.9177	6.5032	5.6612	4.91	6.1127	4.6033	5.3936	6.567	6.0306	6.3062	5.7865	4.1994	4.7451	4.9929	4.2933	3.9029	3.1159	4.209	3.8189	4.5862	4.7131
neg_798	Sesaminol glucosyl-(1->2)-[glucosyl-(1->6)]-glucoside	metab_373	-	HMDB0041211	901.263	neg	M+Cl, M+FA-H	C38H48O22	3.27782	157469-83-5	-	-	-	-	-	Lignans, neolignans and related compounds	Lignan glycosides	-	1.3922	1.3673	3.7506	0.008301	0.01962	1.8908	0.285	2.5555	3.1668	0.3642	6.4716	2.9582	3.6191	4.0607	0.4552	4.0288	4.6953	3.3545	4.7494	0.005	0.0017	0.0018	0.0025	2.5378	0.0038	0.002	5.5615	0.0042	0.0037
neg_7621	Ethyl maltol	metab_287	C20362	HMDB0031735	121.031	neg	M-H2O-H	C7H8O3	12.2258	4940-11-8	-	-	-	-	-	Organoheterocyclic compounds	Pyrans	Pyranones and derivatives	1.3855	1.3863	1.3498	8.633e-05	0.0004929	5.4894	5.451	5.5561	5.4391	5.5635	5.6443	5.8466	5.4711	5.4068	5.8301	5.5139	5.3074	5.7936	5.5847	5.032	3.4189	2.6702	4.3589	4.5724	4.7852	4.2399	3.7206	4.0635	4.3542
neg_2030	Lucyobroside	metab_313	-	HMDB0031983	744.522	neg	M+Cl, M+FA-H	C39H73NO9	10.4117	189272-90-0	-	-	-	-	-	Lipids and lipid-like molecules	Sphingolipids	Glycosphingolipids	1.3799	1.3741	1.3919	0.0009262	0.003093	5.6264	5.3508	5.5446	6.066	5.4191	5.2823	6.2302	6.097	5.1714	5.9416	5.6783	5.7069	6.1331	5.9032	4.5014	4.8935	3.7773	5.0837	5.8521	4.6115	2.483	3.9228	3.2604	2.7463
neg_8950	N-Oleoyl phenylalanine	metab_348	-	LMFA08020092;HMDB0062336	474.32	neg	M+FA-H	C27H43NO3	9.34735	-	-	-	-	-	-	Organic acids and derivatives	Carboxylic acids and derivatives	Amino acids, peptides, and analogues	1.3768	1.3484	0.6419	0.0003906	0.001471	3.0427	3.4027	1.3197	4.4877	4.9313	1.3478	1.4963	4.371	4.3543	3.993	4.8683	1.0626	3.6278	3.856	5.59	4.198	5.5951	5.1792	5.6195	5.5219	5.2036	3.6785	5.5214	5.2533
pos_17952	Porphobilinogen	metab_183	C00931	HMDB0000245	227.104	pos	M+H	C10H14N2O4	0.98285	487-90-1	-	-	map01100;map01110;map00860;map01120	Metabolism;Metabolism;Metabolism;Metabolism	Global and overview maps;Global and overview maps;Metabolism of cofactors and vitamins;Global and overview maps	Organic nitrogen compounds	Organonitrogen compounds	Amines	1.3685	1.347	1.7864	0.00333	0.00893	4.0779	3.6301	3.5189	3.3701	3.2316	4.1134	3.8967	3.9597	3.8361	3.7137	3.7952	4.0571	3.8306	3.7586	2.6972	0.8247	3.4953	3.58	0.9271	0.9866	4.1286	2.6439	0.872	0.9582
neg_15442	Pseudomonine	metab_368	-	HMDB0041438	375.132	neg	M+FA-H	C16H18N4O4	0.591083	172923-94-3	-	-	-	-	-	Organic acids and derivatives	Carboxylic acids and derivatives	Amino acids, peptides, and analogues	1.3619	1.3563	0.5907	0.0001504	0.0007716	2.8493	2.0745	2.1331	3.4561	2.898	0.6601	2.9123	3.1714	2.2339	0.4988	1.9932	2.6368	2.7603	4.3206	5.0816	4.4056	2.413	5.1405	4.4343	3.6691	4.2245	4.8567	3.8655	3.7386
neg_15041	Ophthalmic acid	metab_355	-	HMDB0005765	288.119	neg	M-H	C11H19N3O6	1.3099	495-27-2	-	-	-	-	-	Organic acids and derivatives	Carboxylic acids and derivatives	Amino acids, peptides, and analogues	1.3507	1.3369	0.5714	0.0002143	0.0009852	3.3451	2.2312	2.786	4.226	3.5873	1.2439	2.6475	3.8049	0.5727	0.0118	2.155	0.8559	2.161	2.8251	4.0934	4.7115	4.4549	2.9547	4.8108	3.4917	4.1368	4.1559	3.9547	3.8011
pos_18174	D-Pipecolic acid	metab_93	-	HMDB0005960	130.087	pos	M+H	C6H11NO2	0.599633	1723-00-8	-	-	-	-	-	Organic acids and derivatives	Carboxylic acids and derivatives	Amino acids, peptides, and analogues	1.3381	1.3373	0.7937	7.686e-09	2.474e-07	4.6247	4.7567	4.5464	4.4626	4.7658	4.618	4.831	4.5662	4.5729	4.739	4.6846	4.3048	4.6225	4.4909	6.2074	6.2931	5.6379	5.7827	5.8506	5.6906	5.9009	5.5868	5.5138	5.6598
neg_15191	N-acetylaspartate	metab_339	C01042	HMDB0000812	174.041	neg	M-H	C6H9NO5	0.952817	-	-	-	map01100;map00250	Metabolism;Metabolism	Global and overview maps;Amino acid metabolism	Organic acids and derivatives	Carboxylic acids and derivatives	Amino acids, peptides, and analogues	1.3371	1.3301	0.7451	8.881e-06	7.447e-05	4.0001	2.8685	4.0035	3.9034	4.1799	3.7383	4.2728	4.1053	3.7859	3.8294	4.1955	4.3064	4.066	4.6257	5.8011	5.133	5.4535	5.0778	6.3215	4.2818	5.6468	4.995	5.7824	5.0708
pos_112	ENOXOLONE	metab_97	C02283	HMDB0011628	471.346	pos	M+H, 2M+H, 2M+Na, 2M+K	C30H46O4	7.61817	-	-	-	-	-	-	Lipids and lipid-like molecules	Prenol lipids	Triterpenoids	1.3346	1.3595	1.351	0.002531	0.007169	6.4071	6.4607	6.4145	6.1985	6.2366	6.3735	6.6849	6.0609	5.9929	6.5141	6.108	6.192	6.32	6.5219	5.4585	4.0077	4.2339	5.4863	6.0722	4.2024	3.9506	2.1451	6.479	4.7441
pos_13728	5-(14-Nonadecenyl)-1,3-benzenediol	metab_31	-	HMDB0031677	397.306	pos	M+Na	C25H42O2	5.01815	187523-39-3	-	-	-	-	-	Benzenoids	Phenols	Benzenediols	1.3307	1.3254	0.766	8.636e-06	7.447e-05	4.0701	5.1867	4.6933	3.8163	4.0188	5.4319	5.0312	3.7073	4.432	4.9373	5.0398	4.3095	5.0868	5.0967	6.1912	4.6321	5.6838	5.851	6.4202	6.5746	5.9977	6.4785	6.4387	6.2126
pos_13264	3-keto Fusidic acid	metab_25	-	HMDB0060745	572.359	pos	M+ACN+H	C31H46O7	5.60025	-	-	-	-	-	-	Lipids and lipid-like molecules	Steroids and steroid derivatives	Oxosteroids	1.3296	1.3226	1.3876	0.000908	0.003091	5.8677	5.0337	5.6343	6.1007	6.2015	5.547	5.6254	5.29	4.6883	5.1291	5.6274	5.3554	5.0067	5.2772	3.8725	2.5261	2.5355	3.8831	5.2616	4.9194	3.8071	4.3476	5.1867	2.9801
pos_3203	N-Undecanoylglycine	metab_159	-	HMDB0013286	226.18	pos	M+H-H2O, M+H	C13H25NO3	4.90802	-	-	-	-	-	-	Organic acids and derivatives	Carboxylic acids and derivatives	Amino acids, peptides, and analogues	1.3216	1.3197	0.7868	1.132e-15	4.008e-13	4.6138	4.2076	4.2389	4.3421	4.0542	4.006	4.1313	4.2991	4.066	4.2142	4.3427	4.3841	4.1619	4.1288	5.3056	5.3088	5.4489	5.4546	5.3758	5.4707	5.1143	5.4644	5.3031	5.4892
pos_7580	LysoPE(16:1(9Z)/0:0)	metab_133	-	HMDB0011504	452.278	pos	M+H	C21H42NO7P	7.70787	-	-	-	-	-	-	Lipids and lipid-like molecules	Glycerophospholipids	Glycerophosphoethanolamines	1.318	1.3073	0.6451	0.001708	0.005001	4.1544	5.026	4.7585	0.0483	2.5278	4.2821	5.5715	3.5703	4.6873	2.0883	5.542	2.7866	3.1829	0.0458	5.1232	5.6591	5.1919	5.6119	5.519	5.1522	5.4826	4.7494	5.5552	5.4072
pos_18022	1-ACETYLPIPERIDINE	metab_11	-	-	128.107	pos	M+H	C7H13NO	0.844867	-	-	-	-	-	-	-	-	-	1.3179	1.3024	0.7456	1.327e-05	9.787e-05	4.0942	4.6956	4.0664	3.4986	4.7316	4.3144	2.5872	3.6467	3.9488	3.973	4.3622	3.9563	4.5193	4.3128	6.4329	4.7529	5.0879	5.781	5.8024	5.6416	5.6848	4.4776	5.6556	5.0104
neg_1988	N-Palmitoylsphingosine	metab_352	C00195	HMDB0000790;HMDB0004949	582.506	neg	M+Cl, M+FA-H	C34H67NO3	11.5136	24696-26-2	-	-	map01100;map05140;map00600;map04933;map04920;map04071;map04722;map04931	Metabolism;Human Diseases;Metabolism;Human Diseases;Organismal Systems;Environmental Information Processing;Organismal Systems;Human Diseases	Global and overview maps;Infectious diseases: Parasitic;Lipid metabolism;Endocrine and metabolic diseases;Endocrine system;Signal transduction;Nervous system;Endocrine and metabolic diseases	Lipids and lipid-like molecules	Sphingolipids	Ceramides	1.3163	1.307	1.3024	0.0001367	0.0007225	5.785	5.5396	6.1958	6.2901	6.3085	6.3292	5.7268	5.7084	5.1089	6.2618	6.0039	5.5982	6.0362	6.0152	4.2551	4.8372	5.5418	3.7455	3.9003	5.3712	3.7929	5.294	4.9786	3.7549
pos_18084	N1,N12-Diacetylspermine	metab_145	C03413	HMDB0002172	287.245	pos	M+H	C14H30N4O2	0.72465	61345-83-3	-	-	-	-	-	Organic acids and derivatives	Carboximidic acids and derivatives	Carboximidic acids	1.3126	1.3007	0.7013	0.0001715	0.0008357	4.4009	2.0442	3.4113	3.4465	4.748	3.4826	2.1487	5.0005	3.6443	2.1827	4.6523	5.0923	5.1471	3.9689	6.3272	5.9772	5.2195	5.7427	5.1561	4.8889	5.5446	4.0597	5.8485	5.5984
pos_785	Allysine	metab_46	C04076;C01475	HMDB0059595;HMDB0001263	332.192	pos	M+H-H2O, 2M+ACN+H	C6H11NO3	0.589933	1962-83-0	-	-	map01100;map00310;map01110;map00300;map00960;map01230;map01130;map01064;map01060	Metabolism;Metabolism;Metabolism;Metabolism;Metabolism;Metabolism;Metabolism;Metabolism;Metabolism	Global and overview maps;Amino acid metabolism;Global and overview maps;Amino acid metabolism;Biosynthesis of other secondary metabolites;Global and overview maps;Global and overview maps;Chemical structure transformation maps;Chemical structure transformation maps	Organic acids and derivatives	Carboxylic acids and derivatives	Amino acids, peptides, and analogues	1.3011	1.3009	0.6937	2.65e-07	5.519e-06	3.3081	2.8982	3.0917	2.2774	2.6409	2.945	3.1096	4.1256	3.1032	2.5159	3.6531	3.173	2.8148	1.8573	4.689	4.1315	4.1641	4.261	4.2994	4.1191	4.6802	4.1415	3.8701	4.3816
neg_9530	3beta-3-Hydroxy-11-oxolanosta-8,24-dien-26-al	metab_237	-	HMDB0035406	499.34	neg	M+FA-H	C30H46O3	8.64862	126313-85-7	-	-	-	-	-	Lipids and lipid-like molecules	Prenol lipids	Triterpenoids	1.29	1.2737	1.6179	0.01483	0.03201	5.2003	5.9603	5.7083	5.18	5.2191	4.0666	7.231	3.3552	3.2259	5.2616	3.4742	5.478	5.3512	4.7116	5.3877	6.0404	4.9723	1.1895	1.5224	1.3604	3.4817	3.9336	1.4029	1.3574
pos_2252	Cer(d16:1(4E)/22:0(2OH))	metab_73	-	LMSP02010085	610.576	pos	M+H, M+Na	C38H75NO4	12.1452	-	-	-	-	-	-	-	-	-	1.2658	1.2429	2.5526	0.02157	0.04307	4.7271	3.3012	0.3588	3.965	4.1395	4.198	1.725	2.7231	0.2803	2.9417	4.8867	4.0006	4.2684	3.6857	3.5868	0.0089	3.5772	0.0137	0.0117	0.0136	0.0109	5.4031	0.0101	0.0127
neg_8095	Ceramide (d18:1/9Z-18:1)	metab_267	C00195	HMDB0004948	608.521	neg	M+FA-H	C36H69NO3	11.4942	-	-	-	map01100;map05140;map00600;map04933;map04920;map04071;map04722;map04931	Metabolism;Human Diseases;Metabolism;Human Diseases;Organismal Systems;Environmental Information Processing;Organismal Systems;Human Diseases	Global and overview maps;Infectious diseases: Parasitic;Lipid metabolism;Endocrine and metabolic diseases;Endocrine system;Signal transduction;Nervous system;Endocrine and metabolic diseases	Lipids and lipid-like molecules	Sphingolipids	Ceramides	1.2627	1.251	1.3171	0.0004133	0.00154	5.3075	4.9305	5.938	6.0401	5.9713	5.6066	5.5377	5.5622	4.8839	5.5983	5.7702	5.0705	5.7961	5.0862	5.5203	3.1109	3.8565	2.9806	4.0096	4.5057	3.9969	4.9769	4.8843	3.9693
pos_3939	Ne,Ne dimethyllysine	metab_151	C05545	HMDB0013287	216.159	pos	M+H-2H2O, M+ACN+H	C8H18N2O2	2.23845	-	-	-	map00310	Metabolism	Amino acid metabolism	Organic acids and derivatives	Carboxylic acids and derivatives	Amino acids, peptides, and analogues	1.2604	1.2597	1.5763	0.006195	0.01534	4.0664	5.4885	4.3284	3.1317	4.5225	4.3999	5.2081	3.9962	4.1957	5.1776	4.1279	4.7049	4.6188	3.7567	4.1461	3.678	0.0011	2.6333	3.8642	5.0123	1.7586	2.4842	2.1018	2.2933
neg_5959	Deoxycholic acid	metab_279	C04483	HMDB0000626;LMST04010040	391.283	neg	M-H	C24H40O4	7.0235	83-44-3	Steroids	24-Carbon atoms	map04976;map00121	Organismal Systems;Metabolism	Digestive system;Lipid metabolism	Lipids and lipid-like molecules	Steroids and steroid derivatives	Bile acids, alcohols and derivatives	1.259	1.2803	1.2817	0.004208	0.01087	6.9898	7.1011	7.0839	6.5568	7.0947	7.1239	7.1635	7.0277	6.7165	7.3225	7.1308	6.7002	7.295	6.2194	5.6662	2.9788	4.7054	5.2308	6.5529	6.0611	5.0267	4.2014	6.8192	7.1078
neg_3467	2-Isopropylmalic acid	metab_233	C02504	HMDB0000402	175.062	neg	M-H	C7H12O5	2.41418	3237-44-3	-	-	map01100;map01110;map00290;map01210;map01230;map00620	Metabolism;Metabolism;Metabolism;Metabolism;Metabolism;Metabolism	Global and overview maps;Global and overview maps;Amino acid metabolism;Global and overview maps;Global and overview maps;Carbohydrate metabolism	Lipids and lipid-like molecules	Fatty Acyls	Fatty acids and conjugates	1.2566	1.2409	0.7536	8.578e-06	7.447e-05	4.7658	4.0195	4.2822	3.2034	4.4995	3.8199	3.7469	2.877	3.4575	4.6641	2.9097	4.0568	4.5553	5.2267	5.3572	5.1477	5.3049	4.9494	5.7256	5.4255	5.4974	4.6311	5.2914	5.8274
neg_15000	Methyl 7-epi-12-hydroxyjasmonate glucoside	metab_332	-	HMDB0031763	437.162	neg	M+Cl	C19H30O9	1.61055	142465-56-3	-	-	-	-	-	Lipids and lipid-like molecules	Fatty Acyls	Fatty acyl glycosides	1.2512	1.2627	1.8856	0.03189	0.06004	3.8933	3.7003	3.1894	3.4228	3.8973	4.8548	4.338	4.2082	4.2547	4.18	4.3511	3.688	4.2833	4.2864	0.6065	0.3	0.3228	4.8101	0.6366	0.5135	4.6327	0.3128	2.8027	6.4858
neg_4114	Tyrosyl-Hydroxyproline	metab_388	-	HMDB0029106	275.102	neg	M-H2O-H	C14H18N2O5	3.65032	-	-	-	-	-	-	Organic acids and derivatives	Carboxylic acids and derivatives	Amino acids, peptides, and analogues	1.2385	1.2453	0.5772	0.001677	0.005001	2.9111	0.2672	0.3592	2.9602	3.7259	4.0833	0.472	3.2914	0.2069	3.26	0.7398	3.0991	2.7645	5.0487	4.1741	5.1396	4.3585	3.6942	4.702	3.8894	3.7966	3.4363	3.9489	3.9433
pos_7091	3b,12a-Dihydroxy-5a-cholanoic acid	metab_20	-	HMDB0000348	785.587	pos	2M+H	C24H40O4	6.22078	2569-04-2	-	-	-	-	-	Lipids and lipid-like molecules	Steroids and steroid derivatives	Bile acids, alcohols and derivatives	1.2343	1.2421	1.4473	0.02187	0.04321	5.6807	6.5046	5.5972	5.3732	5.9513	6.1959	5.6229	6.2024	5.5662	6.0998	6.6231	5.2155	6.151	3.4337	5.4739	0.7105	0.7181	4.9566	4.9418	6.4107	2.4837	3.8705	4.9311	5.0902
pos_457	4,8 dimethylnonanoyl carnitine	metab_27	-	LMFA07070046;HMDB0006202	330.264	pos	M+H, M+K, 2M+H	C18H35NO4	8.05568	-	-	-	-	-	-	Lipids and lipid-like molecules	Fatty Acyls	Fatty acid esters	1.218	1.2353	1.3126	0.001193	0.003805	6.2963	5.128	5.7139	5.8095	5.672	5.6828	5.3198	5.3521	5.6148	5.3913	5.6334	5.2211	5.6333	5.378	3.6216	3.8771	4.5853	5.0716	4.4037	4.5595	4.8169	2.0197	5.1409	4.2612
pos_4864	Minocycline	metab_141	C07225	LMPK07000002;HMDB0015152	440.186	pos	M+H-H2O	C23H27N3O7	3.02248	10118-90-8	-	-	-	-	-	Phenylpropanoids and polyketides	Tetracyclines	-	1.216	1.1967	1.4497	0.001899	0.00551	4.2135	3.514	4.1377	4.0227	4.5328	4.2021	4.4359	4.3226	4.0515	4.4293	4.2489	3.8701	4.3821	3.5877	3.85	4.7235	2.0952	3.11	2.972	1.4446	3.0018	2.7345	2.7232	1.8975
neg_1738	Ginkgoic acid	metab_297	C10794	HMDB0033897	345.242	neg	M-H, 2M-H	C22H34O3	9.59107	22910-60-7	-	-	-	-	-	Benzenoids	Benzene and substituted derivatives	Benzoic acids and derivatives	1.2094	1.2267	1.4246	0.01442	0.03132	5.0067	4.8867	5.0423	5.0099	5.3608	5.5046	4.9774	6.9613	5.6481	6.2828	5.9792	6.6504	5.755	5.059	3.35	1.9459	2.3495	5.329	5.457	3.4011	4.3918	1.6525	4.2341	7.0634
pos_543	22,23-Dihydroergosterol	metab_13	-	HMDB0030139	399.362	pos	M+H, 2M+H, M+ACN+Na	C28H46O	10.6753	516-79-0	-	-	-	-	-	Lipids and lipid-like molecules	Steroids and steroid derivatives	Cholestane steroids	1.2077	1.1893	1.2712	4.806e-06	5.37e-05	5.5179	4.5506	6.2355	5.2843	5.5428	5.5232	5.0336	5.1471	4.4885	5.9232	5.4541	5.8295	6.1676	5.5551	4.7417	3.872	4.5817	4.2867	3.9421	4.5241	4.255	4.9217	4.1562	3.5712
neg_3115	3-Hydroxypicolinic acid	metab_239	C18620	HMDB0013188	138.021	neg	M-H	C6H5NO3	0.9739	874-24-8	-	-	-	-	-	Organoheterocyclic compounds	Pyridines and derivatives	Pyridinecarboxylic acids and derivatives	1.2022	1.1888	0.7379	4.696e-05	0.0003023	3.7228	3.4845	1.8409	3.0916	3.4216	3.7617	2.0226	4.103	4.2999	3.1743	3.8089	4.2423	4.4406	4.3216	4.7043	4.6958	5.0511	4.7985	4.9597	4.8075	4.7928	4.5476	4.5096	5.2857
pos_17850	6-Maleimidocaproic acid	metab_37	-	-	212.092	pos	M+H	C10H13NO4	1.58827	-	-	-	-	-	-	-	-	-	1.1986	1.2131	0.7445	9.256e-06	7.447e-05	3.4725	3.7127	3.3085	3.4367	2.4682	4.0899	3.4301	4.2679	3.5669	4.0332	2.3443	4.0676	3.876	3.7409	4.7239	4.0673	4.576	5.5288	4.9425	4.7105	5.5917	4.552	4.5178	4.5829
pos_8149	LysoPC(22:2(13Z,16Z))	metab_131	C04230	HMDB0010400	576.401	pos	M+H	C30H58NO7P	9.01587	-	Lipids	Phospholipids	map00564;map05231	Metabolism;Human Diseases	Lipid metabolism;Cancers: Overview	Lipids and lipid-like molecules	Glycerophospholipids	Glycerophosphocholines	1.1956	1.2214	0.7293	0.0002903	0.001209	4.2141	4.6187	3.4283	5.6892	3.8386	2.9166	4.1035	4.0736	3.857	3.7259	3.8551	4.2495	3.8807	1.6253	4.1119	6.1178	5.881	5.0019	5.1765	5.4126	4.9118	6.6133	4.7734	4.9696
pos_16303	(-)-trans-Carveol glucoside	metab_0	-	HMDB0029848	359.141	pos	M+2Na-H	C16H26O6	3.39457	113349-30-7	-	-	-	-	-	Lipids and lipid-like molecules	Prenol lipids	Terpene glycosides	1.1848	1.1867	0.7091	4.965e-05	0.0003091	3.6453	2.1948	3.6022	3.6025	2.6375	3.3167	2.8365	3.8162	1.4125	2.5279	3.5681	4.5117	2.4398	3.612	5.1951	4.0896	4.3414	4.694	3.935	4.1688	4.0627	4.582	4.3338	4.6399
neg_2010	Cerebroside B	metab_268	-	HMDB0035990	772.553	neg	M+Cl, M+FA-H	C41H77NO9	10.894	88642-46-0	-	-	-	-	-	Lipids and lipid-like molecules	Sphingolipids	Glycosphingolipids	1.1795	1.178	1.2993	0.0004986	0.00182	5.2071	4.8032	5.3309	5.2494	5.3	6.3419	6.3476	6.4754	4.5644	6.1987	5.4585	5.2291	6.0097	5.2063	2.9608	3.8193	4.2236	3.8294	4.8341	5.2029	4.2929	4.0186	3.8799	5.6716
pos_423	Bassic acid	metab_56	-	HMDB0034526;LMPR0106150025	487.341	pos	M+H, M+CH3OH+H, 2M+H	C30H46O5	6.49373	465-01-0	-	-	-	-	-	Lipids and lipid-like molecules	Steroids and steroid derivatives	Hydroxysteroids	1.172	1.1741	1.2163	7.985e-05	0.0004634	6.3961	6.2131	6.1484	5.851	6.2421	6.1067	6.4129	5.6361	6.0473	6.1403	5.8386	5.9727	5.9473	5.6667	4.7364	4.1745	5.3977	5.7933	5.5477	5.2092	4.7125	4.2531	5.1189	4.7434
neg_2779	Methyl 2,3-dihydro-3,5-dihydroxy-2-oxo-3-indoleacetic acid	metab_331	-	HMDB0038942	282.062	neg	M-H, M+FA-H	C11H11NO5	2.49775	57061-18-4	-	-	-	-	-	Organoheterocyclic compounds	Indoles and derivatives	Indolyl carboxylic acids and derivatives	1.1711	1.152	0.6352	0.00105	0.003378	1.6227	1.5747	1.7507	1.51	1.7224	1.7797	4.3336	2.3758	3.014	1.9231	2.8814	1.4824	3.916	4.0539	3.8271	2.1963	4.7505	4.4508	4.0276	4.5703	4.2933	3.4278	3.2209	3.3979
neg_3619	RHOIFOLIN	metab_371	C12627	HMDB0038848	577.153	neg	M-H	C27H30O14	2.67285	17306-46-6	-	-	map00944	Metabolism	Biosynthesis of other secondary metabolites	-	-	-	1.1698	1.1288	1.8318	0.04128	0.07456	3.6543	2.2785	2.446	2.7896	2.9406	4.0518	3.509	3.5956	4.9031	3.5409	4.0616	4.3914	4.2686	4.6504	0.5204	0.2449	1.8706	2.9533	3.6705	0.4349	2.2793	7.0537	0.4634	0.4328
pos_1453	(1xi,3S)-1,2,3,4-Tetrahydro-1-methyl-beta-carboline-1,3-dicarboxylic acid	metab_2	-	HMDB0035115	275.103	pos	M+H-H2O, M+H	C14H14N2O4	4.32502	-	-	-	-	-	-	Alkaloids and derivatives	Harmala alkaloids	-	1.1678	1.1526	1.8971	0.04859	0.08586	3.2766	4.0792	3.1564	3.6462	4.4578	3.5176	3.2629	3.0577	3.4586	4.209	3.8138	4.6746	3.5538	2.9397	0.131	1.8911	4.7502	5.5538	0.0282	0.4789	5.4638	0.0215	0.0245	0.8944
neg_1473	Gingerglycolipid B	metab_295	-	HMDB0041094	723.378	neg	M+Cl, M+FA-H	C33H58O14	7.81582	88168-90-5	-	-	-	-	-	Lipids and lipid-like molecules	Glycerolipids	Glycosylglycerols	1.1664	1.1743	0.7592	0.0003441	0.001369	5.4306	2.9511	3.1309	5.9769	4.5029	3.1603	3.3146	4.4402	4.3561	3.5157	4.773	4.7126	4.3367	5.1692	6.2118	5.031	6.2467	5.0538	5.2963	5.94	4.9149	6.7875	5.4023	5.3494
pos_18106	1,4-Methylimidazoleacetic acid	metab_6	-	-	141.066	pos	M+H	C6H8N2O2	0.6817	-	-	-	-	-	-	-	-	-	1.1659	1.1461	0.7705	0.0002406	0.001043	4.3925	4.5941	4.0378	4.5329	4.478	3.9446	5.2272	2.8377	4.7231	4.6391	4.8705	2.0134	4.7587	5.0697	5.4939	5.2208	5.6529	6.3979	5.7931	5.8069	6.1351	4.3966	5.3416	5.4864
neg_638	(1RS,2RS)-Guaiacylglycerol 1-glucoside	metab_215	-	HMDB0033300	421.138	neg	M+Cl, M+FA-H	C16H24O10	2.39452	-	-	-	-	-	-	Organic oxygen compounds	Organooxygen compounds	Carbohydrates and carbohydrate conjugates	1.1645	1.1443	1.2732	7.342e-05	0.0004405	5.1942	5.4048	5.5143	5.0721	5.367	5.2512	5.5026	4.7061	5.0372	5.6692	3.9793	4.8221	5.6933	5.7211	3.8978	4.9013	3.8569	5.0182	3.6213	3.8345	3.8984	4.6659	3.4206	3.8076
neg_37	Cholic acid	metab_269	C00695	LMST04010001;HMDB0000619	815.565	neg	M+Cl, 2M-H, M+FA-H, M-H	C24H40O5	6.03452	81-25-4	Steroids	24-Carbon atoms	map01100;map04976;map00121;map00120	Metabolism;Organismal Systems;Metabolism;Metabolism	Global and overview maps;Digestive system;Lipid metabolism;Lipid metabolism	Lipids and lipid-like molecules	Steroids and steroid derivatives	Bile acids, alcohols and derivatives	1.1584	1.1763	1.248	0.007184	0.01747	7.8202	6.954	6.2456	7.9547	7.8498	6.8092	6.5143	7.6531	6.8634	6.9758	7.4781	7.789	6.5662	7.7625	7.4712	4.3819	4.3403	5.8184	7.0285	7.4318	4.4441	4.4257	6.1774	6.4157
neg_2	L-Tryptophan	metab_311	C00078	HMDB0000929	203.083	neg	M-H, M+Na-2H, M+FA-H, 2M-H, 2M+FA-H	C11H12N2O2	2.21048	73-22-3	Peptides	Amino acids	map01100;map04978;map01110;map01230;map00970;map01210;map01070;map00901;map00966;map04974;map05143;map01061;map00260;map04726;map01130;map00400;map05230;map01063;map00380;map00404;map01060	Metabolism;Organismal Systems;Metabolism;Metabolism;Genetic Information Processing;Metabolism;Metabolism;Metabolism;Metabolism;Organismal Systems;Human Diseases;Metabolism;Metabolism;Organismal Systems;Metabolism;Metabolism;Human Diseases;Metabolism;Metabolism;Metabolism;Metabolism	Global and overview maps;Digestive system;Global and overview maps;Global and overview maps;Translation;Global and overview maps;Chemical structure transformation maps;Biosynthesis of other secondary metabolites;Biosynthesis of other secondary metabolites;Digestive system;Infectious diseases: Parasitic;Chemical structure transformation maps;Amino acid metabolism;Nervous system;Global and overview…	Organoheterocyclic compounds	Indoles and derivatives	Indolyl carboxylic acids and derivatives	1.1345	1.1219	1.1994	7.473e-05	0.0004409	5.8999	5.7936	6.0055	6.0347	6.2817	6.2859	5.9803	5.6353	5.7126	6.2606	5.7666	5.7243	6.3454	5.7462	4.4308	4.662	5.171	5.6785	5.7465	4.5323	5.2925	4.8795	4.958	4.3616
neg_15434	L-Histidine	metab_308	C00135	HMDB0000177	154.063	neg	M-H	C6H9N3O2	0.60065	71-00-1	Peptides	Amino acids	map01100;map01110;map05230;map00340;map02010;map01230;map04974;map00970;map01065;map00410;map01060	Metabolism;Metabolism;Human Diseases;Metabolism;Environmental Information Processing;Metabolism;Organismal Systems;Genetic Information Processing;Metabolism;Metabolism;Metabolism	Global and overview maps;Global and overview maps;Cancers: Overview;Amino acid metabolism;Membrane transport;Global and overview maps;Digestive system;Translation;Chemical structure transformation maps;Metabolism of other amino acids;Chemical structure transformation maps	Organic acids and derivatives	Carboxylic acids and derivatives	Amino acids, peptides, and analogues	1.1286	1.1438	0.7841	1.196e-05	9.005e-05	4.0268	3.3068	4.0537	4.9802	4.0215	4.3079	3.286	4.2487	3.9789	3.8297	4.6502	3.8443	4.5378	3.0948	4.8524	6.0858	5.2289	5.2673	4.9953	4.6686	4.6994	5.2979	5.3025	4.768
neg_3255	Dopaquinone	metab_284	C00822	HMDB0001229;HMDB0039119	240.051	neg	M+FA-H	C9H9NO4	2.01333	4430-97-1	-	-	map01100;map00965;map00350	Metabolism;Metabolism;Metabolism	Global and overview maps;Biosynthesis of other secondary metabolites;Amino acid metabolism	Organic acids and derivatives	Carboxylic acids and derivatives	Amino acids, peptides, and analogues	1.1283	1.1192	0.7835	3.089e-05	0.0002103	4.0048	4.1053	3.7282	2.7843	3.0105	4.7131	4.5332	4.0005	3.0775	4.4161	4.6611	3.6517	4.9442	4.4886	5.1972	4.8603	4.884	5.7194	5.1948	5.3282	5.1195	4.842	5.0947	4.9297
neg_14186	M-Coumaric acid	metab_330	C12621	HMDB0001713	163.041	neg	M-H	C9H8O3	2.87028	588-30-7	-	-	map01220;map00360;map01120	Metabolism;Metabolism;Metabolism	Global and overview maps;Amino acid metabolism;Global and overview maps	Phenylpropanoids and polyketides	Cinnamic acids and derivatives	Hydroxycinnamic acids and derivatives	1.125	1.1296	1.2862	0.0004969	0.00182	5.4169	4.8872	5.2647	4.3434	5.8923	4.9157	5.2539	5.2415	6.209	5.4622	5.6046	4.372	5.581	4.8407	4.9758	4.452	2.7772	3.4368	5.0534	4.0955	4.2322	3.667	4.4523	3.5569
neg_9287	LysoPC(18:0)	metab_317	C04230	HMDB0013122;HMDB0010384;HMDB0011128	568.358	neg	M+FA-H	C26H54NO7P	8.91463	-	Lipids	Phospholipids	map00564;map05231	Metabolism;Human Diseases	Lipid metabolism;Cancers: Overview	Lipids and lipid-like molecules	Glycerophospholipids	Glycerophosphocholines	1.1247	1.114	0.8537	1.141e-06	1.659e-05	5.5191	6.3474	5.6298	5.7359	5.8843	6.2335	5.0924	6.1149	6.2609	5.0596	6.1113	5.4253	5.7606	5.4364	6.7422	7.2974	7.0823	6.1717	6.6746	6.7637	6.5187	6.7045	6.8957	6.6027
neg_15013	5-(3-Pyridyl)-2-hydroxytetrahydrofuran	metab_247	C19578	HMDB0062407	210.077	neg	M+FA-H	C9H11NO2	1.49623	53798-73-5	-	-	map05204;map00980	Human Diseases;Metabolism	Cancers: Overview;Xenobiotics biodegradation and metabolism	Organoheterocyclic compounds	Pyridines and derivatives	-	1.1207	1.1314	0.6912	0.0006231	0.002206	1.6359	3.0988	3.416	1.523	1.7356	4.3078	3.3054	2.8541	1.8621	4.2468	2.7495	2.8296	2.9142	3.6295	4.1266	3.2441	4.0329	5.1795	4.5145	3.7977	5.297	3.638	3.8588	3.7609
pos_17785	Alpha-L-Rhamnopyranosyl-(1->3)-alpha-D-galactopyranosyl-(1->3)-L-fucose	metab_48	-	HMDB0039741	536.196	pos	M+ACN+Na	C18H32O14	2.09963	71144-75-7	-	-	-	-	-	Organooxygen compounds	Carbohydrates and carbohydrate conjugates	Glycosyl compounds	1.114	1.1067	1.4556	0.01888	0.03909	4.1997	4.1352	4.1424	4.1751	4.212	4.6009	4.5505	4.4066	4.1001	4.3934	4.1483	4.2518	4.4666	4.0611	2.1634	1.8416	4.958	5.4367	1.9583	4.7458	2.5372	1.8388	1.896	1.993
pos_228	N-Benzoylaspartic acid	metab_150	-	HMDB0034251	279.098	pos	M+ACN+H, M+ACN+Na, M+H-H2O	C11H11NO5	2.50265	4631-12-3	-	-	-	-	-	Organic acids and derivatives	Carboxylic acids and derivatives	Amino acids, peptides, and analogues	1.1108	1.0815	0.666	0.0009252	0.003093	2.1417	2.0691	2.1377	2.0682	2.1521	2.0568	2.1737	2.0789	1.9878	2.1302	2.0287	2.0916	2.3174	4.551	3.1351	2.5652	4.6579	4.1676	3.7568	3.0578	4.0001	2.4226	2.8913	3.6595
pos_754	L-Glutamate	metab_120	C00025;C00217;C00302	HMDB0060475;HMDB0003339;HMDB0000148	148.061	pos	M+H, 2M+H, M+H-H2O	C5H9NO4	0.844867	-	Peptides;Hormones and transmitters;Peptides;-	Amino acids;Neurotransmitters;Amino acids;-	map01110;map01200;map00330;map00480;map00332;map04742;map00250;map05033;map04974;map04072;map04216;map00630;map00430;map04964;map00471;map02010;map00860;map04080;map05016;map05014;map04727;map01064;map04723;map05031;map04721;map01060;map01100;map00220;map04540;map01120;map01210;map00340;map00524;map01230;map04068;map05034;map00660;map04724;map00460;map05030;map00650;map00910;map02020;map04713;map…	Metabolism;Metabolism;Metabolism;Metabolism;Metabolism;Organismal Systems;Metabolism;Human Diseases;Organismal Systems;Environmental Information Processing;Cellular Processes;Metabolism;Metabolism;Organismal Systems;Metabolism;Environmental Information Processing;Metabolism;Environmental Information Processing;Human Diseases;Human Diseases;Organismal Systems;Metabolism;Organismal Systems;Human Di…	Global and overview maps;Global and overview maps;Amino acid metabolism;Metabolism of other amino acids;Biosynthesis of other secondary metabolites;Sensory system;Amino acid metabolism;Substance dependence;Digestive system;Signal transduction;Cell growth and death;Carbohydrate metabolism;Metabolism of other amino acids;Excretory system;Metabolism of other amino acids;Membrane transport;Metabolism…	Organic acids and derivatives	Carboxylic acids and derivatives	Amino acids, peptides, and analogues	1.1011	1.1078	0.8428	5.694e-08	1.551e-06	4.517	4.7804	4.424	4.6607	4.6122	4.6472	4.8163	4.5172	4.5661	4.8668	4.3733	4.5505	4.8188	4.3364	5.7199	5.692	5.1747	5.2643	5.3637	5.6329	5.8382	5.3006	5.2105	5.4521
neg_14583	Caffeic Acid	metab_266	C01197;C01481	HMDB0001964	179.035	neg	M-H	C9H8O4	2.4644	331-39-5	-	-	map01100;map01220;map00940;map01110;map01061	Metabolism;Metabolism;Metabolism;Metabolism;Metabolism	Global and overview maps;Global and overview maps;Biosynthesis of other secondary metabolites;Global and overview maps;Chemical structure transformation maps	Phenylpropanoids and polyketides	Cinnamic acids and derivatives	Hydroxycinnamic acids and derivatives	1.0972	1.0606	0.6907	0.007526	0.01812	4.496	2.9454	3.8647	0.2083	4.1339	0.3348	3.6136	4.0323	4.1461	0.3861	4.0068	4.604	4.6005	4.0357	4.8326	4.0176	4.2491	4.0348	5.7674	4.9526	4.1866	4.7692	5.6083	4.5309
pos_694	Glycocholic Acid	metab_106	C01921	HMDB0000138;HMDB0000331;LMST05030001	466.316	pos	M+H, M+Na, 2M+H	C26H43NO6	5.42103	475-31-0	Steroids	24-Carbon atoms	map01100;map04976;map00121;map00120	Metabolism;Organismal Systems;Metabolism;Metabolism	Global and overview maps;Digestive system;Lipid metabolism;Lipid metabolism	Lipids and lipid-like molecules	Steroids and steroid derivatives	Bile acids, alcohols and derivatives	1.0924	1.0676	1.2256	0.002898	0.007953	5.9527	5.5907	5.5989	6.3572	6.0257	5.8383	5.9783	5.4548	6.4407	5.7122	5.4299	5.8157	5.3586	5.9076	5.3109	5.2069	3.2017	4.039	4.8483	4.576	4.6616	6.426	4.399	4.8076
neg_15002	2-(1-Ethoxyethoxy)propanoic acid	metab_227	-	HMDB0059918	161.082	neg	M-H	C7H14O4	1.58942	-	-	-	-	-	-	Organic acids and derivatives	Carboxylic acids and derivatives	Carboxylic acids	1.0759	1.0684	0.7719	0.0002415	0.001043	2.123	3.6064	3.2669	3.1503	2.9837	4.1459	4.0873	2.9565	3.8355	4.2922	4.0546	4.2658	4.4284	4.1908	4.4146	4.2559	4.3124	4.7965	5.7463	5.0351	5.2047	4.0512	5.1953	4.5462
pos_15655	Flazine	metab_101	-	HMDB0033459	309.087	pos	M+H	C17H12N2O4	3.821	100041-05-2	-	-	-	-	-	Alkaloids and derivatives	Harmala alkaloids	-	1.0756	1.0756	1.3237	0.004359	0.01114	4.7198	5.5784	5.4643	4.5424	4.0819	5.6479	4.9536	5.572	3.5227	5.1058	4.6264	4.6552	4.726	4.4647	3.3915	1.7788	2.2432	4.9389	3.7213	4.0857	4.4602	3.9123	3.7104	4.2684
pos_2492	L-a-Lysophosphatidylserine	metab_118	-	-	526.314	pos	M+H, M+Na	C24H48NO9P	9.23597	-	-	-	-	-	-	-	-	-	1.0749	1.0893	1.2516	0.00016	0.000809	5.3455	4.874	5.3529	5.3691	5.5185	4.9969	4.3261	6.0525	4.6748	4.3601	5.687	5.6491	4.9623	5.4669	4.4946	5.1371	4.5269	3.789	3.5336	4.0152	3.9742	4.3542	3.233	4.3963
neg_11580	13(S)-HpODE	metab_225	C04717	HMDB0003871	311.222	neg	M-H	C18H32O4	5.74355	-	-	-	map01100;map00591	Metabolism;Metabolism	Global and overview maps;Lipid metabolism	Lipids and lipid-like molecules	Fatty Acyls	Lineolic acids and derivatives	1.0677	1.0669	0.8106	4.989e-05	0.0003091	4.7727	3.9107	5.3823	4.7321	3.3005	4.7034	3.5769	4.3874	5.4704	4.6187	3.5285	4.7598	4.2398	4.6496	5.6235	5.0381	5.4638	5.359	5.5043	5.5334	5.113	5.2151	6.0483	5.7639
pos_146	Gingerglycolipid A	metab_103	-	HMDB0041093	699.355	pos	M+H-H2O, M+K, M+Na, M+H	C33H56O14	7.18203	145937-22-0	-	-	-	-	-	Lipids and lipid-like molecules	Glycerolipids	Glycosylglycerols	1.0665	1.049	0.7608	0.001046	0.003378	2.7186	4.0858	3.2858	2.8733	4.4706	3.423	4.0594	5.1408	2.9066	3.3362	4.2717	2.8502	2.7997	3.8276	4.4632	4.523	4.7382	3.5589	4.7244	6.2078	4.1048	5.142	4.7063	4.8248
neg_2943	Gallic acid	metab_289	C01424	HMDB0005807	169.015	neg	M-H, 2M-H	C7H6O5	1.17822	149-91-7	-	-	map00627;map01120;map01061	Metabolism;Metabolism;Metabolism	Xenobiotics biodegradation and metabolism;Global and overview maps;Chemical structure transformation maps	Benzenoids	Benzene and substituted derivatives	Benzoic acids and derivatives	1.0616	1.0533	0.7776	0.009816	0.02256	4.368	3.8981	4.3735	3.3103	3.409	4.5756	4.1975	4.943	4.0973	4.5962	6.2406	4.2245	4.7019	4.024	4.7802	4.4772	7.0933	5.9569	4.9573	3.9822	5.2242	6.5492	5.3965	7.5738
pos_17164	4-Hydroxynornantenine	metab_28	-	HMDB0033366	324.124	pos	M+H-H2O	C19H19NO5	2.57823	69128-21-8	-	-	-	-	-	Alkaloids and derivatives	Aporphines	-	1.0591	1.0607	1.3577	0.008404	0.0197	4.6994	3.9462	3.8697	4.4562	4.9208	4.4778	4.3711	4.4941	4.4475	4.264	4.5501	4.3372	5.0364	6.3205	2.6584	3.3424	2.3202	2.7512	3.8224	2.2933	3.1805	5.1917	5.4208	2.7883
pos_11873	LysoSM(d18:1)	metab_138	C03640	HMDB0006482	529.361	pos	M+ACN+Na	C23H50N2O5P+	7.53823	1670-26-4	-	-	map00600	Metabolism	Lipid metabolism	Lipids and lipid-like molecules	Sphingolipids	Phosphosphingolipids	1.0512	1.0646	1.3488	0.02104	0.04255	5.3213	5.2332	5.041	4.5525	5.1139	5.1842	5.2261	5.2092	4.8853	5.0794	4.7169	4.8648	5.0275	3.6755	5.1103	3.545	1.3573	4.5841	5.3224	3.5641	3.3131	1.3456	5.0686	3.3953
pos_869	2-Hydroxycinnamic acid	metab_17	C01772	HMDB0134028;HMDB0062655;HMDB0002641	165.055	pos	M+H-H2O, M+H	C9H8O3	0.992867	583-17-5	-	-	map01110;map00940;map00360;map01120	Metabolism;Metabolism;Metabolism;Metabolism	Global and overview maps;Biosynthesis of other secondary metabolites;Amino acid metabolism;Global and overview maps	Phenylpropanoids and polyketides	Cinnamic acids and derivatives	Hydroxycinnamic acids and derivatives	1.0467	1.047	0.8581	5.43e-06	5.653e-05	5.1167	5.0036	4.3898	5.2731	5.075	4.8397	5.1302	5.0288	5.0405	4.9867	5.0734	4.8151	4.9604	4.9229	5.9095	6.5259	5.8233	6.0352	5.5518	5.7027	5.4979	5.5174	5.9258	5.4908
neg_9753	Gingerglycolipid C	metab_296	-	HMDB0041095	725.393	neg	M+FA-H	C33H60O14	8.3383	35949-86-1	-	-	-	-	-	Lipids and lipid-like molecules	Glycerolipids	Glycosylglycerols	1.0186	1.0164	0.7451	0.007204	0.01747	4.7902	3.8228	1.6469	5.2311	4.7274	4.5539	1.8273	4.6119	1.3337	1.765	4.8666	4.9431	5.2246	4.9173	5.5782	4.5096	5.7717	4.8308	5.362	5.3973	4.7854	6.06	5.0556	4.666
neg_15019	Valyl-Proline	metab_392	-	HMDB0029135	213.124	neg	M-H	C10H18N2O3	1.4094	-	-	-	-	-	-	Organic acids and derivatives	Carboxylic acids and derivatives	Amino acids, peptides, and analogues	1.0157	0.9971	0.8047	0.0002176	0.0009877	4.5335	3.6865	3.8557	2.5304	4.2909	4.3975	3.5436	4.5494	4.2475	2.3913	4.7043	4.3254	4.2738	4.2128	5.2152	4.7366	4.7712	5.1946	5.1058	4.9398	4.6956	4.7313	4.8762	5.0302
pos_2215	Beta-Sitostenone	metab_60	-	LMST01040249;HMDB0033934	413.378	pos	M+H, 2M+H	C29H48O	10.8556	1058-61-3	-	-	-	-	-	Lipids and lipid-like molecules	Steroids and steroid derivatives	Stigmastanes and derivatives	1.0147	0.9949	1.1896	0.0002295	0.001028	6.0181	5.002	6.5926	5.9064	6.0745	6.1408	5.534	5.7451	4.5246	6.3714	5.9633	6.4724	6.6847	6.1427	5.2683	4.3396	5.3905	5.0798	4.9211	5.2664	4.9258	5.7429	4.6943	4.3093
neg_2775	Hydroxyprolyl-Isoleucine	metab_304	-	HMDB0028866	265.119	neg	M+Na-2H, M+K-2H	C11H20N2O4	2.52997	-	-	-	-	-	-	Organic acids and derivatives	Carboxylic acids and derivatives	Amino acids, peptides, and analogues	1.0057	1.0315	0.7521	0.005683	0.01417	3.431	4.2481	4.131	4.3458	5.117	4.6962	4.7618	3.2722	3.6625	4.6832	0.2703	2.8708	5.1087	4.4428	5.8149	5.712	6.2091	4.3283	3.4133	5.4264	5.3791	5.2179	5.7063	5.0724
pos_2499	PG(18:1(9Z)/0:0)	metab_176	-	LMGP04050006	511.303	pos	M+H-H2O, M+H	C24H47O9P	9.04498	-	-	-	-	-	-	-	-	-	1.0027	0.9937	0.8538	0.0001164	0.0006339	4.9189	4.4299	5.3071	5.0394	4.6211	4.3033	4.923	5.2122	5.3223	4.7803	4.5043	5.0927	5.1196	4.9383	5.8833	5.6262	5.9778	6.3261	6.0479	5.8909	5.5087	4.7668	5.3357	5.9536
neg_3942	2,2,6,6-Tetramethyl-4-piperidinone	metab_228	-	HMDB0031179	200.129	neg	M+FA-H	C9H17NO	3.33372	826-36-8	-	-	-	-	-	Organoheterocyclic compounds	Piperidines	Piperidinones	1.0025	1.0122	0.8308	1.742e-06	2.283e-05	4.8061	3.6982	4.0852	4.1555	4.115	4.2186	4.152	3.8346	3.9978	4.1543	4.3665	4.0033	4.3348	3.0538	4.9522	4.8524	5.0197	4.8959	5.2174	4.4768	4.5973	4.7813	5.0668	5.134
