# Supplementary material for: Gut Microbiota and Related Metabolites Were Disturbed in Ulcerative Colitis and Partly Restored After Mesalamine Treatment
Source: Front Pharmacol. 2021 Jan 18;11:620724. doi: 10.3389/fphar.2020.620724 (PMC7898679; doi:10.3389/fphar.2020.620724)
Supplement: Supplementary file 4 [file table4.xlsx]

## Sheet: 组间差异详情表
ID	Metabolite	Metab ID	KEGG Compound ID	Library ID	M/Z	Mode	Adducts	Formula	Retention time	CAS ID	KEGG Compound First Category	KEGG Compound Second Category	KEGG Pathway ID	KEGG Pathway First Category	KEGG Pathway Second Category	HMDB Superclass	HMDB Class	HMDB Subclass	VIP_pred_OPLS-DA	VIP_PLS-DA	FC(N/M)	P_value	FDR	N01	N02	N03	N04	N05	N06	N07	N08	N09	N10	M01	M02	M03	M04	M05	M06	M07	M08	M09	M10	M11	M12	M13	M14
pos_15236	L-Isoleucine	metab_122	C00407	HMDB0000172;HMDB0000557	132.102	pos	M+H	C6H13NO2	3.95947	73-32-5	Peptides	Amino acids	map01100;map04978;map01110;map00280;map00290;map00460;map00960;map02010;map01230;map00966;map01210;map04974;map00970;map01130;map05230;map01064;map01060	Metabolism;Organismal Systems;Metabolism;Metabolism;Metabolism;Metabolism;Metabolism;Environmental Information Processing;Metabolism;Metabolism;Metabolism;Organismal Systems;Genetic Information Processing;Metabolism;Human Diseases;Metabolism;Metabolism	Global and overview maps;Digestive system;Global and overview maps;Amino acid metabolism;Amino acid metabolism;Metabolism of other amino acids;Biosynthesis of other secondary metabolites;Membrane transport;Global and overview maps;Biosynthesis of other secondary metabolites;Global and overview maps;Digestive system;Translation;Global and overview maps;Cancers: Overview;Chemical structure transfor…	Organic acids and derivatives	Carboxylic acids and derivatives	Amino acids, peptides, and analogues	2.6186	2.6015	2.5648	5.58e-16	1.975e-13	6.4115	7.0747	6.082	6.1842	6.131	6.261	5.9998	6.1252	6.1145	6.1991	2.8809	2.1234	3.8424	2.5093	2.0681	2.1541	2.0801	3.0542	2.1012	2.0625	2.952	2.0498	2.1421	2.136
pos_16422	Indole	metab_110	C19907;C00463	HMDB0000738;HMDB0035924	118.065	pos	M+H	C8H7N	3.29743	120-72-9	-	-	map01100;map01110;map04974;map00402;map00400;map00380	Metabolism;Metabolism;Organismal Systems;Metabolism;Metabolism;Metabolism	Global and overview maps;Global and overview maps;Digestive system;Biosynthesis of other secondary metabolites;Amino acid metabolism;Amino acid metabolism	Organoheterocyclic compounds	Indoles and derivatives	Indoles	2.4229	2.4157	2.5122	2.886e-11	1.703e-09	5.4562	5.4619	5.6213	5.7924	5.6978	5.5414	5.5008	5.5061	5.4481	5.5434	1.8659	3.4968	1.8495	2.2752	1.7667	3.7158	1.7786	1.8367	1.7995	2.5269	1.7928	1.7486	2.6811	1.834
pos_14741	Petasinine	metab_175	-	HMDB0030516	222.147	pos	M+H-H2O	C13H21NO3	4.108	70474-33-8	-	-	-	-	-	Organoheterocyclic compounds	Pyrrolizidines	-	2.349	2.3455	2.0675	9.976e-12	8.829e-10	6.8221	5.9236	5.791	6.1394	5.9198	6.9442	6.712	5.2883	6.2162	6.7073	3.6355	4.0402	2.9438	3.4365	3.6909	2.3893	3.0903	3.6377	3.4412	3.097	2.7054	2.0004	2.0925	2.0864
pos_7494	D-Urobilin	metab_94	C05795	HMDB0004161	611.286	pos	M+Na	C33H40N4O6	7.45105	3947-38-4	-	-	map01100;map01110;map00860	Metabolism;Metabolism;Metabolism	Global and overview maps;Global and overview maps;Metabolism of cofactors and vitamins	Organoheterocyclic compounds	Tetrapyrroles and derivatives	Bilirubins	2.184	2.1934	2.1491	3.432e-06	4.19e-05	7.0913	6.1454	5.9497	5.438	6.5376	7.4034	6.3766	5.1992	6.7358	6.5637	4.5352	4.8519	4.7568	0.4803	0.4314	3.8576	0.439	3.4194	3.1262	3.4991	0.4483	4.4602	2.8257	4.2015
pos_492	Latanoprost ethyl amide	metab_119	-	-	418.295	pos	M+H, 2M+ACN+H, M+Na	C25H39NO4	9.13558	-	-	-	-	-	-	-	-	-	2.1753	2.1793	0.3293	0.001496	0.005693	0.2472	0.1344	5.4575	5.741	0.1691	0.1919	5.2898	0.1337	0.1498	0.1808	6.5403	4.7702	5.3343	5.5811	6.3522	6.5455	4.8188	5.1467	4.3625	4.408	5.8642	3.8958	6.4876	5.1452
pos_18114	Creatine	metab_79	C00300	HMDB0000064	132.077	pos	M+H	C4H9N3O2	0.6717	57-00-1	-	-	map01100;map00330;map00260	Metabolism;Metabolism;Metabolism	Global and overview maps;Amino acid metabolism;Amino acid metabolism	Organic acids and derivatives	Carboxylic acids and derivatives	Amino acids, peptides, and analogues	2.1745	2.1509	2.3019	1.806e-05	0.0001487	4.8776	6.6702	6.7473	6.7988	6.4295	6.4921	5.281	5.8822	6.308	5.214	0.0142	3.0884	4.5676	4.5493	4.7469	4.6842	3.8954	3.9856	2.5632	0.0111	4.1012	0.0108	0.0133	0.6858
neg_5448	Simvastatin hydroxy acid	metab_374	-	HMDB0061047	435.273	neg	M-H	C25H40O6	5.88958	-	-	-	-	-	-	Organic acids and derivatives	Hydroxy acids and derivatives	Medium-chain hydroxy acids and derivatives	2.1358	2.1506	0.501	5.323e-06	5.888e-05	2.8368	2.353	2.3975	2.5284	6.033	2.7086	2.4421	2.3781	2.7528	2.7054	6.2356	6.3175	5.3192	5.9061	5.7906	6.119	4.4933	6.1637	6.343	5.3843	5.5061	5.2321	6.5919	6.018
neg_8965	CPA(18:0/0:0)	metab_273	-	HMDB0007004	419.253	neg	M-H	C21H41O6P	9.33725	-	-	-	-	-	-	Lipids and lipid-like molecules	Glycerophospholipids	Glycerophosphates	2.117	2.1307	2.156	3.099e-06	3.919e-05	6.1554	6.6008	6.218	5.175	5.547	5.5471	5.5019	5.827	5.9395	6.239	4.3105	1.0443	2.7074	3.4153	3.257	0.9885	5.0125	0.9487	1.01	4.5106	3.9218	4.4832	0.8055	1.7318
neg_3421	Portulacaxanthin II	metab_367	C08565	HMDB0012281	373.106	neg	M-H	C18H18N2O7	2.3556	-	-	-	map01110;map00965	Metabolism;Metabolism	Global and overview maps;Biosynthesis of other secondary metabolites	Organic acids and derivatives	Carboxylic acids and derivatives	Amino acids, peptides, and analogues	2.0892	2.0937	0.4908	1.295e-07	3.82e-06	2.6238	3.0609	3.0135	2.6336	1.3315	2.4104	3.9831	2.2175	3.9514	2.3049	6.7538	5.4083	6.9563	4.5211	5.4356	6.7284	4.4655	4.3102	4.9247	4.5864	5.4237	5.2813	7.1738	6.5506
pos_1273	N-Phenylacetylglutamic acid	metab_157	-	HMDB0059772	553.18	pos	M+Na, 2M+Na	C13H15NO5	3.95947	-	-	-	-	-	-	Organic acids and derivatives	Carboxylic acids and derivatives	Amino acids, peptides, and analogues	2.0396	2.0187	3.766	2.546e-06	3.688e-05	4.1145	5.4174	3.5444	3.7869	3.9782	3.4452	3.58	4.2863	3.2582	3.5333	3.9269	0.1372	0.1162	0.1425	0.1227	0.1457	0.1257	0.1414	3.3268	0.1214	1.3567	1.2333	3.4396	0.1406
neg_10291	D8'-Merulinic acid A	metab_277	-	HMDB0041454	779.547	neg	2M-H	C24H38O4	7.5752	69506-65-6	-	-	-	-	-	Benzenoids	Benzene and substituted derivatives	Benzoic acids and derivatives	2.0055	1.9993	0.5794	1.388e-05	0.000126	3.1046	2.6202	2.6648	3.8195	3.3514	2.9762	4.6023	2.6454	3.0205	5.7594	6.0462	5.6525	6.1133	6.3927	5.869	5.8537	5.6227	5.9928	5.5924	6.376	5.5814	6.7174	5.3749	6.3229
neg_7546	DG(20:3n9/0:0/18:2n6)	metab_281	-	HMDB0056237	701.532	neg	M+FA-H	C42H72O5	11.3211	-	-	-	-	-	-	Lipids and lipid-like molecules	Fatty Acyls	Eicosanoids	1.9739	1.9707	0.5844	2.797e-06	3.806e-05	3.5103	2.2229	4.5085	3.2001	4.0262	3.9861	3.4412	2.248	3.6513	5.47	6.8945	6.9372	4.9083	5.2528	5.4314	7.0868	6.0988	6.7895	5.6462	4.6811	6.7269	6.8926	6.5119	7.0048
pos_12620	2-Hydroxy-3-methoxyestrone	metab_16	-	HMDB0011195	406.328	pos	M+H-2H2O	C25H47NO5	6.39092	-	-	-	-	-	-	Organic acids and derivatives	Hydroxy acids and derivatives	Beta hydroxy acids and derivatives	1.9351	1.9402	0.1665	0.0005476	0.002655	0.0046	0.0022	0.0022	0.0034	5.549	0.0033	0.0027	0.0022	0.0025	0.0031	2.8225	4.5763	3.8697	4.02	3.3786	3.9338	2.878	2.3854	4.2091	1.364	2.5909	3.481	3.3515	4.0196
neg_5924	Notoginsenoside R10	metab_351	-	HMDB0039051	589.31	neg	M+Cl	C30H50O9	6.9282	335157-20-5	-	-	-	-	-	Lipids and lipid-like molecules	Steroids and steroid derivatives	Steroidal glycosides	1.8907	1.8905	1.9294	9.079e-05	0.0006181	5.8893	4.8665	5.691	5.5312	6.4899	6.2767	5.2092	7.0189	6.3096	5.7222	4.8388	5.1057	1.8736	3.2283	5.5524	5.7187	2.6045	0.5158	0.5645	0.3572	4.2416	1.1782	2.7577	4.269
neg_1777	Stearoyllactic acid	metab_379	-	HMDB0033372;LMFA07011021	377.242	neg	M-H, M+Na-2H	C21H40O4	9.87463	4253-64-9	-	-	-	-	-	Lipids and lipid-like molecules	Fatty Acyls	Fatty acid esters	1.8776	1.8655	0.5482	7.381e-05	0.0005226	5.0254	2.0475	1.8339	3.1426	3.7653	2.1426	1.8781	1.8148	2.7609	4.6671	5.519	5.005	5.3241	5.3309	5.1585	4.4807	6.1299	5.6771	4.867	6.1043	4.2116	4.4609	5.2433	6.7585
neg_15392	N2-Fructopyranosylarginine	metab_338	-	HMDB0041541	335.155	neg	M-H	C12H24N4O7	0.6106	162966-07-6	-	-	-	-	-	Organic acids and derivatives	Carboxylic acids and derivatives	Amino acids, peptides, and analogues	1.8623	1.8747	2.0889	1.148e-06	2.032e-05	5.6287	4.0979	4.2019	4.0319	4.9775	4.8307	4.4776	4.8454	4.6583	4.5357	3.4645	2.439	0.6977	0.8606	0.8515	2.2767	1.5508	1.5404	1.1107	3.1261	4.2587	3.2507	2.279	3.317
pos_11789	Ankorine	metab_50	C09337	-	336.219	pos	M+H	C19H29NO4	7.65798	-	-	-	map00950	Metabolism	Biosynthesis of other secondary metabolites	-	-	-	1.8485	1.8644	0.3466	0.0006257	0.002993	1.0826	0.7957	0.8037	6.2973	0.897	0.956	0.8688	0.7933	0.8425	0.9278	5.4935	2.4709	4.6921	4.5473	4.2695	3.6416	3.6495	4.3048	3.9519	4.3222	4.829	2.8487	6.1697	2.4064
pos_6813	Crucigasterin 277	metab_80	-	LMSP01080036	278.248	pos	M+H	C18H31NO	5.61142	-	-	-	-	-	-	-	-	-	1.8467	1.832	1.5416	2.585e-10	1.307e-08	5.6924	5.7897	5.9252	5.9271	5.8055	5.1811	5.5438	5.6735	5.6876	5.9001	3.8063	2.6121	3.6802	3.892	4.4042	3.8684	3.24	4.3124	4.3068	3.7134	3.8198	3.8704	3.7377	2.6247
pos_16224	Sphingosine 1-phosphate	metab_195	C06124	HMDB0000277	362.244	pos	M+H-H2O	C18H38NO5P	3.44755	26993-30-6	-	-	map01100;map04666;map05152;map00600;map04080;map04020;map04371;map04072;map04071	Metabolism;Organismal Systems;Human Diseases;Metabolism;Environmental Information Processing;Environmental Information Processing;Environmental Information Processing;Environmental Information Processing;Environmental Information Processing	Global and overview maps;Immune system;Infectious diseases: Bacterial;Lipid metabolism;Signaling molecules and interaction;Signal transduction;Signal transduction;Signal transduction;Signal transduction	Lipids and lipid-like molecules	Sphingolipids	Phosphosphingolipids	1.8415	1.8483	1.9023	1.93e-06	3.105e-05	5.7881	3.8143	5.0785	4.4685	5.2058	5.5439	5.4958	4.3852	5.5552	5.0962	2.296	4.3025	3.0297	3.3271	0.4156	3.2113	2.1464	2.7127	2.3463	0.657	2.123	3.6333	2.5393	4.3717
neg_15067	Neoacrimarine F	metab_347	-	HMDB0031112	530.142	neg	M-H	C29H25NO9	1.14703	195057-36-4	-	-	-	-	-	Organoheterocyclic compounds	Quinolines and derivatives	Benzoquinolines	1.8336	1.8266	0.4339	0.0007876	0.003485	1.2417	0.8049	5.8598	3.1303	2.7724	1.1217	0.8815	0.8263	1.1628	1.1187	3.9283	5.0482	2.8135	4.1867	4.1307	4.6701	4.1459	4.7251	4.6091	4.0656	3.69	5.2699	4.7664	4.9907
pos_8029	(3beta,11alpha,13beta)-3,11,13-Oleananetriol	metab_3	-	HMDB0034521	461.397	pos	M+H	C30H52O3	8.72625	85643-69-2	-	-	-	-	-	Lipids and lipid-like molecules	Prenol lipids	Triterpenoids	1.8282	1.8014	0.3942	0.005675	0.01703	5.0267	0.0004	3.5407	0.0006	0.0005	5.8608	3.3252	0.0004	0.0005	0.0006	4.4423	5.6227	4.9713	5.5316	4.3937	4.9657	3.403	3.7907	4.1302	3.7482	3.5419	5.2447	4.6544	4.6234
pos_12175	Oleoyl Ethanolamide	metab_161	-	-	326.305	pos	M+H	C20H39NO2	7.10043	-	-	-	-	-	-	-	-	-	1.8156	1.8096	1.6716	4.508e-06	5.147e-05	6.9527	5.1051	5.6134	5.2022	5.8999	6.4479	5.9322	6.1888	5.6109	5.2911	5.5265	4.2606	3.8815	3.6367	1.7607	3.8895	1.7726	2.5843	5.0578	4.5485	1.7868	2.5845	3.9456	3.54
pos_18008	Isopropyl beta-D-glucoside	metab_113	-	HMDB0032705	264.144	pos	M+ACN+H	C9H18O6	0.86705	5391-17-3	-	-	-	-	-	Organic oxygen compounds	Organooxygen compounds	Carbohydrates and carbohydrate conjugates	1.7907	1.7876	2.2164	6.687e-06	7.173e-05	4.6761	3.7342	3.659	4.1916	4.184	4.049	4.342	3.7219	4.1409	4.6794	3.1232	3.4678	2.3049	0.7487	0.6879	0.7581	0.6975	3.1657	0.7146	2.7315	0.7091	0.6733	3.1702	3.1848
neg_13684	Marmesin rhamnoside	metab_329	-	HMDB0039564	373.13	neg	M-H2O-H	C20H24O8	3.48705	142347-99-7	-	-	-	-	-	Phenylpropanoids and polyketides	Coumarins and derivatives	Furanocoumarins	1.7682	1.7853	0.3491	0.003247	0.01095	2.4425	1.5399	0.0125	4.5821	0.0366	0.0252	0.0138	0.0119	0.0278	5.7276	4.8818	5.0136	3.1923	3.7705	3.862	4.1931	0.6667	4.7714	4.8571	4.6919	4.5396	4.6303	3.9215	4.8399
neg_15442	Pseudomonine	metab_368	-	HMDB0041438	375.132	neg	M+FA-H	C16H18N4O4	0.591083	172923-94-3	-	-	-	-	-	Organic acids and derivatives	Carboxylic acids and derivatives	Amino acids, peptides, and analogues	1.7581	1.7717	2.1855	8.334e-06	8.338e-05	5.0816	4.4056	2.413	5.1405	4.4343	3.6691	4.2245	4.8567	3.8655	3.7386	3.2755	0.5274	0.1865	2.5645	1.2064	0.582	2.5359	0.3953	1.7797	2.6254	3.1092	2.3513	2.7952	2.8675
neg_11	(4E,7E,10Z,13E,16E,19E)-docosa-4,7,10,13,16,19-hexaenoic acid	metab_219	-	-	327.232	neg	M-H, 2M-H, M+FA-H, M+Cl, M+K-2H	C22H32O2	8.69762	-	-	-	-	-	-	-	-	-	1.7457	1.7549	0.693	9.058e-08	3.206e-06	4.1994	4.7451	4.9929	4.2933	3.9029	3.1159	4.209	3.8189	4.5862	4.7131	6.2236	5.7201	5.4745	5.7688	6.6785	6.3325	6.5031	6.4156	6.5303	5.9823	6.7472	5.4648	6.2194	5.9518
neg_4006	Nomilinic acid 17-glucoside	metab_349	-	HMDB0037892	747.262	neg	M+Cl	C34H48O16	3.45345	113301-65-8	-	-	-	-	-	Lipids and lipid-like molecules	Saccharolipids	-	1.7442	1.7253	0.5341	0.003513	0.01162	3.7481	1.9131	0.4276	0.5144	5.3052	3.9023	3.1295	5.5412	0.682	1.8872	5.1433	5.4222	4.4268	4.6051	5.3327	5.3313	4.7533	5.1582	5.1815	4.2978	4.9865	5.5475	4.9761	5.7426
neg_8950	N-Oleoyl phenylalanine	metab_348	-	LMFA08020092;HMDB0062336	474.32	neg	M+FA-H	C27H43NO3	9.34735	-	-	-	-	-	-	Organic acids and derivatives	Carboxylic acids and derivatives	Amino acids, peptides, and analogues	1.7425	1.7252	1.8155	5.075e-05	0.0003666	5.59	4.198	5.5951	5.1792	5.6195	5.5219	5.2036	3.6785	5.5214	5.2533	4.0056	3.0634	4.3977	4.1293	1.0418	1.2895	3.2567	4.3892	1.3122	3.7998	1.0833	1.4279	4.8924	1.5127
pos_7167	Trans-EKODE-(E)-Ib	metab_206	-	-	311.222	pos	M+H	C18H30O4	6.4007	-	-	-	-	-	-	-	-	-	1.6829	1.6843	1.587	3.453e-08	1.358e-06	4.6511	4.7964	5.5594	4.4642	4.7216	4.8368	5.3852	5.1033	4.6801	5.0307	3.5685	2.459	3.3424	3.1051	2.089	3.0021	3.3733	4.0219	3.1358	2.0834	2.1154	3.5948	3.424	4.1084
pos_8174	Isozeaxanthin	metab_114	-	HMDB0036922	551.424	pos	M+H-H2O	C40H56O2	9.07582	29065-03-0	-	-	-	-	-	Lipids and lipid-like molecules	Prenol lipids	Tetraterpenoids	1.679	1.6762	0.7083	8.479e-06	8.338e-05	3.7277	3.6137	5.0654	3.3128	4.5044	5.1458	5.2602	4.069	3.7774	4.5519	6.2576	6.2362	5.9685	5.7878	6.215	6.2208	5.4144	6.0571	5.8344	5.6326	6.4355	6.6969	6.0638	6.2359
pos_7702	4,4-Dimethylcholesta-8,14,24-trienol	metab_26	C11455	HMDB0001023	411.36	pos	M+H	C29H46O	8.02495	64284-64-6	-	-	map01100;map01130;map00100	Metabolism;Metabolism;Metabolism	Global and overview maps;Global and overview maps;Lipid metabolism	Lipids and lipid-like molecules	Steroids and steroid derivatives	Cholestane steroids	1.652	1.6512	0.7304	2.917e-07	6.453e-06	5.3336	4.1667	4.428	3.7023	4.2652	4.1818	4.2919	3.9306	4.7795	4.6748	6.2717	6.4728	5.7693	5.9885	5.9498	5.7017	6.0623	6.2175	5.7589	5.7896	6.0608	5.9668	5.83	6.0173
neg_3239	PISCIDIC ACID	metab_362	-	-	255.051	neg	M-H	C11H12O7	1.81503	-	-	-	-	-	-	-	-	-	1.647	1.6287	1.9876	0.0003042	0.001607	4.6646	4.237	3.8283	4.7867	4.7836	4.5401	4.2936	4.5025	4.8355	4.5115	0.5748	3.813	4.556	4.4949	0.3645	0.5348	0.298	1.637	2.7109	1.1936	4.3773	3.9194	0.3973	2.8037
pos_31	Linoleoyl Ethanolamide	metab_121	C13828	HMDB0012252;HMDB0013624	324.29	pos	M+H, M+K, 2M+H, 2M+Na, M+Na	C20H37NO2	8.27383	68171-52-8	-	-	-	-	-	Organic nitrogen compounds	Organonitrogen compounds	Amines	1.642	1.6329	0.692	2.076e-05	0.000167	5.449	2.918	4.1611	3.4814	4.0287	5.2244	4.5285	5.1406	3.7679	3.6489	5.6047	4.9654	7.7857	6.654	6.3948	5.1712	6.2005	5.817	5.7481	7.1253	5.9647	5.5485	6.4635	6.2417
pos_8073	Deoxycholic acid 3-glucuronide	metab_86	C03033	HMDB0002596;LMST05010046	607.29	pos	M+K	C30H48O10	8.80457	72504-58-6	-	-	map01100;map00040;map04976	Metabolism;Metabolism;Organismal Systems	Global and overview maps;Carbohydrate metabolism;Digestive system	Lipids and lipid-like molecules	Steroids and steroid derivatives	Steroidal glycosides	1.6384	1.6238	1.964	0.0001883	0.001093	4.6354	4.9944	5.7727	4.3662	4.1113	4.3813	3.6231	4.8449	4.2186	3.795	3.2279	0.7045	0.0055	1.9392	1.3785	3.6552	2.7023	4.112	4.2348	0.0057	3.053	0.0056	2.8472	4.0229
pos_139	13Z-Docosenamide	metab_9	-	-	338.343	pos	M+H, 2M+Na, 2M+H, M+Na	C22H43NO	9.818	-	-	-	-	-	-	-	-	-	1.6201	1.6185	0.7805	2.909e-12	3.433e-10	5.2881	5.253	5.4199	5.5	5.3255	5.4865	5.1698	5.3291	5.3268	5.4569	6.9366	6.6615	6.7295	6.7912	7.01	6.5573	7.4617	7.1221	6.8687	7.1769	6.9849	6.761	6.8272	6.1849
pos_18174	D-Pipecolic acid	metab_93	-	HMDB0005960	130.087	pos	M+H	C6H11NO2	0.599633	1723-00-8	-	-	-	-	-	Organic acids and derivatives	Carboxylic acids and derivatives	Amino acids, peptides, and analogues	1.6169	1.6161	1.3491	1.736e-11	1.229e-09	6.2074	6.2931	5.6379	5.7827	5.8506	5.6906	5.9009	5.5868	5.5138	5.6598	4.663	4.5061	4.0833	4.3739	3.7764	4.4722	4.3192	3.9655	4.395	4.3792	4.2071	4.404	4.4715	4.299
pos_231	Corey PG-Lactone Diol	metab_78	-	-	269.175	pos	M+H, M+ACN+Na, M+H-H2O	C15H24O4	2.56685	-	-	-	-	-	-	-	-	-	1.6036	1.5788	0.6306	0.0009873	0.004099	4.7326	2.0478	1.7733	4.9664	3.7804	2.1974	3.9385	1.7612	2.4246	4.0272	4.8894	5.3987	4.3697	4.133	4.251	5.1235	5.347	5.1928	5.4087	5.0202	5.1258	5.0904	5.3405	5.5785
neg_3619	RHOIFOLIN	metab_371	C12627	HMDB0038848	577.153	neg	M-H	C27H30O14	2.67285	17306-46-6	-	-	map00944	Metabolism	Biosynthesis of other secondary metabolites	-	-	-	1.6004	1.6074	0.4654	0.008682	0.0237	0.5204	0.2449	1.8706	2.9533	3.6705	0.4349	2.2793	7.0537	0.4634	0.4328	3.2507	3.8312	3.7901	4.1364	4.8607	4.6912	3.213	4.9826	5.4487	5.0558	4.6232	5.3574	3.5981	3.0804
pos_1543	9,10,13-Trihydroxystearic acid	metab_40	-	HMDB0030935	355.263	pos	M+H, M+Na	C18H36O5	4.95625	50439-74-2	-	-	-	-	-	Lipids and lipid-like molecules	Fatty Acyls	Fatty acids and conjugates	1.5873	1.5846	0.6908	3.636e-05	0.0002682	4.3505	2.6217	3.2625	3.8003	3.4623	3.6559	4.9061	2.7376	4.7597	4.3646	4.9849	5.1243	6.1154	5.5645	5.6514	4.98	4.829	5.3741	5.2764	6.4512	5.585	5.3387	6.1295	5.4352
neg_13958	Cynaroside A	metab_276	-	HMDB0040532	465.177	neg	M+Na-2H	C21H32O10	3.14673	117804-06-5	-	-	-	-	-	Lipids and lipid-like molecules	Prenol lipids	Terpene lactones	1.5872	1.5767	0.5788	0.001042	0.004236	2.5586	3.1549	1.4154	1.5424	1.8841	3.0178	2.7518	5.6368	1.7622	1.7156	4.2274	4.8284	3.5452	3.9501	4.3707	4.9949	4.4432	3.9422	4.1737	4.3381	4.6931	4.1602	4.6865	5.1816
pos_146	Gingerglycolipid A	metab_103	-	HMDB0041093	699.355	pos	M+H-H2O, M+K, M+Na, M+H	C33H56O14	7.18203	145937-22-0	-	-	-	-	-	Lipids and lipid-like molecules	Glycerolipids	Glycosylglycerols	1.5846	1.6124	1.8129	0.0001114	0.000744	4.4632	4.523	4.7382	3.5589	4.7244	6.2078	4.1048	5.142	4.7063	4.8248	2.7829	3.1481	1.6724	0.809	0.7463	3.2431	3.6752	4.4335	0.7739	4.8246	0.7682	2.9383	2.4831	3.9917
pos_13828	Cucurbitachrome 1	metab_81	-	HMDB0041581	645.393	pos	M+2Na-H	C40H56O4	4.88698	181229-73-2	-	-	-	-	-	Lipids and lipid-like molecules	Prenol lipids	Tetraterpenoids	1.5818	1.5959	0.4268	0.003798	0.01211	0.9334	3.8562	0.6687	0.816	0.7563	0.8122	0.7298	5.6611	0.705	0.7855	3.4716	4.3545	2.9054	4.7487	4.1023	2.9602	4.0732	3.3662	3.5905	4.1032	3.5294	2.1554	3.9458	4.2574
neg_798	Sesaminol glucosyl-(1->2)-[glucosyl-(1->6)]-glucoside	metab_373	-	HMDB0041211	901.263	neg	M+Cl, M+FA-H	C38H48O22	3.27782	157469-83-5	-	-	-	-	-	Lignans, neolignans and related compounds	Lignan glycosides	-	1.5717	1.5757	0.2568	0.004795	0.01463	0.005	0.0017	0.0018	0.0025	2.5378	0.0038	0.002	5.5615	0.0042	0.0037	0.3948	2.685	3.4912	0.2366	4.7697	4.4811	3.8139	4.2794	4.2558	2.5546	4.5631	4.6594	3.5288	0.5755
neg_2030	Lucyobroside	metab_313	-	HMDB0031983	744.522	neg	M+Cl, M+FA-H	C39H73NO9	10.4117	189272-90-0	-	-	-	-	-	Lipids and lipid-like molecules	Sphingolipids	Glycosphingolipids	1.564	1.5584	0.7027	0.0005103	0.002618	4.5014	4.8935	3.7773	5.0837	5.8521	4.6115	2.483	3.9228	3.2604	2.7463	6.2615	5.8752	5.2014	5.8452	6.4184	5.4847	5.4629	6.1666	6.2487	5.4073	5.7613	5.7949	5.6084	6.4005
pos_112	ENOXOLONE	metab_97	C02283	HMDB0011628	471.346	pos	M+H, 2M+H, 2M+Na, 2M+K	C30H46O4	7.61817	-	-	-	-	-	-	Lipids and lipid-like molecules	Prenol lipids	Triterpenoids	1.5616	1.5482	0.7157	0.0009958	0.004099	5.4585	4.0077	4.2339	5.4863	6.0722	4.2024	3.9506	2.1451	6.479	4.7441	6.0181	7.5488	5.8138	5.9937	7.1389	6.4564	5.6437	6.0005	7.5449	7.1362	6.172	7.3313	6.2519	6.4499
pos_2492	L-a-Lysophosphatidylserine	metab_118	-	-	526.314	pos	M+H, M+Na	C24H48NO9P	9.23597	-	-	-	-	-	-	-	-	-	1.5419	1.5567	0.7127	1.847e-06	3.105e-05	4.4946	5.1371	4.5269	3.789	3.5336	4.0152	3.9742	4.3542	3.233	4.3963	6.2172	5.032	5.7443	6.1438	6.1001	5.9554	6.8867	6.0901	5.4303	6.4171	6.2006	5.3342	5.9576	3.9164
pos_17003	Isobutyryl carnitine	metab_112	-	-	232.156	pos	M+H	C11H21NO4	2.74272	-	-	-	-	-	-	-	-	-	1.5358	1.5378	1.4912	1.25e-07	3.82e-06	5.2125	4.3062	4.1125	5.0625	4.6634	4.782	4.6815	4.6731	4.5791	5.1943	2.5935	3.3877	2.9781	3.6236	2.2599	4.1955	3.3712	3.0791	3.41	3.5132	2.2863	2.2416	3.6009	3.8413
pos_13728	5-(14-Nonadecenyl)-1,3-benzenediol	metab_31	-	HMDB0031677	397.306	pos	M+Na	C25H42O2	5.01815	187523-39-3	-	-	-	-	-	Benzenoids	Phenols	Benzenediols	1.5314	1.5286	1.4637	0.0001427	0.0008864	6.1912	4.6321	5.6838	5.851	6.4202	6.5746	5.9977	6.4785	6.4387	6.2126	4.6342	5.0492	5.3102	5.042	3.4887	3.6153	4.5901	4.753	4.5595	4.6143	1.2393	1.1971	4.4108	5.3431
pos_18172	4-Pyrimidine Methanamine (hydrochloride)	metab_30	-	-	110.072	pos	M+H	C5H7N3	0.599633	-	-	-	-	-	-	-	-	-	1.5247	1.5171	1.485	2.013e-07	5.482e-06	4.2858	5.5428	4.7363	4.826	4.2828	4.012	4.3348	4.8671	4.4972	4.1176	4.0952	2.7926	2.6474	2.7812	3.2692	2.9887	3.7975	2.7662	3.1691	3.3864	2.9688	2.39	3.3574	2.484
pos_650	DEHYDRO (11,12)URSOLIC ACID LACTONE	metab_83	-	-	455.351	pos	M+H-H2O, M+H, M+H-2H2O	C30H46O3	7.36745	-	-	-	-	-	-	-	-	-	1.5168	1.507	0.7264	0.0003108	0.001618	4.9614	3.4009	3.4104	4.6131	3.7188	4.2796	3.9858	3.3981	6.4014	4.8335	5.7109	6.6675	5.5823	5.5964	6.0994	6.1139	5.0292	6.1552	5.7895	5.7766	5.5744	6.6467	6.0353	6.1063
neg_15191	N-acetylaspartate	metab_339	C01042	HMDB0000812	174.041	neg	M-H	C6H9NO5	0.952817	-	-	-	map01100;map00250	Metabolism;Metabolism	Global and overview maps;Amino acid metabolism	Organic acids and derivatives	Carboxylic acids and derivatives	Amino acids, peptides, and analogues	1.5002	1.4888	1.3762	3.686e-06	4.35e-05	5.8011	5.133	5.4535	5.0778	6.3215	4.2818	5.6468	4.995	5.7824	5.0708	3.4924	4.0216	4.004	4.1976	4.3514	4.1797	2.8261	4.2608	4.3534	3.1834	4.0701	3.9769	3.5732	4.0036
pos_17689	Styrene	metab_200	C07083;C19506	HMDB0034240	105.07	pos	M+H	C8H8	2.16362	100-42-5	-	-	map01100;map01220;map01120;map00642;map00643	Metabolism;Metabolism;Metabolism;Metabolism;Metabolism	Global and overview maps;Global and overview maps;Global and overview maps;Xenobiotics biodegradation and metabolism;Xenobiotics biodegradation and metabolism	Benzenoids	Benzene and substituted derivatives	Styrenes	1.4876	1.4998	1.6309	0.0002351	0.00128	5.752	4.5674	4.9007	4.0989	6.0343	5.2729	5.1106	4.2008	4.9448	4.1229	4.2662	1.3947	4.0704	3.727	2.4163	1.4244	4.2211	1.4095	2.0454	5.1172	1.3667	3.853	4.5491	2.2028
pos_3203	N-Undecanoylglycine	metab_159	-	HMDB0013286	226.18	pos	M+H-H2O, M+H	C13H25NO3	4.90802	-	-	-	-	-	-	Organic acids and derivatives	Carboxylic acids and derivatives	Amino acids, peptides, and analogues	1.4866	1.4792	1.3018	9.446e-15	1.672e-12	5.3056	5.3088	5.4489	5.4546	5.3758	5.4707	5.1143	5.4644	5.3031	5.4892	4.3185	4.297	4.0903	4.1854	4.2843	4.1269	4.3104	4.3299	4.3016	3.9699	4.0957	3.6908	3.9992	3.7958
neg_15019	Valyl-Proline	metab_392	-	HMDB0029135	213.124	neg	M-H	C10H18N2O3	1.4094	-	-	-	-	-	-	Organic acids and derivatives	Carboxylic acids and derivatives	Amino acids, peptides, and analogues	1.4782	1.4989	1.5671	0.0001162	0.0007617	5.2152	4.7366	4.7712	5.1946	5.1058	4.9398	4.6956	4.7313	4.8762	5.0302	4.0603	3.3175	2.8089	2.9343	0.9436	1.1864	4.2145	3.8878	4.4586	3.4671	3.4967	4.0209	0.9938	4.2506
neg_7621	Ethyl maltol	metab_287	C20362	HMDB0031735	121.031	neg	M-H2O-H	C7H8O3	12.2258	4940-11-8	-	-	-	-	-	Organoheterocyclic compounds	Pyrans	Pyranones and derivatives	1.4532	1.4349	0.7519	0.0001293	0.0008173	5.032	3.4189	2.6702	4.3589	4.5724	4.7852	4.2399	3.7206	4.0635	4.3542	5.727	5.6514	5.1445	5.3598	5.3262	5.6274	5.2793	5.531	5.5721	5.3671	5.3436	5.6402	5.3704	5.8058
pos_17799	6-Acetyl-2,3-dihydro-2-(hydroxymethyl)-4(1H)-pyridinone	metab_36	-	HMDB0035178	152.071	pos	M+H-H2O	C8H11NO3	2.07833	214218-63-0	-	-	-	-	-	Organoheterocyclic compounds	Pyridines and derivatives	Hydropyridines	1.4504	1.4174	1.6257	0.00053	0.002642	4.6748	3.9866	4.2399	4.6825	4.7701	4.7527	4.459	4.4446	4.6874	4.8232	1.3911	1.348	3.0693	3.6234	4.809	4.521	1.3064	5.0321	3.1466	1.2895	3.688	1.2774	3.3408	1.3601
neg_8095	Ceramide (d18:1/9Z-18:1)	metab_267	C00195	HMDB0004948	608.521	neg	M+FA-H	C36H69NO3	11.4942	-	-	-	map01100;map05140;map00600;map04933;map04920;map04071;map04722;map04931	Metabolism;Human Diseases;Metabolism;Human Diseases;Organismal Systems;Environmental Information Processing;Organismal Systems;Human Diseases	Global and overview maps;Infectious diseases: Parasitic;Lipid metabolism;Endocrine and metabolic diseases;Endocrine system;Signal transduction;Nervous system;Endocrine and metabolic diseases	Lipids and lipid-like molecules	Sphingolipids	Ceramides	1.4428	1.4272	0.7412	0.0001718	0.001013	5.5203	3.1109	3.8565	2.9806	4.0096	4.5057	3.9969	4.9769	4.8843	3.9693	6.141	4.8591	5.4992	5.088	5.9388	4.9479	5.241	5.5009	6.2128	6.25	5.4776	6.0031	5.9258	5.8902
neg_11580	13(S)-HpODE	metab_225	C04717	HMDB0003871	311.222	neg	M-H	C18H32O4	5.74355	-	-	-	map01100;map00591	Metabolism;Metabolism	Global and overview maps;Lipid metabolism	Lipids and lipid-like molecules	Fatty Acyls	Lineolic acids and derivatives	1.4412	1.441	1.3624	2.605e-06	3.688e-05	5.6235	5.0381	5.4638	5.359	5.5043	5.5334	5.113	5.2151	6.0483	5.7639	5.02	2.6665	4.1622	3.6616	2.3398	3.7442	4.384	4.7352	4.213	4.2901	4.0242	4.5166	4.325	4.0909
pos_785	Allysine	metab_46	C04076;C01475	HMDB0059595;HMDB0001263	332.192	pos	M+H-H2O, 2M+ACN+H	C6H11NO3	0.589933	1962-83-0	-	-	map01100;map00310;map01110;map00300;map00960;map01230;map01130;map01064;map01060	Metabolism;Metabolism;Metabolism;Metabolism;Metabolism;Metabolism;Metabolism;Metabolism;Metabolism	Global and overview maps;Amino acid metabolism;Global and overview maps;Amino acid metabolism;Biosynthesis of other secondary metabolites;Global and overview maps;Global and overview maps;Chemical structure transformation maps;Chemical structure transformation maps	Organic acids and derivatives	Carboxylic acids and derivatives	Amino acids, peptides, and analogues	1.4319	1.4389	1.4804	4.373e-07	9.107e-06	4.689	4.1315	4.1641	4.261	4.2994	4.1191	4.6802	4.1415	3.8701	4.3816	3.0892	2.7344	2.464	2.2286	1.6513	3.238	3.5513	3.0367	3.6646	3.8991	3.1383	2.3129	2.5985	2.8059
neg_3148	3-Isopropylmalate	metab_241	C04411	HMDB0012156	157.051	neg	M-H2O-H	C7H12O5	1.03442	921-28-8	-	-	map01100;map01210;map01110;map01230;map00290	Metabolism;Metabolism;Metabolism;Metabolism;Metabolism	Global and overview maps;Global and overview maps;Global and overview maps;Global and overview maps;Amino acid metabolism	Lipids and lipid-like molecules	Fatty Acyls	Fatty acids and conjugates	1.4285	1.4364	1.6474	0.0008833	0.003813	5.6248	3.7012	4.2879	4.9735	5.0537	4.9961	4.5724	4.2408	5.4677	5.0765	0.6173	3.8358	2.7085	4.1138	3.5319	2.5716	0.3272	3.3877	5.7158	1.7016	0.4255	4.1675	3.4871	4.1888
neg_9530	3beta-3-Hydroxy-11-oxolanosta-8,24-dien-26-al	metab_237	-	HMDB0035406	499.34	neg	M+FA-H	C30H46O3	8.64862	126313-85-7	-	-	-	-	-	Lipids and lipid-like molecules	Prenol lipids	Triterpenoids	1.3933	1.3883	0.6227	0.0147	0.03743	5.3877	6.0404	4.9723	1.1895	1.5224	1.3604	3.4817	3.9336	1.4029	1.3574	5.3871	5.6351	4.4015	3.9497	3.9259	5.4065	4.1882	5.5365	4.8488	4.1979	5.207	6.5494	4.0453	5.6336
pos_4859	Berberine	metab_58	C00757	HMDB0003409	336.124	pos	M+H	C20H17NO4	3.01272	2086-83-1	-	-	map00950;map01110;map01063;map04152	Metabolism;Metabolism;Metabolism;Environmental Information Processing	Biosynthesis of other secondary metabolites;Global and overview maps;Chemical structure transformation maps;Signal transduction	Alkaloids and derivatives	Protoberberine alkaloids and derivatives	-	1.3899	1.3775	0.5509	0.02566	0.05976	0.1135	0.0574	3.5448	0.0859	0.0739	4.0004	3.9549	5.2461	5.0767	4.8363	4.1289	7.0645	6.8794	2.8588	4.8272	6.78	6.3198	2.0224	3.0105	4.7338	6.8815	7.5573	2.4846	3.0422
pos_754	L-Glutamate	metab_120	C00025;C00217;C00302	HMDB0060475;HMDB0003339;HMDB0000148	148.061	pos	M+H, 2M+H, M+H-H2O	C5H9NO4	0.844867	-	Peptides;Hormones and transmitters;Peptides;-	Amino acids;Neurotransmitters;Amino acids;-	map01110;map01200;map00330;map00480;map00332;map04742;map00250;map05033;map04974;map04072;map04216;map00630;map00430;map04964;map00471;map02010;map00860;map04080;map05016;map05014;map04727;map01064;map04723;map05031;map04721;map01060;map01100;map00220;map04540;map01120;map01210;map00340;map00524;map01230;map04068;map05034;map00660;map04724;map00460;map05030;map00650;map00910;map02020;map04713;map…	Metabolism;Metabolism;Metabolism;Metabolism;Metabolism;Organismal Systems;Metabolism;Human Diseases;Organismal Systems;Environmental Information Processing;Cellular Processes;Metabolism;Metabolism;Organismal Systems;Metabolism;Environmental Information Processing;Metabolism;Environmental Information Processing;Human Diseases;Human Diseases;Organismal Systems;Metabolism;Organismal Systems;Human Di…	Global and overview maps;Global and overview maps;Amino acid metabolism;Metabolism of other amino acids;Biosynthesis of other secondary metabolites;Sensory system;Amino acid metabolism;Substance dependence;Digestive system;Signal transduction;Cell growth and death;Carbohydrate metabolism;Metabolism of other amino acids;Excretory system;Metabolism of other amino acids;Membrane transport;Metabolism…	Organic acids and derivatives	Carboxylic acids and derivatives	Amino acids, peptides, and analogues	1.3823	1.3801	1.2583	5.465e-10	2.418e-08	5.7199	5.692	5.1747	5.2643	5.3637	5.6329	5.8382	5.3006	5.2105	5.4521	4.1432	4.5299	4.6281	4.5213	4.1822	4.2342	4.4629	4.0241	4.2265	4.0879	4.7461	4.2957	4.4074	4.3159
pos_17164	4-Hydroxynornantenine	metab_28	-	HMDB0033366	324.124	pos	M+H-H2O	C19H19NO5	2.57823	69128-21-8	-	-	-	-	-	Alkaloids and derivatives	Aporphines	-	1.3798	1.3724	0.677	0.001568	0.005843	2.6584	3.3424	2.3202	2.7512	3.8224	2.2933	3.1805	5.1917	5.4208	2.7883	3.4806	6.1494	4.9863	4.6462	4.9389	6.0261	4.7628	4.957	4.9381	4.6671	5.2019	6.8842	3.6892	4.507
neg_1988	N-Palmitoylsphingosine	metab_352	C00195	HMDB0000790;HMDB0004949	582.506	neg	M+Cl, M+FA-H	C34H67NO3	11.5136	24696-26-2	-	-	map01100;map05140;map00600;map04933;map04920;map04071;map04722;map04931	Metabolism;Human Diseases;Metabolism;Human Diseases;Organismal Systems;Environmental Information Processing;Organismal Systems;Human Diseases	Global and overview maps;Infectious diseases: Parasitic;Lipid metabolism;Endocrine and metabolic diseases;Endocrine system;Signal transduction;Nervous system;Endocrine and metabolic diseases	Lipids and lipid-like molecules	Sphingolipids	Ceramides	1.3793	1.3736	0.7715	0.0001528	0.0009328	4.2551	4.8372	5.5418	3.7455	3.9003	5.3712	3.7929	5.294	4.9786	3.7549	6.0348	6.003	5.7379	5.1475	5.6652	5.8524	5.2189	5.9649	6.5104	6.0442	5.3997	6.4632	5.9697	6.5099
pos_13840	Bilirubin glucuronide	metab_62	C03374;C03033	HMDB0060169;HMDB0010332	761.297	pos	M+H	C39H44N4O12	4.87708	-	-	-	map01100;map00040;map04976	Metabolism;Metabolism;Organismal Systems	Global and overview maps;Carbohydrate metabolism;Digestive system	Organoheterocyclic compounds	Tetrapyrroles and derivatives	Bilirubins	1.367	1.3414	1.5749	0.004548	0.01412	4.1317	6.6426	6.5953	3.1531	3.5273	5.3421	4.2135	5.9292	4.9897	5.5229	4.1023	2.1974	3.5057	4.288	3.0709	3.0388	5.8418	3.8709	3.954	0.4594	5.457	2.3859	0.5134	1.8121
pos_17952	Porphobilinogen	metab_183	C00931	HMDB0000245	227.104	pos	M+H	C10H14N2O4	0.98285	487-90-1	-	-	map01100;map01110;map00860;map01120	Metabolism;Metabolism;Metabolism;Metabolism	Global and overview maps;Global and overview maps;Metabolism of cofactors and vitamins;Global and overview maps	Organic nitrogen compounds	Organonitrogen compounds	Amines	1.3517	1.3304	0.5833	0.005907	0.01757	2.6972	0.8247	3.4953	3.58	0.9271	0.9866	4.1286	2.6439	0.872	0.9582	4.0952	4.0956	3.3405	3.4165	2.3725	3.7381	4.0889	3.7917	3.893	3.5876	3.0805	3.6707	3.5764	3.9147
neg_4677	Validamycin A	metab_391	C12112	HMDB0036592	496.208	neg	M-H	C20H35NO13	4.56487	37248-47-8	-	-	map01130;map00525	Metabolism;Metabolism	Global and overview maps;Biosynthesis of other secondary metabolites	Organic oxygen compounds	Organooxygen compounds	Carbohydrates and carbohydrate conjugates	1.3513	1.3389	1.7533	0.005057	0.0153	4.3727	4.1208	3.3867	3.3964	4.9284	6.6129	4.352	3.6338	4.0136	4.8945	4.4059	4.2881	3.6454	2.6098	0.0496	3.2979	0.0377	4.1675	0.092	3.8645	4.1173	4.1324	0.056	0.1403
neg_15434	L-Histidine	metab_308	C00135	HMDB0000177	154.063	neg	M-H	C6H9N3O2	0.60065	71-00-1	Peptides	Amino acids	map01100;map01110;map05230;map00340;map02010;map01230;map04974;map00970;map01065;map00410;map01060	Metabolism;Metabolism;Human Diseases;Metabolism;Environmental Information Processing;Metabolism;Organismal Systems;Genetic Information Processing;Metabolism;Metabolism;Metabolism	Global and overview maps;Global and overview maps;Cancers: Overview;Amino acid metabolism;Membrane transport;Global and overview maps;Digestive system;Translation;Chemical structure transformation maps;Metabolism of other amino acids;Chemical structure transformation maps	Organic acids and derivatives	Carboxylic acids and derivatives	Amino acids, peptides, and analogues	1.3496	1.3435	1.3508	1.241e-05	0.0001187	4.8524	6.0858	5.2289	5.2673	4.9953	4.6686	4.6994	5.2979	5.3025	4.768	5.1367	4.1753	3.1632	3.2925	2.3819	3.9844	4.4557	3.5569	4.3285	4.2856	3.3601	3.0118	4.3358	3.563
pos_18022	1-ACETYLPIPERIDINE	metab_11	-	-	128.107	pos	M+H	C7H13NO	0.844867	-	-	-	-	-	-	-	-	-	1.3367	1.3615	1.3992	0.0002081	0.001185	6.4329	4.7529	5.0879	5.781	5.8024	5.6416	5.6848	4.4776	5.6556	5.0104	5.5768	4.4113	4.1766	2.8047	2.3771	4.5349	3.395	2.7492	2.8241	4.5303	2.4035	4.5805	4.7299	5.267
neg_9205	Cis-5-Tetradecenoylcarnitine	metab_270	-	LMFA07070057;HMDB0002014	390.263	neg	M+Na-2H	C21H39NO4	9.04028	835598-21-5	-	-	-	-	-	Lipids and lipid-like molecules	Fatty Acyls	Fatty acid esters	1.3246	1.3237	0.8078	0.0009329	0.003976	5.8812	4.9411	4.6166	5.1254	6.2733	5.9596	3.8691	5.3402	6.7882	5.0946	7.0283	6.2602	6.2767	6.5667	6.8556	7.1133	6.3387	6.9487	6.7543	6.5251	6.6125	6.8013	6.5455	6.7665
pos_17887	Arginyl-Proline	metab_54	-	HMDB0028717	254.161	pos	M+H-H2O	C11H21N5O3	1.21818	-	-	-	-	-	-	Organic acids and derivatives	Carboxylic acids and derivatives	Amino acids, peptides, and analogues	1.3242	1.3353	1.5104	0.001249	0.004913	6.0763	4.583	4.2307	5.5514	4.4099	5.4216	3.7469	5.2839	4.7499	5.1567	1.4459	3.5039	4.4933	4.2208	5.3634	1.4323	1.3607	4.6525	2.5099	1.8007	2.4149	5.0197	3.1053	4.295
neg_15041	Ophthalmic acid	metab_355	-	HMDB0005765	288.119	neg	M-H	C11H19N3O6	1.3099	495-27-2	-	-	-	-	-	Organic acids and derivatives	Carboxylic acids and derivatives	Amino acids, peptides, and analogues	1.323	1.2951	1.7039	0.002555	0.008867	4.0934	4.7115	4.4549	2.9547	4.8108	3.4917	4.1368	4.1559	3.9547	3.8011	0.0095	2.9344	1.7748	3.5962	4.4407	0.0083	3.1035	4.5758	1.8438	0.9367	4.9084	1.4816	2.8852	0.8381
neg_3236	3-(3,4-Dihydroxyphenyl)lactic acid	metab_234	C01207	HMDB0003503	197.046	neg	M-H	C9H10O5	1.79185	23028-17-3	-	-	map00350	Metabolism	Amino acid metabolism	Phenylpropanoids and polyketides	Phenylpropanoic acids	-	1.3101	1.3291	1.6032	0.002021	0.007156	4.9803	3.7941	3.9199	4.3449	5.3229	5.01	4.3797	4.3754	5.2325	4.4127	0.917	3.6883	0.5132	2.9839	3.328	0.8686	0.5559	2.69	4.8884	3.4113	4.8505	4.7871	1.9522	4.532
pos_13264	3-keto Fusidic acid	metab_25	-	HMDB0060745	572.359	pos	M+ACN+H	C31H46O7	5.60025	-	-	-	-	-	-	Lipids and lipid-like molecules	Steroids and steroid derivatives	Oxosteroids	1.3096	1.2964	0.7446	0.002184	0.007656	3.8725	2.5261	2.5355	3.8831	5.2616	4.9194	3.8071	4.3476	5.1867	2.9801	5.121	4.1969	6.1444	5.4929	4.7236	5.2626	5.5566	5.3673	4.9917	5.2902	5.179	5.3999	5.5246	5.6835
pos_17956	Chondroitin D-glucuronate	metab_76	-	HMDB0060454	473.177	pos	M+ACN+Na	C16H27NO11	0.98285	-	-	-	-	-	-	Organic oxygen compounds	Organooxygen compounds	Carbohydrates and carbohydrate conjugates	1.3064	1.2817	0.6713	0.006966	0.01989	2.7358	1.5468	3.9544	4.2536	1.662	3.3829	5.0841	1.544	1.6005	3.4127	3.3862	4.5179	4.1759	3.2261	4.761	4.8397	4.6991	4.678	4.6159	4.2151	3.9624	4.6222	4.6754	4.4796
pos_8046	N-Oleoylethanolamine	metab_155	-	HMDB0002088	651.603	pos	2M+H	C20H39NO2	8.75568	111-58-0	-	-	-	-	-	Organic nitrogen compounds	Organonitrogen compounds	Amines	1.3052	1.2911	1.6573	0.00643	0.01881	4.8235	4.6287	5.1669	4.6651	4.3811	4.1838	4.3279	5.0228	4.2702	4.573	0.6551	0.6204	6.3474	0.6353	4.5656	0.6441	4.1018	2.8461	3.4209	5.4293	3.996	0.5652	4.4354	0.6301
pos_11038	Dihydroceramide C2	metab_89	-	-	344.316	pos	M+H	C20H41NO3	8.6558	-	-	-	-	-	-	-	-	-	1.3013	1.2687	0.6386	0.01765	0.04371	4.4162	1.0031	1.0116	5.5001	3.0769	4.0807	4.3019	1.0005	1.0531	3.1247	4.5026	5.4401	3.4919	4.2757	4.815	4.4209	2.5873	4.4999	3.9812	4.0736	4.0981	5.6021	5.3476	5.4983
pos_869	2-Hydroxycinnamic acid	metab_17	C01772	HMDB0134028;HMDB0062655;HMDB0002641	165.055	pos	M+H-H2O, M+H	C9H8O3	0.992867	583-17-5	-	-	map01110;map00940;map00360;map01120	Metabolism;Metabolism;Metabolism;Metabolism	Global and overview maps;Biosynthesis of other secondary metabolites;Amino acid metabolism;Global and overview maps	Phenylpropanoids and polyketides	Cinnamic acids and derivatives	Hydroxycinnamic acids and derivatives	1.29	1.2758	1.2135	2.803e-07	6.453e-06	5.9095	6.5259	5.8233	6.0352	5.5518	5.7027	5.4979	5.5174	5.9258	5.4908	4.7686	4.8097	5.139	4.7821	4.2718	4.7846	4.5672	4.6644	4.9213	4.3944	5.1155	4.7759	5.1741	4.725
neg_14794	Acetyl-DL-Valine	metab_255	-	-	158.083	neg	M-H	C7H13NO3	2.27993	-	-	-	-	-	-	-	-	-	1.2847	1.2815	1.3463	1.801e-05	0.0001487	5.0233	4.4066	4.6461	4.5557	5.4985	4.5574	4.8426	4.4741	5.2507	4.4899	4.578	4.5052	2.4046	4.0242	2.5892	2.8548	3.2821	3.2134	3.445	4.0497	4.286	2.9994	3.3995	4.0101
neg_9501	Ascorbyl stearate	metab_261	-	LMFA07010789;HMDB0038242	477.258	neg	M+Cl	C24H42O7	8.68797	10605-09-1	-	-	-	-	-	Lipids and lipid-like molecules	Fatty Acyls	Fatty acid esters	1.2708	1.2468	1.4367	0.003905	0.01234	6.4291	4.8977	5.1911	5.1202	5.35	5.889	5.0798	4.5569	5.7166	5.066	5.217	1.1214	4.7602	4.5384	5.5347	5.7095	2.7524	2.1036	1.0865	3.4647	5.0511	1.7172	5.3836	3.4979
pos_18106	1,4-Methylimidazoleacetic acid	metab_6	-	-	141.066	pos	M+H	C6H8N2O2	0.6817	-	-	-	-	-	-	-	-	-	1.2645	1.2625	1.3403	0.0005466	0.002655	5.4939	5.2208	5.6529	6.3979	5.7931	5.8069	6.1351	4.3966	5.3416	5.4864	5.128	4.9677	5.2831	1.9866	4.5405	2.9961	4.0849	3.9885	4.0511	5.0889	4.6153	4.3507	5.1794	1.9543
pos_16303	(-)-trans-Carveol glucoside	metab_0	-	HMDB0029848	359.141	pos	M+2Na-H	C16H26O6	3.39457	113349-30-7	-	-	-	-	-	Lipids and lipid-like molecules	Prenol lipids	Terpene glycosides	1.2523	1.2553	1.381	3.582e-05	0.0002682	5.1951	4.0896	4.3414	4.694	3.935	4.1688	4.0627	4.582	4.3338	4.6399	3.9614	3.1594	2.2003	2.206	4.0235	3.4397	1.9939	3.3822	3.61	3.1598	2.6241	3.8182	4.3071	2.7624
pos_4864	Minocycline	metab_141	C07225	LMPK07000002;HMDB0015152	440.186	pos	M+H-H2O	C23H27N3O7	3.02248	10118-90-8	-	-	-	-	-	Phenylpropanoids and polyketides	Tetracyclines	-	1.2507	1.2491	0.6853	0.001813	0.006485	3.85	4.7235	2.0952	3.11	2.972	1.4446	3.0018	2.7345	2.7232	1.8975	4.0634	4.0415	3.0844	4.1102	5.7881	4.4904	3.8437	3.6634	3.9005	3.8356	4.7882	3.6921	4.4282	4.5905
neg_15000	Methyl 7-epi-12-hydroxyjasmonate glucoside	metab_332	-	HMDB0031763	437.162	neg	M+Cl	C19H30O9	1.61055	142465-56-3	-	-	-	-	-	Lipids and lipid-like molecules	Fatty Acyls	Fatty acyl glycosides	1.2483	1.2245	0.5497	0.04829	0.09938	0.6065	0.3	0.3228	4.8101	0.6366	0.5135	4.6327	0.3128	2.8027	6.4858	5.1254	4.3797	2.0834	3.6401	2.2674	3.9122	4.8847	4.2638	3.9143	4.324	2.3125	4.9433	3.5843	4.9273
neg_2775	Hydroxyprolyl-Isoleucine	metab_304	-	HMDB0028866	265.119	neg	M+Na-2H, M+K-2H	C11H20N2O4	2.52997	-	-	-	-	-	-	Organic acids and derivatives	Carboxylic acids and derivatives	Amino acids, peptides, and analogues	1.239	1.26	1.3945	0.001492	0.005693	5.8149	5.712	6.2091	4.3283	3.4133	5.4264	5.3791	5.2179	5.7063	5.0724	4.0957	5.1502	3.3006	2.9169	3.9515	3.6322	4.2749	0.3119	4.3191	3.4842	4.8558	3.9316	3.3767	4.8857
neg_2010	Cerebroside B	metab_268	-	HMDB0035990	772.553	neg	M+Cl, M+FA-H	C41H77NO9	10.894	88642-46-0	-	-	-	-	-	Lipids and lipid-like molecules	Sphingolipids	Glycosphingolipids	1.2259	1.2403	0.7758	0.0006735	0.003096	2.9608	3.8193	4.2236	3.8294	4.8341	5.2029	4.2929	4.0186	3.8799	5.6716	6.0487	5.7416	5.4817	5.3813	4.6861	5.1187	4.7965	5.2802	5.808	4.4423	6.4337	5.9498	5.6053	6.3319
pos_423	Bassic acid	metab_56	-	HMDB0034526;LMPR0106150025	487.341	pos	M+H, M+CH3OH+H, 2M+H	C30H46O5	6.49373	465-01-0	-	-	-	-	-	Lipids and lipid-like molecules	Steroids and steroid derivatives	Hydroxysteroids	1.2238	1.205	0.8235	8.026e-05	0.0005571	4.7364	4.1745	5.3977	5.7933	5.5477	5.2092	4.7125	4.2531	5.1189	4.7434	5.9683	6.5195	5.6705	5.6168	6.311	5.944	5.5869	5.6982	6.9132	6.3921	5.3686	6.3492	5.7504	6.3813
pos_501	1-Monopalmitin	metab_12	-	HMDB0011564	353.267	pos	M+Na, M+K, M+H	C19H38O4	8.95743	-	-	-	-	-	-	Lipids and lipid-like molecules	Glycerolipids	Monoradylglycerols	1.2211	1.2219	1.2388	1.753e-05	0.0001487	5.7702	5.6944	5.7773	5.6683	5.7693	5.9261	5.5953	5.9135	5.2896	5.6523	4.3082	3.4934	4.9258	5.0919	4.9086	4.7873	6.1088	4.7466	4.0059	4.5729	5.0451	4.1685	4.4618	3.863
pos_2910	Alpha-Hederin	metab_47	C08954	-	751.461	pos	M+H, M+Na	C41H66O12	6.58537	-	-	-	-	-	-	-	-	-	1.2202	1.1913	0.488	0.04622	0.09681	0.7744	0.5238	0.5304	0.6648	0.6098	0.6612	4.2045	0.5218	7.0072	0.6366	3.7771	3.6055	3.8533	2.0646	2.8432	2.9915	3.2613	4.6034	2.0231	1.9845	2.7045	5.9985	2.064	4.4988
pos_7957	PS(18:1(9Z)/0:0)	metab_185	-	LMGP03050001	524.298	pos	M+H	C24H46NO9P	8.64635	-	-	-	-	-	-	-	-	-	1.2166	1.2041	1.384	0.003737	0.01211	5.3979	5.9305	5.6479	5.5665	5.897	4.9359	5.2591	4.4562	5.6374	5.4777	4.2919	0.4534	3.0322	4.5946	4.3658	5.2123	5.2217	4.9075	3.9864	4.5847	4.3911	5.0704	4.2704	0.4616
pos_18084	N1,N12-Diacetylspermine	metab_145	C03413	HMDB0002172	287.245	pos	M+H	C14H30N4O2	0.72465	61345-83-3	-	-	-	-	-	Organic acids and derivatives	Carboximidic acids and derivatives	Carboximidic acids	1.2086	1.2232	1.3509	0.001484	0.005693	6.3272	5.9772	5.2195	5.7427	5.1561	4.8889	5.5446	4.0597	5.8485	5.5984	5.2722	1.995	4.5438	2.0142	1.9398	3.9468	5.1103	4.2079	5.2255	4.7237	3.8891	3.5404	4.8728	5.0549
pos_543	22,23-Dihydroergosterol	metab_13	-	HMDB0030139	399.362	pos	M+H, 2M+H, M+ACN+Na	C28H46O	10.6753	516-79-0	-	-	-	-	-	Lipids and lipid-like molecules	Steroids and steroid derivatives	Cholestane steroids	1.2039	1.1797	0.8137	1.51e-05	0.0001336	4.7417	3.872	4.5817	4.2867	3.9421	4.5241	4.255	4.9217	4.1562	3.5712	5.0107	5.3555	5.0058	4.6125	5.2304	5.3414	5.3898	5.1214	5.9491	4.8757	4.7959	5.9921	5.4674	5.5763
neg_2796	Quinoline-4,8-diol	metab_370	C05637	HMDB0060289	206.046	neg	M-H, M+FA-H	C9H7NO2	2.37495	-	-	-	map00380	Metabolism	Amino acid metabolism	Organoheterocyclic compounds	Quinolines and derivatives	Quinolones and derivatives	1.1998	1.202	1.5267	0.007261	0.02056	4.613	3.9319	4.598	4.7709	4.985	4.7337	5.4244	3.6285	4.9441	5.0069	1.5759	4.9349	1.0939	5.0922	1.2668	1.9706	1.1496	6.1906	5.0391	3.8237	1.3098	3.431	1.3201	4.5757
pos_16799	N-Methyl-14-O-demethylepiporphyroxine	metab_153	-	HMDB0030171	410.098	pos	M+K	C20H21NO6	2.95458	18361-67-6	-	-	-	-	-	Alkaloids and derivatives	Rhoeadine alkaloids	-	1.1997	1.161	1.4933	0.03193	0.072	3.929	3.2646	5.1406	4.9672	3.2583	3.6314	5.779	7.7206	7.2464	6.2565	1.343	1.3002	4.1666	5.341	6.1236	5.9466	1.2588	4.2179	3.5316	1.2621	5.0218	1.23	5.5101	1.7336
neg_3467	2-Isopropylmalic acid	metab_233	C02504	HMDB0000402	175.062	neg	M-H	C7H12O5	2.41418	3237-44-3	-	-	map01100;map01110;map00290;map01210;map01230;map00620	Metabolism;Metabolism;Metabolism;Metabolism;Metabolism;Metabolism	Global and overview maps;Global and overview maps;Amino acid metabolism;Global and overview maps;Global and overview maps;Carbohydrate metabolism	Lipids and lipid-like molecules	Fatty Acyls	Fatty acids and conjugates	1.1993	1.1713	1.276	0.0002108	0.001185	5.3572	5.1477	5.3049	4.9494	5.7256	5.4255	5.4974	4.6311	5.2914	5.8274	3.0949	3.4775	4.7443	4.2718	5.1519	4.8579	2.6491	5.6197	4.3844	3.6089	4.8169	3.8159	4.3059	3.5233
neg_3115	3-Hydroxypicolinic acid	metab_239	C18620	HMDB0013188	138.021	neg	M-H	C6H5NO3	0.9739	874-24-8	-	-	-	-	-	Organoheterocyclic compounds	Pyridines and derivatives	Pyridinecarboxylic acids and derivatives	1.1969	1.1946	1.2874	2.44e-05	0.0001877	4.7043	4.6958	5.0511	4.7985	4.9597	4.8075	4.7928	4.5476	4.5096	5.2857	3.6335	3.8433	3.1908	3.2189	4.0517	3.9692	2.0398	4.0969	4.284	3.4074	3.6159	4.6978	4.0271	4.2878
neg_9256	LysoPC(20:1(11Z))	metab_321	C04230	HMDB0010391	594.374	neg	M+FA-H	C28H56NO7P	8.96318	-	Lipids	Phospholipids	map00564;map05231	Metabolism;Human Diseases	Lipid metabolism;Cancers: Overview	Lipids and lipid-like molecules	Glycerophospholipids	Glycerophosphocholines	1.1878	1.16	1.3107	0.00111	0.004414	5.6663	6.1338	5.4633	4.3544	5.3655	5.5946	4.8622	4.8784	5.0777	5.0873	4.9484	3.9759	4.5422	4.7311	4.7958	3.7437	4.6692	4.826	2.0259	4.4645	4.6163	2.1458	4.3431	2.2329
pos_12923	Cholestane-3,7,12,25-tetrol-3-glucuronide	metab_74	C03033	HMDB0010355;LMST05010042;LMST05010063	613.395	pos	M+H	C33H56O10	5.99643	77172-80-6	-	-	map01100;map00040;map04976	Metabolism;Metabolism;Organismal Systems	Global and overview maps;Carbohydrate metabolism;Digestive system	Lipids and lipid-like molecules	Steroids and steroid derivatives	Steroidal glycosides	1.1865	1.1906	1.3373	0.004405	0.0138	4.5805	6.3568	6.7453	4.284	3.8799	5.5599	3.7798	6.2595	5.0884	5.2035	3.4817	4.0041	4.0703	3.1917	2.8422	4.5665	4.9481	4.0297	2.5275	3.6653	2.9758	4.5243	4.3173	5.0209
neg_8189	SM(d18:0/16:1(9Z))	metab_375	C00550	HMDB0013464	747.564	neg	M+FA-H	C39H79N2O6P	11.0879	-	Lipids	Phospholipids	map00600;map01100;map04071	Metabolism;Metabolism;Environmental Information Processing	Lipid metabolism;Global and overview maps;Signal transduction	Lipids and lipid-like molecules	Sphingolipids	Phosphosphingolipids	1.1616	1.1711	0.7906	0.007733	0.02155	5.1319	5.6283	4.9172	1.8507	4.595	4.5478	4.2014	5.443	4.6431	3.5579	6.5669	5.6975	5.2779	5.3889	5.4784	5.3254	5.9951	5.7044	5.5742	5.7533	5.5171	5.5477	5.4804	5.521
pos_2499	PG(18:1(9Z)/0:0)	metab_176	-	LMGP04050006	511.303	pos	M+H-H2O, M+H	C24H47O9P	9.04498	-	-	-	-	-	-	-	-	-	1.1597	1.1313	1.2293	0.0002168	0.001199	5.8833	5.6262	5.9778	6.3261	6.0479	5.8909	5.5087	4.7668	5.3357	5.9536	4.83	4.8912	4.6278	5.2589	4.3462	5.0068	4.0007	5.285	5.4336	3.9024	5.274	4.906	4.827	2.691
neg_37	Cholic acid	metab_269	C00695	LMST04010001;HMDB0000619	815.565	neg	M+Cl, 2M-H, M+FA-H, M-H	C24H40O5	6.03452	81-25-4	Steroids	24-Carbon atoms	map01100;map04976;map00121;map00120	Metabolism;Organismal Systems;Metabolism;Metabolism	Global and overview maps;Digestive system;Lipid metabolism;Lipid metabolism	Lipids and lipid-like molecules	Steroids and steroid derivatives	Bile acids, alcohols and derivatives	1.1487	1.148	0.8187	0.0141	0.03643	7.4712	4.3819	4.3403	5.8184	7.0285	7.4318	4.4441	4.4257	6.1774	6.4157	6.2195	6.819	7.5894	7.6675	7.5317	6.4289	7.6599	6.7145	7.8224	7.6144	7.1415	6.0503	7.6526	6.1609
neg_133	Uridine	metab_390	C00299	HMDB0000296	243.062	neg	M-H, M+FA-H, M+Cl	C9H12N2O6	0.96255	58-96-8	Nucleic acids	Nucleosides	map00240;map01100	Metabolism;Metabolism	Nucleotide metabolism;Global and overview maps	Nucleosides, nucleotides, and analogues	Pyrimidine nucleosides	-	1.1478	1.148	1.2213	2.235e-06	3.439e-05	4.7109	5.1326	5.3748	4.9666	5.1106	4.9295	4.8957	4.8947	5.0718	5.7356	4.3553	4.6444	3.6704	3.8627	4.4209	4.1788	3.4293	3.7852	4.6195	4.3263	3.6064	4.7517	4.1875	4.4181
neg_9425	PG(16:0/0:0)[U]	metab_361	-	-	483.27	neg	M-H	C22H45O9P	8.76713	-	-	-	-	-	-	-	-	-	1.1362	1.133	0.876	6.993e-06	7.281e-05	5.9767	6.2112	6.0098	5.969	5.9066	6.3659	5.3363	5.4129	5.5958	5.7042	6.7956	6.6254	6.2366	6.6604	6.8062	6.8594	6.874	7.0566	6.5618	6.6244	6.6298	6.7513	6.5147	6.4755
neg_4114	Tyrosyl-Hydroxyproline	metab_388	-	HMDB0029106	275.102	neg	M-H2O-H	C14H18N2O5	3.65032	-	-	-	-	-	-	Organic acids and derivatives	Carboxylic acids and derivatives	Amino acids, peptides, and analogues	1.1355	1.0947	1.5892	0.01919	0.04622	4.1741	5.1396	4.3585	3.6942	4.702	3.8894	3.7966	3.4363	3.9489	3.9433	4.0111	4.1064	0.1532	0.2211	4.4864	4.7828	0.172	3.8245	4.1735	0.2052	4.5908	0.4263	4.5507	0.4832
neg_15002	2-(1-Ethoxyethoxy)propanoic acid	metab_227	-	HMDB0059918	161.082	neg	M-H	C7H14O4	1.58942	-	-	-	-	-	-	Organic acids and derivatives	Carboxylic acids and derivatives	Carboxylic acids	1.1326	1.1323	1.3149	0.0006405	0.003023	4.4146	4.2559	4.3124	4.7965	5.7463	5.0351	5.2047	4.0512	5.1953	4.5462	3.0154	4.0327	3.4515	3.8433	3.4396	4.501	1.834	4.4366	4.6792	3.4927	2.0022	4.4093	3.6825	3.8117
neg_2597	(-)-Stercobilin	metab_212	-	HMDB0240259	593.331	neg	M-H, M+Cl	C33H46N4O6	3.74378	-	-	-	-	-	-	Organoheterocyclic compounds	Tetrapyrroles and derivatives	Bilirubins	1.1308	1.1075	0.7285	0.02871	0.06562	4.3481	3.8834	2.5973	6.1799	0.7214	3.8577	3.5725	2.7109	3.8518	5.8822	6.7157	7.0507	3.7466	4.8068	5.7323	5.729	4.3297	4.5543	4.3812	4.4784	4.2216	5.3527	4.244	6.9397
neg_5959	Deoxycholic acid	metab_279	C04483	HMDB0000626;LMST04010040	391.283	neg	M-H	C24H40O4	7.0235	83-44-3	Steroids	24-Carbon atoms	map04976;map00121	Organismal Systems;Metabolism	Digestive system;Lipid metabolism	Lipids and lipid-like molecules	Steroids and steroid derivatives	Bile acids, alcohols and derivatives	1.1219	1.1079	0.8209	0.01745	0.0435	5.6662	2.9788	4.7054	5.2308	6.5529	6.0611	5.0267	4.2014	6.8192	7.1078	6.9619	7.2361	6.0358	6.3538	6.6937	6.8362	6.2728	7.0025	6.6589	6.1064	6.332	7.1095	5.9315	7.1595
pos_17316	Miraxanthin-V	metab_142	C08557	-	347.125	pos	M+H	C17H18N2O6	2.40727	-	-	-	map01110;map00965	Metabolism;Metabolism	Global and overview maps;Biosynthesis of other secondary metabolites	-	-	-	1.1172	1.1354	1.2097	2.903e-06	3.806e-05	5.7259	5.2413	4.8898	5.2515	4.9703	5.523	5.2205	4.7361	5.0218	5.3997	3.3616	4.459	3.7279	3.8612	4.5808	4.5357	4.3607	4.8727	4.5089	4.4806	4.1414	4.6916	4.2792	4.2959
neg_3125	N-Acetyl-L-glutamic acid	metab_343	C00624	HMDB0001138	188.057	neg	M-H	C7H11NO5	0.9839	-	-	-	map01100;map00220;map01110;map01210;map01230;map01130	Metabolism;Metabolism;Metabolism;Metabolism;Metabolism;Metabolism	Global and overview maps;Amino acid metabolism;Global and overview maps;Global and overview maps;Global and overview maps;Global and overview maps	Organic acids and derivatives	Carboxylic acids and derivatives	Amino acids, peptides, and analogues	1.1158	1.1243	1.2031	2.267e-05	0.0001783	5.6858	5.4686	5.548	5.635	5.8708	5.2469	5.9952	5.5276	5.5031	5.5457	4.2329	5.4856	4.7565	4.8528	5.089	4.8257	4.1816	4.5488	5.0057	3.3979	3.8386	5.1362	4.7325	5.1136
pos_810	Glutamylisoleucine	metab_105	-	HMDB0028822	243.134	pos	M+H-H2O, M+H	C11H20N2O5	0.660133	5879-22-1	-	-	-	-	-	Organic acids and derivatives	Carboxylic acids and derivatives	Amino acids, peptides, and analogues	1.1057	1.1133	1.2858	0.0001218	0.0007842	4.4929	5.5169	4.3727	4.2182	4.6325	4.1171	4.1812	3.9008	3.9849	4.3494	3.6468	4.1421	2.7783	3.0073	2.0912	3.1665	3.8369	3.7049	3.091	3.8172	3.1889	3.5263	3.5562	4.0997
pos_17976	Ethyl beta-D-glucopyranoside	metab_98	-	HMDB0029968	250.128	pos	M+ACN+H	C8H16O6	0.971883	3198-49-0	-	-	-	-	-	Organic oxygen compounds	Organooxygen compounds	Carbohydrates and carbohydrate conjugates	1.1043	1.104	1.3744	0.001659	0.006055	4.1053	5.0281	4.2975	3.0287	3.6872	3.1825	4.7024	3.2687	2.8831	3.9984	3.2148	3.5776	2.2674	2.3545	2.2796	2.3659	2.2916	3.8387	2.8906	2.648	2.306	2.8945	2.3538	3.6127
neg_2943	Gallic acid	metab_289	C01424	HMDB0005807	169.015	neg	M-H, 2M-H	C7H6O5	1.17822	149-91-7	-	-	map00627;map01120;map01061	Metabolism;Metabolism;Metabolism	Xenobiotics biodegradation and metabolism;Global and overview maps;Chemical structure transformation maps	Benzenoids	Benzene and substituted derivatives	Benzoic acids and derivatives	1.0977	1.0659	1.2928	0.01603	0.04054	4.7802	4.4772	7.0933	5.9569	4.9573	3.9822	5.2242	6.5492	5.3965	7.5738	4.4231	3.7656	6.9797	4.413	3.9801	3.2749	2.9808	5.0864	3.5461	3.8893	5.7553	5.6345	3.2641	3.646
neg_3942	2,2,6,6-Tetramethyl-4-piperidinone	metab_228	-	HMDB0031179	200.129	neg	M+FA-H	C9H17NO	3.33372	826-36-8	-	-	-	-	-	Organoheterocyclic compounds	Piperidines	Piperidinones	1.0952	1.0913	1.1966	5.833e-07	1.098e-05	4.9522	4.8524	5.0197	4.8959	5.2174	4.4768	4.5973	4.7813	5.0668	5.134	4.4126	4.4557	3.7564	3.5814	4.3233	4.0488	3.928	4.3098	4.5211	3.9012	4.0383	3.5398	3.9663	4.5281
pos_8149	LysoPC(22:2(13Z,16Z))	metab_131	C04230	HMDB0010400	576.401	pos	M+H	C30H58NO7P	9.01587	-	Lipids	Phospholipids	map00564;map05231	Metabolism;Human Diseases	Lipid metabolism;Cancers: Overview	Lipids and lipid-like molecules	Glycerophospholipids	Glycerophosphocholines	1.086	1.0523	1.2897	0.006554	0.01902	4.1119	6.1178	5.881	5.0019	5.1765	5.4126	4.9118	6.6133	4.7734	4.9696	5.125	4.0652	4.5285	5.173	4.0128	4.1748	5.9121	4.2273	4.5301	4.6088	3.8895	1.5705	4.0675	1.6133
pos_2215	Beta-Sitostenone	metab_60	-	LMST01040249;HMDB0033934	413.378	pos	M+H, 2M+H	C29H48O	10.8556	1058-61-3	-	-	-	-	-	Lipids and lipid-like molecules	Steroids and steroid derivatives	Stigmastanes and derivatives	1.0762	1.06	0.8553	0.0001641	0.0009844	5.2683	4.3396	5.3905	5.0798	4.9211	5.2664	4.9258	5.7429	4.6943	4.3093	5.4611	5.8415	5.6765	5.3327	5.7887	6.0617	5.8453	5.9479	6.5215	5.254	5.438	6.3598	6.1586	6.0622
pos_8690	(+)-15,16-Dihydroxyoctadecanoic acid	metab_1	-	HMDB0031008	299.258	pos	M+H-H2O	C18H36O4	9.88765	-	-	-	-	-	-	Lipids and lipid-like molecules	Fatty Acyls	Fatty acids and conjugates	1.0749	1.1132	1.5471	0.01304	0.03445	4.2497	3.2118	4.8159	4.3292	4.984	5.5442	4.1461	2.9126	2.6363	4.3986	4.4341	4.1639	0.4395	0.5073	0.4569	4.2389	2.7939	1.559	3.7106	2.2563	0.4743	3.8588	3.5775	4.8406
neg_127	Malic acid	metab_328	C03668;C00149;C00711	HMDB0000156;HMDB0000744	133.015	neg	M-H, M+Na-2H, M-H2O-H	C4H6O5	0.8672	6915-15-7	-;Organic acids;-	-;Carboxylic acids;-	map01110;map05211;map01200;map00620;map00020;map00630;map04964;map00710;map04922;map01066;map01065;map04742;map01063;map01062;map01061;map01060;map01100;map01120;map05200;map00680;map01064;map00720;map02020;map01130;map05230;map01070	Metabolism;Human Diseases;Metabolism;Metabolism;Metabolism;Metabolism;Organismal Systems;Metabolism;Organismal Systems;Metabolism;Metabolism;Organismal Systems;Metabolism;Metabolism;Metabolism;Metabolism;Metabolism;Metabolism;Human Diseases;Metabolism;Metabolism;Metabolism;Environmental Information Processing;Metabolism;Human Diseases;Metabolism	Global and overview maps;Cancers: Specific types;Global and overview maps;Carbohydrate metabolism;Carbohydrate metabolism;Carbohydrate metabolism;Excretory system;Energy metabolism;Endocrine system;Chemical structure transformation maps;Chemical structure transformation maps;Sensory system;Chemical structure transformation maps;Chemical structure transformation maps;Chemical structure transformat…	Organic acids and derivatives	Hydroxy acids and derivatives	Beta hydroxy acids and derivatives	1.0734	1.081	1.1736	1.303e-05	0.0001214	6.197	6.2559	5.8308	5.9115	5.8327	5.7025	5.9628	5.2801	5.8109	5.8145	5.2181	5.5496	4.231	4.1782	4.6143	5.4496	4.4105	5.522	5.0398	4.9477	5.0164	5.4565	4.8665	5.3975
neg_13	Cis-9,10-Epoxystearic acid	metab_271	C19418	HMDB0061650	297.243	neg	M-H, 2M-H, M+FA-H, M+K-2H, M+Cl	C18H34O3	7.5752	-	-	-	map00073	Metabolism	Lipid metabolism	Lipids and lipid-like molecules	Fatty Acyls	Lineolic acids and derivatives	1.0683	1.0578	0.8592	0.001512	0.005693	6.9053	4.8822	5.7444	6.3518	6.1525	6.1384	5.2454	5.1118	6.4236	5.3981	6.6111	5.9197	7.5679	7.405	7.053	5.8225	6.9701	7.0607	6.3899	7.463	6.5486	6.9895	6.7597	6.5201
pos_16770	Trans-O-Methylgrandmarin	metab_207	-	HMDB0039031	307.118	pos	M+H	C16H18O6	2.98117	-	-	-	-	-	-	Phenylpropanoids and polyketides	Coumarins and derivatives	Pyranocoumarins	1.0641	1.0971	0.3848	0.03268	0.0729	0.0009	0.0004	4.8452	0.0007	1.7375	0.0007	0.752	0.0004	2.008	0.0006	0.4899	1.784	2.6614	3.3026	2.9165	1.6811	0.0178	3.2864	5.4956	0.0171	4.3069	3.0665	2.2131	2.7734
neg_3255	Dopaquinone	metab_284	C00822	HMDB0001229;HMDB0039119	240.051	neg	M+FA-H	C9H9NO4	2.01333	4430-97-1	-	-	map01100;map00965;map00350	Metabolism;Metabolism;Metabolism	Global and overview maps;Biosynthesis of other secondary metabolites;Amino acid metabolism	Organic acids and derivatives	Carboxylic acids and derivatives	Amino acids, peptides, and analogues	1.0578	1.0784	1.2351	0.0002709	0.001453	5.1972	4.8603	4.884	5.7194	5.1948	5.3282	5.1195	4.842	5.0947	4.9297	3.0542	4.786	3.3162	3.9723	4.6981	4.8696	2.7525	4.1631	4.2332	3.6656	4.1389	5.0346	4.2029	5.1096
pos_17785	Alpha-L-Rhamnopyranosyl-(1->3)-alpha-D-galactopyranosyl-(1->3)-L-fucose	metab_48	-	HMDB0039741	536.196	pos	M+ACN+Na	C18H32O14	2.09963	71144-75-7	-	-	-	-	-	Organooxygen compounds	Carbohydrates and carbohydrate conjugates	Glycosyl compounds	1.0494	1.0414	0.7158	0.03636	0.07913	2.1634	1.8416	4.958	5.4367	1.9583	4.7458	2.5372	1.8388	1.896	1.993	3.5526	3.8964	3.7591	5.4994	3.8906	4.4584	3.8305	4.1446	3.8613	3.9779	3.65	4.3337	4.1638	4.4244
pos_11463	PE(17:1(9Z)/0:0)	metab_172	-	LMGP02050008	466.293	pos	M+H	C22H44NO7P	8.05568	-	-	-	-	-	-	-	-	-	1.0331	1.0824	1.582	0.04709	0.09749	5.2237	5.803	3.6336	4.8793	5.9101	4.0458	5.2568	0.6904	5.2236	4.593	2.9972	4.6024	0.0154	0.0194	5.0219	5.4762	5.209	0.0192	2.9978	4.2101	0.0174	5.8047	3.6481	0.0191
pos_6357	3-Carboxy-2,3,4,9-tetrahydro-1H-pyrido[3,4-b]indole-1-propanoic acid	metab_23	-	HMDB0034881	289.119	pos	M+H	C15H16N2O4	4.4692	-	-	-	-	-	-	Alkaloids and derivatives	Harmala alkaloids	-	1.022	0.9821	1.6014	0.04374	0.09271	4.3154	2.5743	2.1063	4.7398	3.9456	3.6645	4.2648	4.1226	3.6097	3.8542	2.185	0	3.6544	4.2448	4.7207	4.6862	0	0.3882	0	2.5007	5.6092	0	4.5345	0
pos_2584	Farnesyl acetone	metab_99	-	-	263.237	pos	M+H-H2O, M+H	C18H30O	8.45798	-	-	-	-	-	-	-	-	-	1.0127	0.9993	1.0992	5.891e-07	1.098e-05	6.7303	6.7917	6.911	6.8753	6.7737	6.2654	6.5476	6.702	6.6752	6.8664	6.1512	6.0173	6.0535	6.2551	6.1214	6.1484	6.0399	6.3039	6.1347	5.9859	6.2102	5.9966	6.1361	5.9608
pos_18058	N-Acetylputrescine	metab_148	C02714	HMDB0002064	131.118	pos	M+H	C6H14N2O	0.7793	18233-70-0	-	-	map01100;map00330	Metabolism;Metabolism	Global and overview maps;Amino acid metabolism	Organic acids and derivatives	Carboximidic acids and derivatives	Carboximidic acids	1.0072	1.0382	1.2309	0.00174	0.006286	6.2834	4.7881	5.2913	5.9249	5.3387	5.6591	5.6415	4.4857	5.5961	4.4497	5.5763	3.278	4.2252	3.5075	3.8249	4.6242	4.3359	3.9084	3.9397	4.8617	3.3554	4.657	5.026	5.6785
neg_14045	N-Acetyl-D-phenylalanine	metab_341	C05620	-	206.082	neg	M-H	C11H13NO3	3.02973	-	-	-	map00360	Metabolism	Amino acid metabolism	-	-	-	1.0063	0.987	1.2017	0.0007812	0.003485	5.2984	4.5794	4.5938	4.8645	5.8917	4.99	5.5063	5.5678	5.2532	4.6883	4.6861	4.5572	4.4848	4.2112	3.1063	3.7791	3.3928	4.782	4.6244	4.4194	4.7225	3.2826	5.2175	4.4166
pos_390	3a,7a,12b-Trihydroxy-5b-cholanoic acid	metab_19	-	HMDB0000312	817.578	pos	M+H-2H2O, 2M+ACN+H, 2M+H	C24H40O5	5.33052	71883-64-2	-	-	-	-	-	Lipids and lipid-like molecules	Steroids and steroid derivatives	Bile acids, alcohols and derivatives	1.0056	1.0197	1.1914	0.02873	0.06562	7.2116	3.6951	5.9277	6.2583	7.7956	7.9759	6.8825	7.7545	7.8292	7.0762	4.8886	5.2346	6.8405	6.4207	6.5149	5.216	5.4398	5.2575	5.9546	5.4909	5.677	5.3959	5.9651	6.099
pos_17900	Deoxyinosine	metab_88	C05512	HMDB0000071	253.094	pos	M+H	C10H12N4O4	1.09263	890-38-0	-	-	map01100;map00230	Metabolism;Metabolism	Global and overview maps;Nucleotide metabolism	Nucleosides, nucleotides, and analogues	Purine nucleosides	Purine 2'-deoxyribonucleosides	1.0018	1.0083	1.3244	0.006851	0.01972	4.4659	4.3934	3.6246	4.5667	5.0048	4.5882	4.9157	4.3702	4.7963	4.3484	4.1254	4.7117	4.1811	2.3816	0.1018	4.4797	3.0513	3.2207	4.0861	4.0813	1.9855	2.969	4.4239	3.8438
